# Supplementary material for: Inducing configurational stability in inherently flexible expanded heterohelicenes and unlocking stimuli-responsive chiroptical switching
Source: Royal Society of Chemistry journal article supplement (doi:10.1039/d6sc02610a), 2026-04-13
Supplement: d6sc02610a6.pdf [file d6sc02610a6.pdf]

## Electronic Supporting Information

### Inducing Configurational Stability in Inherently Flexible Expanded Heterohelicenes and Unlocking Stimuli-Responsive Chiroptical Switching

Manisha Pal,<sup>a#</sup> Pirudhan Karak,<sup>a#</sup> Debranjana Hati,<sup>b</sup> Mrityunjay Giri,<sup>a</sup> Subi J. George,<sup>\*b</sup> and Joyanta Choudhury<sup>\*a</sup>

<sup>a</sup>Organometallics & Smart Materials Laboratory, Department of Chemistry, Indian Institute of Science Education and Research Bhopal, Bhopal 462 066, India

<sup>b</sup>New Chemistry Unit and School of Advanced Materials, Jawaharlal Nehru Centre for Advanced Scientific Research (JNCASR), Bangalore 560064, India

# M.P. and P.K. contributed equally to this work.

## Table of Contents

|            |                                                                            |      |
|------------|----------------------------------------------------------------------------|------|
| <b>S1</b>  | Materials, Methods, and Instrumentation                                    | S3   |
| <b>S2</b>  | Synthesis of Expanded Poly-aza[9]helicenes Precursors                      | S4   |
| <b>S3</b>  | Synthesis of Expanded Poly-aza[9]helicenes <b>HELI-1</b> and <b>HELI-2</b> | S7   |
| <b>S4</b>  | Single Crystal X-Ray Diffraction Analysis                                  | S10  |
| <b>S5</b>  | Enantiomerization Barrier Calculation                                      | S18  |
| <b>S6</b>  | Molecular Spring Constant Calculation                                      | S21  |
| <b>S7</b>  | Resolution of <b>HELI-1</b> and <b>HELI-2</b> by HPLC                      | S23  |
| <b>S8</b>  | Spectroscopic Measurements                                                 | S24  |
| <b>S9</b>  | Variable Temperature CD and CPL Studies                                    | S32  |
| <b>S10</b> | Acid-Base Responsive Reversible CPL Switching in the Solution State        | S47  |
| <b>S11</b> | Monitoring Stepwise Protonation Process by <sup>1</sup> H NMR Spectroscopy | S49  |
| <b>S12</b> | Acid-Base Responsive Reversible Behaviour in the Solid State               | S50  |
| <b>S13</b> | Calculated HOMO-LUMO for <b>HELI-2</b> and Protonated <b>HELI-2</b>        | S51  |
| <b>S14</b> | Computational ECD Spectra                                                  | S59  |
| <b>S15</b> | Cartesian Coordinates of the DFT Computed Molecules                        | S59  |
| <b>S16</b> | <sup>1</sup> H, <sup>13</sup> C{ <sup>1</sup> H} NMR and ESI Mass Spectra  | S96  |
| <b>S17</b> | References                                                                 | S102 |

## S1. Materials, Methods, and Instrumentation

Dry solvents and reagents were purchased from commercial suppliers and used without further purification. Deuterated solvents,  $\text{RhCl}_3 \cdot x\text{H}_2\text{O}$  were purchased from Aldrich.  $[\text{Cp}^*\text{RhCl}_2]_2$  was synthesized according to the reported procedure.<sup>S1</sup>  $^1\text{H}$ ,  $^{13}\text{C}\{^1\text{H}\}$  NMR spectra were recorded on Bruker AVANCE III 400, 500, and 700 MHz NMR spectrometers at room temperature unless mentioned otherwise. Chemical shifts ( $\delta$ ) are expressed in ppm using the residual proton resonance of the solvent as an internal standard ( $\text{CHCl}_3$ :  $\delta = 7.26$  ppm for  $^1\text{H}$  spectra, 77.2 ppm for  $^{13}\text{C}\{^1\text{H}\}$  spectra; DMSO:  $\delta = 2.50$  ppm for  $^1\text{H}$  spectra, 39.5 ppm for  $^{13}\text{C}\{^1\text{H}\}$  spectra). All coupling constants ( $J$ ) are expressed in hertz (Hz) and are only given for  $^1\text{H}$ - $^1\text{H}$  couplings unless mentioned otherwise. The following abbreviations were used to indicate multiplicity: s (singlet), d (doublet), t (triplet), q (quartet), dd (doublet of doublets), dt (doublet of triplets), ddd (doublet of doublets of doublets), and m (multiplet). ESI mass spectrometry was performed on a Bruker microTOF QII spectrometer. Steady-state absorption spectra were recorded on Cary 100 UV-vis spectrophotometer.

Single-crystal X-ray diffraction data were collected at low temperatures using a Bruker D8 QUEST PHOTON 100 diffractometer equipped with graphite-monochromated Mo  $\text{K}\alpha$  radiation ( $\lambda = 0.71073 \text{ \AA}$ ). Data reduction was performed using the Bruker Apex V software suite, and the crystal structures were solved via Intrinsic Phasing using the ShelXT program. Steady-state absorption spectra were recorded on a Cary 100 UV-Vis spectrophotometer, while steady-state fluorescence measurements were conducted using a HORIBA Fluoromax spectrofluorometer. Time-resolved fluorescence spectroscopy was performed with a FLS1000 spectrometer, Edinburgh Instruments, and Delta Flex-01 DD/HORIBA. Chiral separation was performed using Agilent 1260 Infinity II HPLC system. CD spectra were recorded in a JASCO J-815 CD spectrometer with a Peltier MCB-100 and JASCO J-1500 with a Peltier CTU-100. Circularly polarized luminescence (CPL) measurements were carried out with a Jasco CPL-300 spectrometer equipped with a Peltier PTC-510. DLS measurements were performed in Zetasizer ULTRA Malvern with a 633 nm laser at a back scattering angle of  $173^\circ$ .

## S2. Synthesis of Expanded Poly-aza[9]helicenes Precursors

### Synthesis of 2,7-di-tert-butylpyrene (2a)<sup>S2</sup>

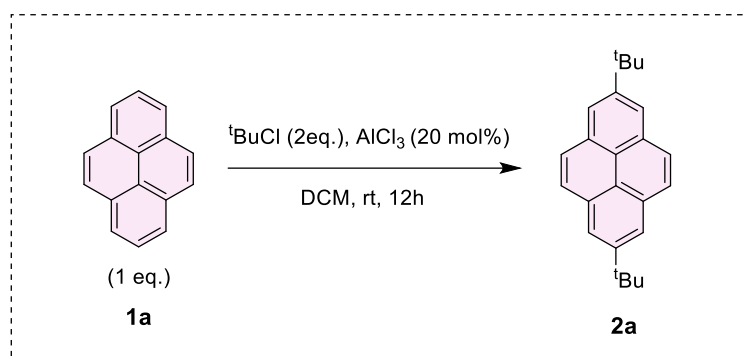

**Scheme S1.** Synthesis of **2a**.

Pyrene (**1a**) (2.042 g, 10 mmol) was taken in a 100 mL two-neck RB, dissolved in 40 mL of dichloromethane. While being stirred and maintaining the temperature of 5 °C, AlCl<sub>3</sub> (0.266 g, 20 mol%) was added to the mixture. The Ar atmosphere was maintained during the whole process. Then, tBuCl (1.849 g, 20 mmol) dissolved in 6 mL of CH<sub>2</sub>Cl<sub>2</sub> was added to the mixture, maintaining the Ar atmosphere. Further, the mixture was stirred at room temperature for 12 h. The organic part was separated by extraction with CHCl<sub>3</sub> and dried under reduced pressure. Yield: 2.808 g, 90%.

<sup>1</sup>H NMR (400 MHz, CDCl<sub>3</sub>) δ 8.18 (s, 4H), 8.02 (s, 4H), 1.58 (s, 18H). The NMR data were compared with those of a previously reported compound in the literature.<sup>S2</sup>

### Synthesis of 2,7-di-tert-butylpyrene-4,5-dione (3a)<sup>[S2]</sup>

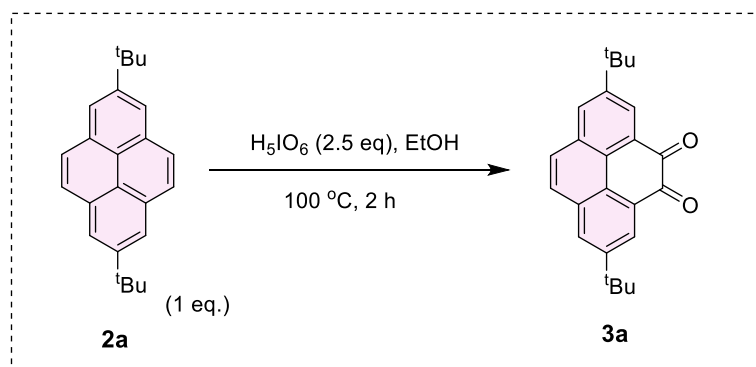

**Scheme S2.** Synthesis of **3a**.

2,7-di-tert-butylpyrene (**2a**) (2.040 g, 6.48 mmol) and periodic acid (3.700 g, 16.23 mmol) were dissolved in 90 mL of ethanol. The mixture was refluxed for 2 hours at 100 °C under an N<sub>2</sub> atmosphere. After that red-colored reaction mixture was cooled to room temperature, and 70 mL of water and 50 mL, 20% Na<sub>2</sub>S<sub>2</sub>O<sub>3</sub> were added successively. The mixture was stirred for 30 minutes below 5 °C. The organic part was extracted with CHCl<sub>3</sub> and dried using a rotavapor. Then the crude mixture was purified using silica gel column chromatography with a CHCl<sub>3</sub>/hexane (40%–100%) solvent system. Yield = 1.445 g, 64%.

<sup>1</sup>H NMR (400 MHz, CDCl<sub>3</sub>) δ 8.55 (d, *J* = 2.0 Hz, 2H), 8.12 (d, *J* = 2.0 Hz, 2H), 7.80 (s, 2H), 1.49 (s, 18H).

### Synthesis of 2,7-di-tert-butylpyrene-[4,5-*d*]-imidazole (**4a**)<sup>S3</sup>

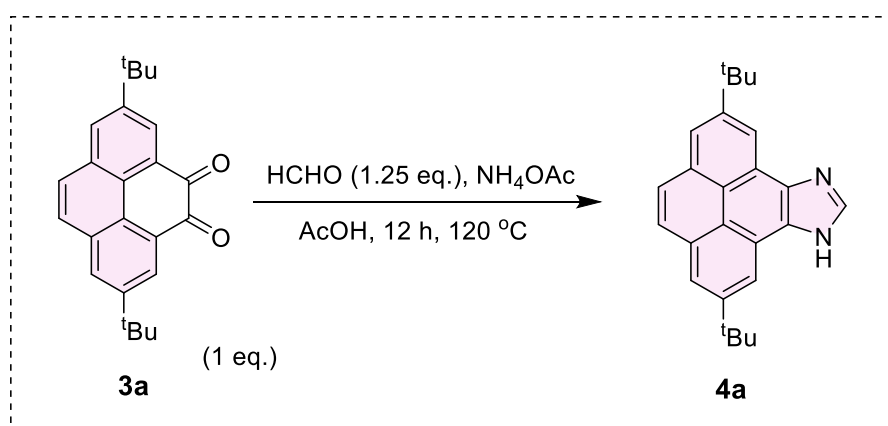

Scheme S3. Synthesis of **4a**.

A mixture of **3a** (1.500 g, 4.35 mmol), NH<sub>4</sub>OAc (7.200 g, 91.2 mmol), HCHO (408 μL of a 37% aq. solution, 5.4 mmol), and AcOH (40 mL) was refluxed under aerobic conditions for 12 hours at 120 °C. Distilled water (60 mL) was added to the mixture after cooling it to room temperature, which produced a brown precipitate. The mixture was then neutralized with a 25% aqueous ammonia solution. The precipitate was filtered, washed with sufficient water, and dried in the oven at 90 °C for 5 hours. Yield: 1.236 g, 80%.

<sup>1</sup>H NMR (400 MHz, DMSO-*d*<sub>6</sub>) δ 13.64 (s, broad, 1H), 8.76 (s, 2H), 8.42 (s, 1H), 8.21 (s, 2H), 8.11 (s, 2H), 1.57 (s, 18H).

## Synthesis of 2,6-bis(2,7-di-tert-butyl-9H-pyreno[4,5-d]-imidazol-9-yl) pyridine (PYBIM)

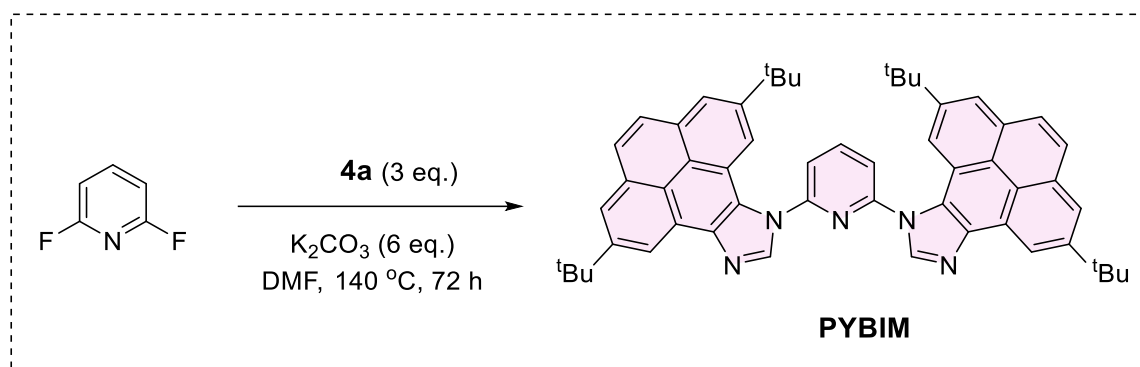

**Scheme S4.** Synthesis of PYBIM.

The mixture of **4a** (1.000 g, 2.82 mmol), 2,7-difluoropyridine (85.2  $\mu$ L, 0.94 mmol), K<sub>2</sub>CO<sub>3</sub> (0.779 g, 5.64 mmol), and DMF (5 mL) was taken in a pressure tube. The mixture was refluxed at 140 °C for 72 hours. The mixture was cooled to room temperature, and water (40 mL) was added and extracted with DCM (40 mL x 2). The organic part was further extracted twice with water (50 mL) to get rid of DMF. The organic part was dried and purified using a silica gel column chromatography with a MeOH/CHCl<sub>3</sub> (1-5%) solvent system. Yield: 0.492 g, 68%.

<sup>1</sup>H NMR (400 MHz, CDCl<sub>3</sub>)  $\delta$  9.06 (s, 2H), 8.53 (s, 2H), 8.36 (t,  $J$  = 7.2 Hz, 1H), 8.25 (d,  $J$  = 12.1 Hz, 4H), 8.14 - 8.07 (m, 4H), 8.03 (d,  $J$  = 11.8 Hz, 2H), 7.94 (d,  $J$  = 7.5 Hz, 2H), 1.65 (s, 18H), 1.34 (s, 18H). <sup>13</sup>C NMR (176 MHz, CDCl<sub>3</sub>)  $\delta$  150.7, 149.7, 147.9, 142.1, 141.2, 140.4, 132.1, 131.5, 128.3, 127.8, 126.0, 125.9, 122.2, 122.1, 122.0, 121.4, 119.7, 117.5, 117.2, 35.6, 35.4, 32.1, 32.0. HRMS (ESI, positive ion)  $m/z$ : [M + H]<sup>+</sup> Calculated, 784.4301; Found, 784.4371.

**Note:** The pyridine ring protons appeared as triplet at 8.36 ppm, with 1H integration, and doublet at 7.94 ppm, with 2H integration. and the imidazole ring protons appeared at singlet at 9.06 ppm, with 2H integration.

### S3. Synthesis of Expanded Poly-aza[9]helicenes HELI-1 and HELI-2

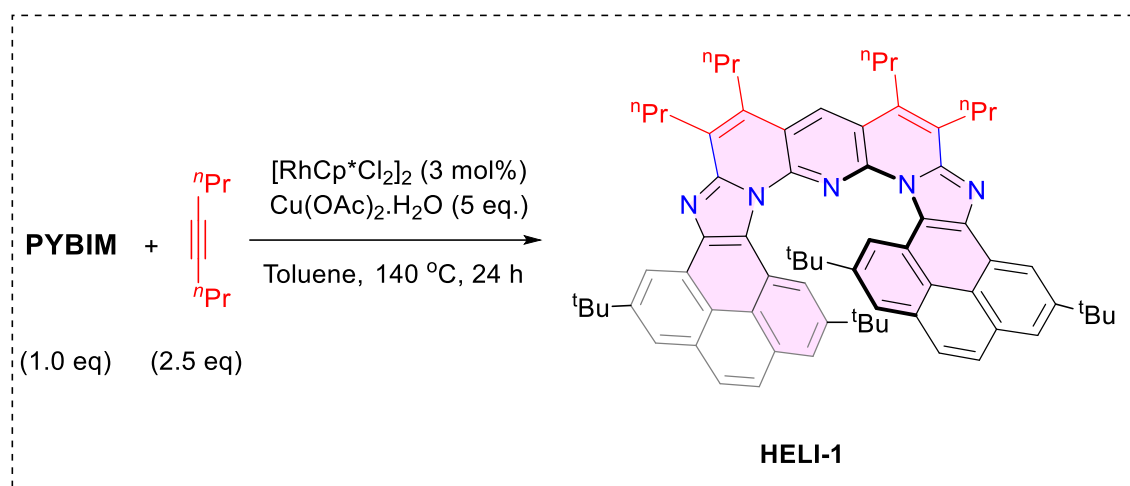

**Scheme S5.** Synthesis of **HELI-1** using catalytic double rolover  $\pi$ -expansion strategy.

A mixture of **PYBIM** (40 mg, 0.05 mmol), [RhCp\*Cl<sub>2</sub>]<sub>2</sub> (3 mol%), and Cu(OAc)<sub>2</sub>·H<sub>2</sub>O, (50 mg, 0.25 mmol) was taken in an oven-dried pressure tube and 2 mL of dried toluene to it. Further, 4-octyne (19  $\mu$ L, 2.5 eq.) was added to the mixture. Next, the mixture was refluxed at 140 °C for 24 hours. After cooling the reaction mixture to room temperature, 8 mL of saturated aqueous K<sub>2</sub>CO<sub>3</sub> solution was added to remove Cu-salts. The organic part was extracted twice using CHCl<sub>3</sub> and dried under reduced pressure. The crude mixture was subjected to column chromatography using a CHCl<sub>3</sub>/hexane 30 – 80 % solvent system to get the yellow-colored product. Yield: 31 mg, 62%.

<sup>1</sup>H NMR (400 MHz, CDCl<sub>3</sub>)  $\delta$  9.23 (s, 2H), 9.02 (s, 1H), 8.94 (s, 2H), 8.19 (s, 2H), 7.91 (d, *J* = 8.8 Hz, 2H), 7.72 (d, *J* = 8.8 Hz, 2H), 7.38 (s, 2H), 3.62 – 3.47 (m, 4H), 3.40 – 3.26 (m, 4H), 1.72 (s, 18H), 1.01 – 0.80 (m, 20H), 0.25 (s, 18H). <sup>13</sup>C NMR (176 MHz, CDCl<sub>3</sub>)  $\delta$  149.4, 148.5, 146.2, 141.9, 140.0, 130.8, 130.5, 129.5, 129.0, 127.6, 126.3, 126.2, 125.9, 125.8, 125.5, 122.2, 122.2, 121.9, 121.0, 118.9, 117.4, 117.3, 35.3, 33.9, 31.9, 30.2, 29.9, 29.5, 23.8, 23.4, 14.6, 14.4, 0.8. HRMS (APCI, positive ion) *m/z*: [M + H]<sup>+</sup> Calculated, 1000.6252; Found, 1000.6234.

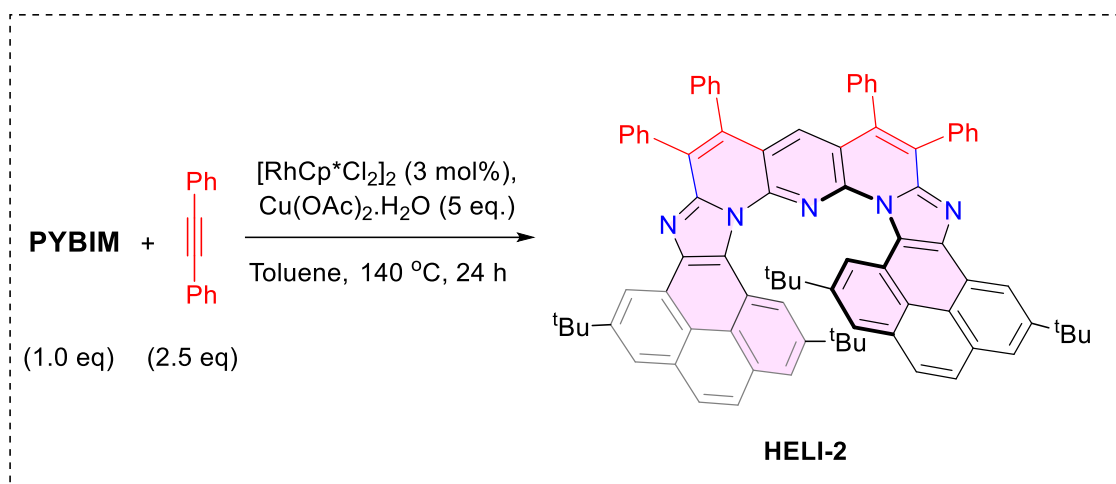

**Scheme S6.** Synthesis of **HELI-2** via catalytic double rollover  $\pi$ -expansion strategy.

A mixture of **PYBIM** (40 mg, 0.05 mmol),  $[\text{RhCp}^*\text{Cl}_2]_2$  (3 mol%),  $\text{Cu(OAc)}_2\cdot\text{H}_2\text{O}$  (50 mg, 0.25 mmol), and diphenylacetylene (22 mg, 2.5 eq.) was taken in a pressure tube and dissolved in 2 mL of dried toluene. Next, the mixture was refluxed at 140 °C for 24 hours. After cooling the reaction mixture to room temperature, 8 mL of saturated aqueous  $\text{K}_2\text{CO}_3$  solution was added to remove Cu-salts. The organic part was extracted twice using  $\text{CHCl}_3$  and dried under reduced pressure. The crude mixture was subjected to column chromatography using a  $\text{CHCl}_3$ /hexane 40 - 70% solvent system to get a pure product. Yield: 41 mg, 73%.

$^1\text{H NMR}$  (400 MHz,  $\text{CDCl}_3$ )  $\delta$  9.10 (d,  $J = 1.3$  Hz, 2H), 9.03 (s, 2H), 8.46 (s, 1H), 8.20 (d,  $J = 1.4$  Hz, 2H), 7.94 (d,  $J = 8.9$  Hz, 2H), 7.76 (d,  $J = 8.9$  Hz, 2H), 7.66 (d,  $J = 7.0$  Hz, 4H), 7.42 (s, 2H), 7.42 – 7.26 (m, 16H), 1.64 (s, 18H), 0.32 (s, 18H).  $^{13}\text{C NMR}$  (176 MHz,  $\text{CDCl}_3$ )  $\delta$  149.1, 148.8, 146.5, 143.2, 141.1, 137.2, 136.3, 135.7, 135.2, 132.0, 131.2, 131.1, 130.9, 130.8, 129.9, 128.4, 128.1, 127.9, 127.9, 127.8, 127.7, 126.8, 126.3, 125.7, 122.8, 122.8, 122.5, 122.4, 121.7, 119.6, 118.7, 118.3, 35.6, 34.3, 32.1, 30.4. **HRMS** (APCI, positive ion)  $m/z$ :  $[\text{M} + \text{H}]^+$  Calculated, 1136.5600; Found, 1136.5626.

**Note:** The absence of the pyridine doublet peak at 7.94 ppm (for 2 protons) and the imidazole singlet peak at 9.06 ppm (for 2 protons), along with the appearance of a new singlet peak at 9.02 ppm (for **HELI-1**) and at 8.46 ppm (for **HELI-2**) for the central pyridine unique proton, in the  $^1\text{H NMR}$  spectra of **HELI-1** and **HELI-2** in  $\text{CDCl}_3$  indicated the formation of the desired rollover-annulated compounds. Interestingly, the signal at 0.25 ppm (for **HELI-1**) and at 0.32 ppm (for **HELI-2**) were expected for the inner  $^t\text{Bu}$  groups, as

the chemical shifts were highly shielded by the ring current of the two terminal overlapping rings of the azahelicene backbone. In contrast, the protons of the corresponding outer <sup>1</sup>Bu groups appeared at 1.72 ppm (for **HELI-1**) and 1.64 ppm (for **HELI-2**).

## S4. Single Crystal X-Ray Diffraction Analysis

Table S1: Crystal data and structure refinement for HELI-1.

|                                                |                                                                |
|------------------------------------------------|----------------------------------------------------------------|
| Identification code                            | HELI-1                                                         |
| Empirical formula                              | $C_{71}H_{77}N_5O_{0.5}Cl_{0.5}$                               |
| Formula weight                                 | 1026.10                                                        |
| Temperature/K                                  | 100.0                                                          |
| Crystal system                                 | triclinic                                                      |
| Space group                                    | P-1                                                            |
| a/Å                                            | 13.162(3)                                                      |
| b/Å                                            | 14.991(4)                                                      |
| c/Å                                            | 16.491(4)                                                      |
| $\alpha/^\circ$                                | 79.736(12)                                                     |
| $\beta/^\circ$                                 | 78.645(9)                                                      |
| $\gamma/^\circ$                                | 66.662(10)                                                     |
| Volume/Å <sup>3</sup>                          | 2911.0(13)                                                     |
| Z                                              | 2                                                              |
| $\rho_{\text{calc}}/\text{g}/\text{cm}^3$      | 1.171                                                          |
| $\mu/\text{mm}^{-1}$                           | 0.091                                                          |
| F(000)                                         | 1101.0                                                         |
| Crystal size/mm <sup>3</sup>                   | 0.028 × 0.019 × 0.009                                          |
| Radiation                                      | MoK $\alpha$ ( $\lambda = 0.71073$ )                           |
| 2 $\Theta$ range for data collection/ $^\circ$ | 3.95 to 60.254                                                 |
| Index ranges                                   | $-18 \leq h \leq 18, -21 \leq k \leq 21, -23 \leq l \leq 23$   |
| Reflections collected                          | 158115                                                         |
| Independent reflections                        | 17080 [ $R_{\text{int}} = 0.0812, R_{\text{sigma}} = 0.0462$ ] |
| Data/restraints/parameters                     | 17080/24/719                                                   |
| Goodness-of-fit on $F^2$                       | 1.082                                                          |
| Final R indexes [ $I \geq 2\sigma(I)$ ]        | $R_1 = 0.1120, wR_2 = 0.3035$                                  |
| Final R indexes [all data]                     | $R_1 = 0.1342, wR_2 = 0.3218$                                  |

## Structural analysis of HELI-1

$d_{AI}$  = The vertical distance between the centroid of the ring A and ring I.

$\theta_{A-I}$  = The intersecting angle between two terminal ring A and I

$\langle \phi_{AE} \rangle$  = Mean torsion angle from ring A to ring E

$\langle \phi_{IE} \rangle$  = Mean torsion angle from ring I to ring E

$d_{A-E}$  = Distance from the centroid of ring A to plane E

$d_{I-E}$  = Distance from the centroid of ring I to the plane of ring E

$\theta_{A-E} / \theta_{K-E}$  = The intersecting angle between two terminal ring and the central plane along ring F

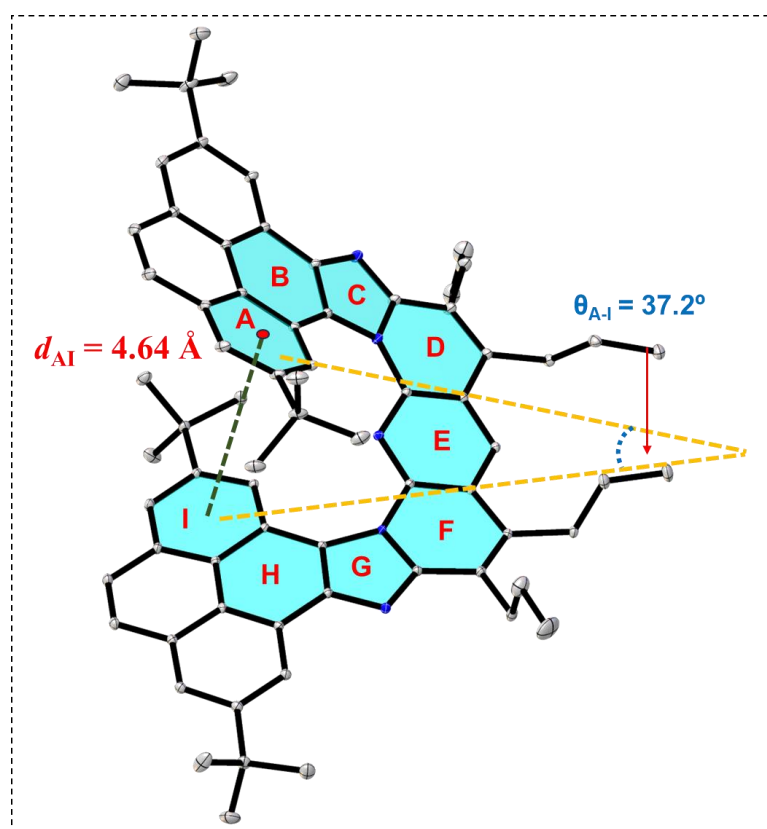

**Figure S1a.** Crystal structure of HELI-1 (top view, H-atoms and free solvents are omitted for clarity). *P*-isomer is shown.

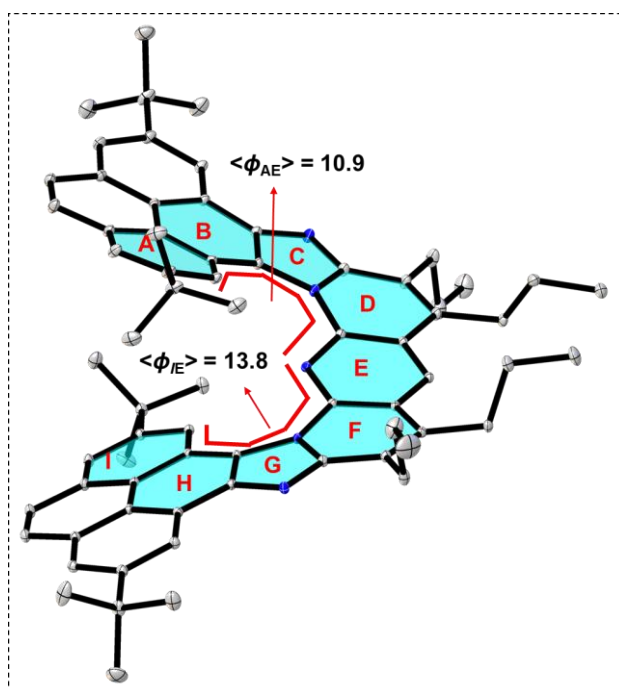

**Figure S1b.** Crystal structure of HELI-1 (top view, H-atoms and free solvents are omitted for clarity). *P*-isomer is shown.

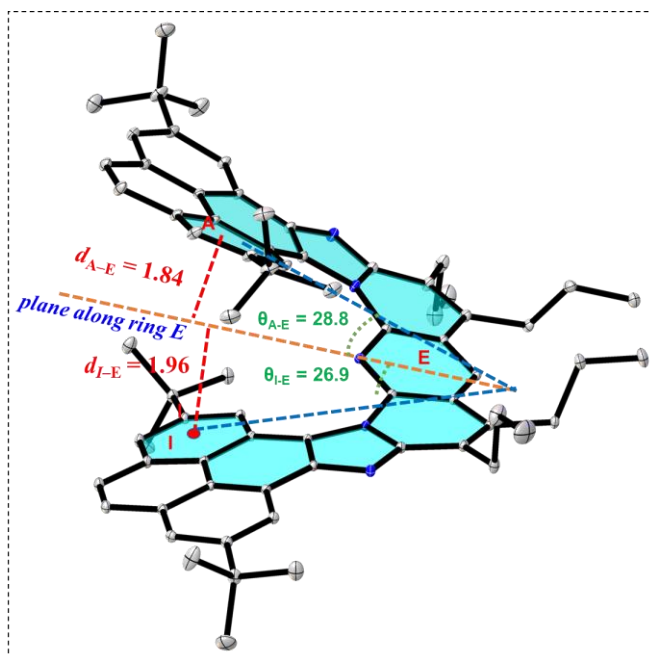

**Figure S1c.** Crystal structure of HELI-1 (top view, H-atoms and free solvents are omitted for clarity). *P*-isomer is shown.

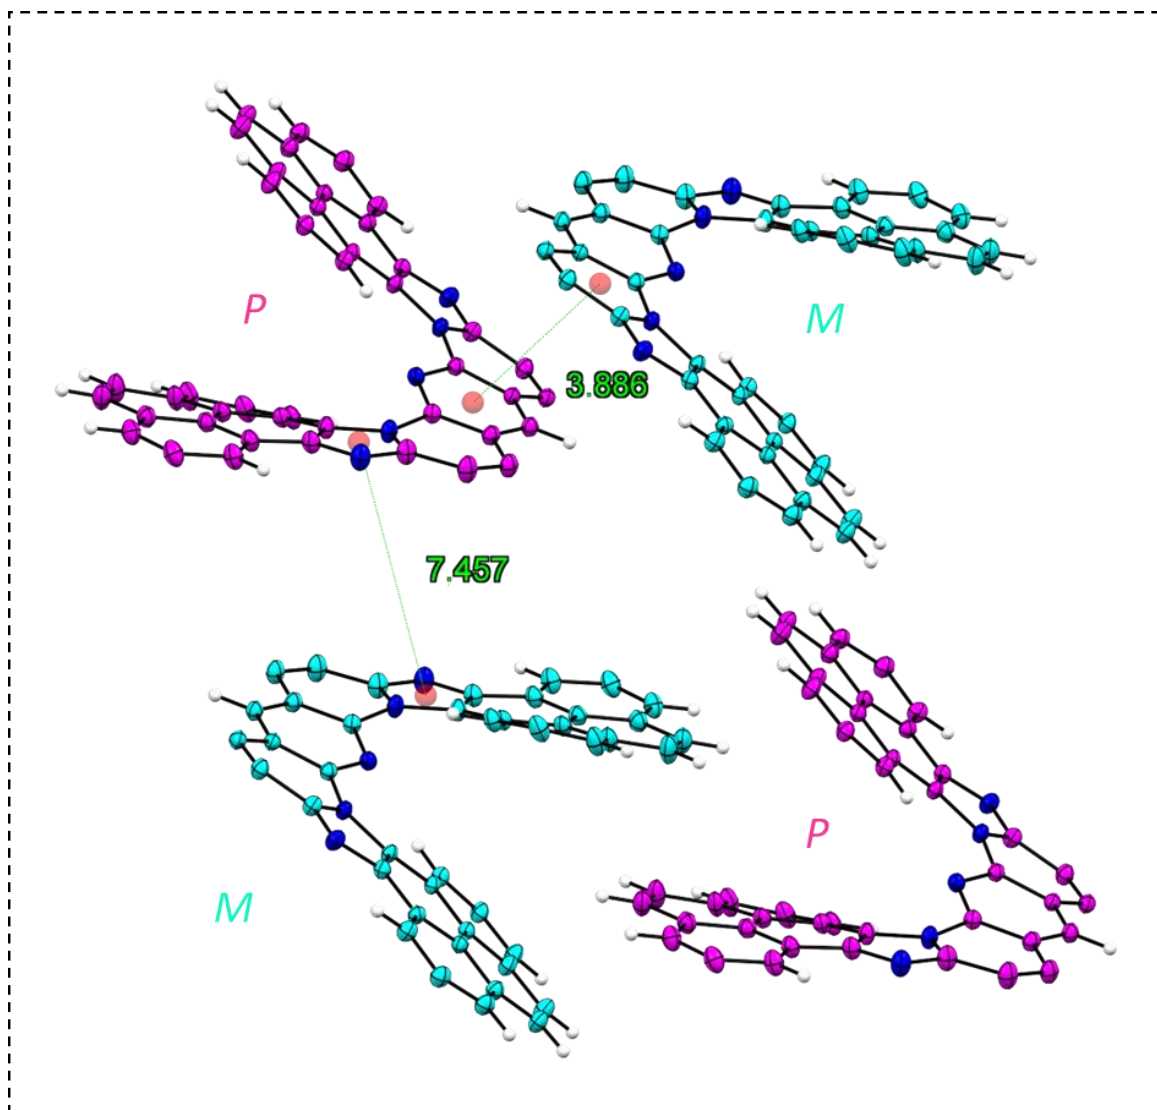

**Figure S1d.** Crystal packing structure of HELI-1 (top view, H-atoms, <sup>t</sup>Bu groups, and free solvents are omitted for clarity; the distances shown are centroid to centroid distance).

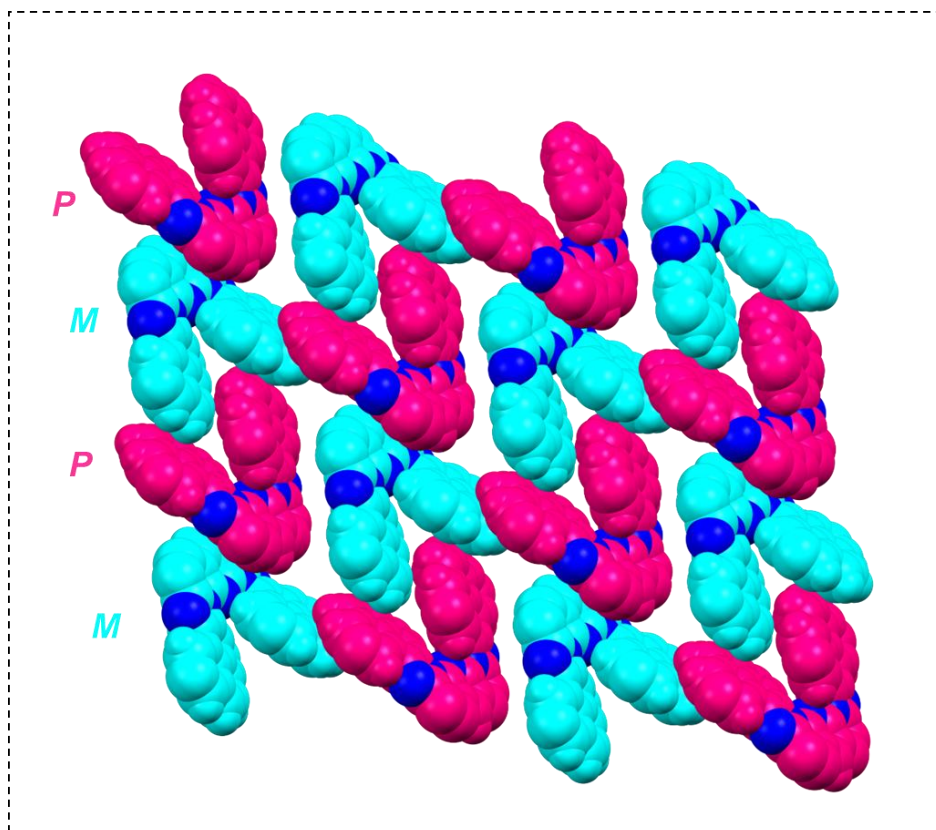

**Figure S1e.** Crystal packing structure of HELI-1 (top view, H-atoms, <sup>t</sup>Bu groups, and free solvents are omitted for clarity; the distances shown are centroid to centroid distance).

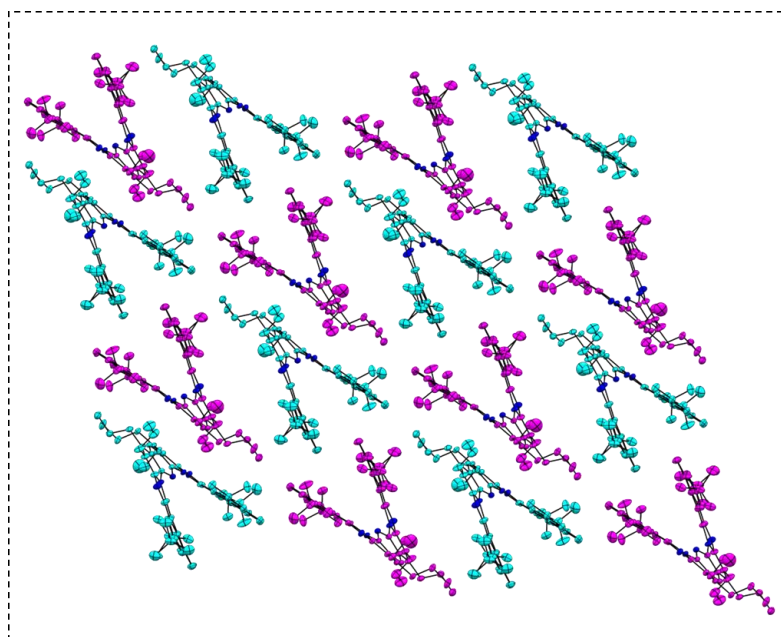

**Figure S1f.** Crystal packing structure of HELI-1 (top view, H-atoms and free solvents are omitted for clarity).

## Structural analysis of HELI-2

We attempted single-crystal X-ray diffraction analysis of HELI-2 many times. Several crystallization methods (diffusion, evaporation, solvent layering) and solvent screening have been tried. Among them the best data were obtained by diffusion method with hexane as outer solvent, and 1% MeOH + DCM as inner solvent. However, the quality of the crystal data is still poor. A couple of side-chain carbon atoms have been modelled as disordered. There are a few A- and B-level alerts due to poor diffraction quality. The structure has been shown below.

$d_{AI}$  = The vertical distance between the centroid of the ring A and ring I.

$\theta_{A-I}$  = The intersecting angle between two terminal ring A and I

$\langle \phi_{AE} \rangle$  = Mean torsion angle from ring A to ring E

$\langle \phi_{IE} \rangle$  = Mean torsion angle from ring I to ring E

$d_{A-E}$  = Distance from the centroid of ring A to plane E

$d_{I-E}$  = Distance from the centroid of ring I to the plane of ring E

$\theta_{A-E} / \theta_{K-E}$  = The intersecting angle between two terminal ring and the central plane along ring F

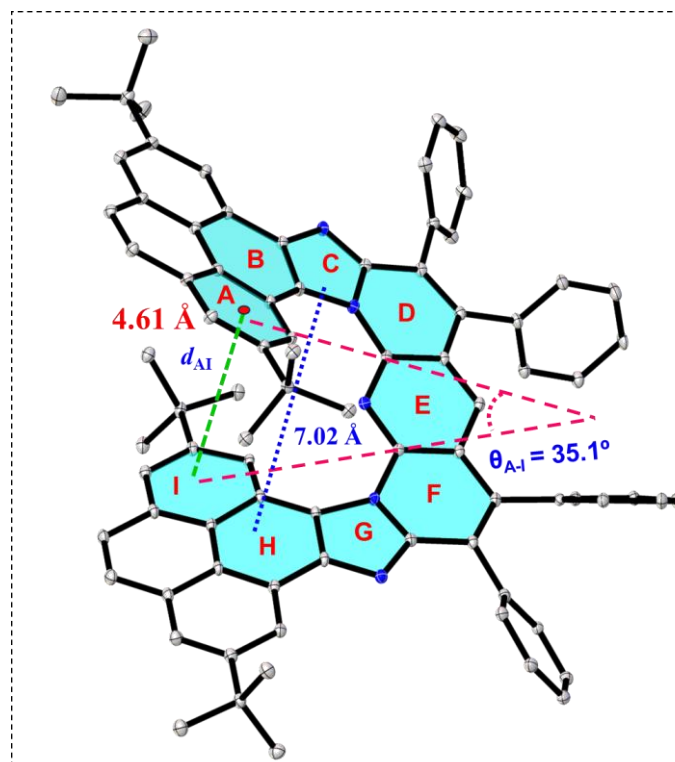

Figure S2a. Crystal structure of HELI-2 (top view, H-atoms and free solvents are omitted for clarity). *P*-isomer is shown.

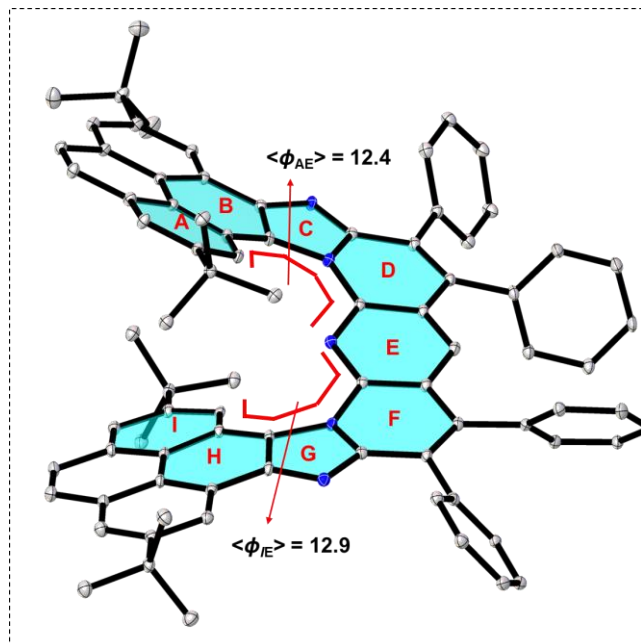

Figure S2b. Crystal structure of HELI-2 (top view, H-atoms and free solvents are omitted for clarity). *P*-isomer is shown.

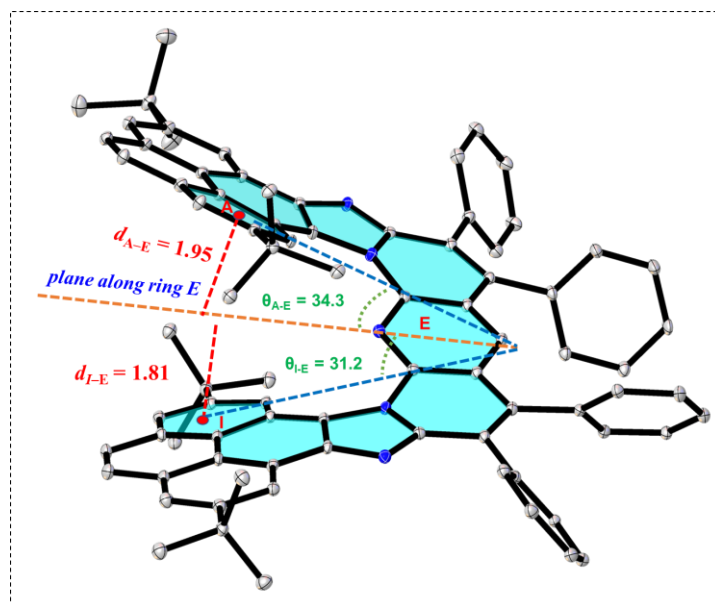

Figure S2c. Crystal structure of HELI-2 (top view, H-atoms and free solvents are omitted for clarity). *P*-isomer is shown.

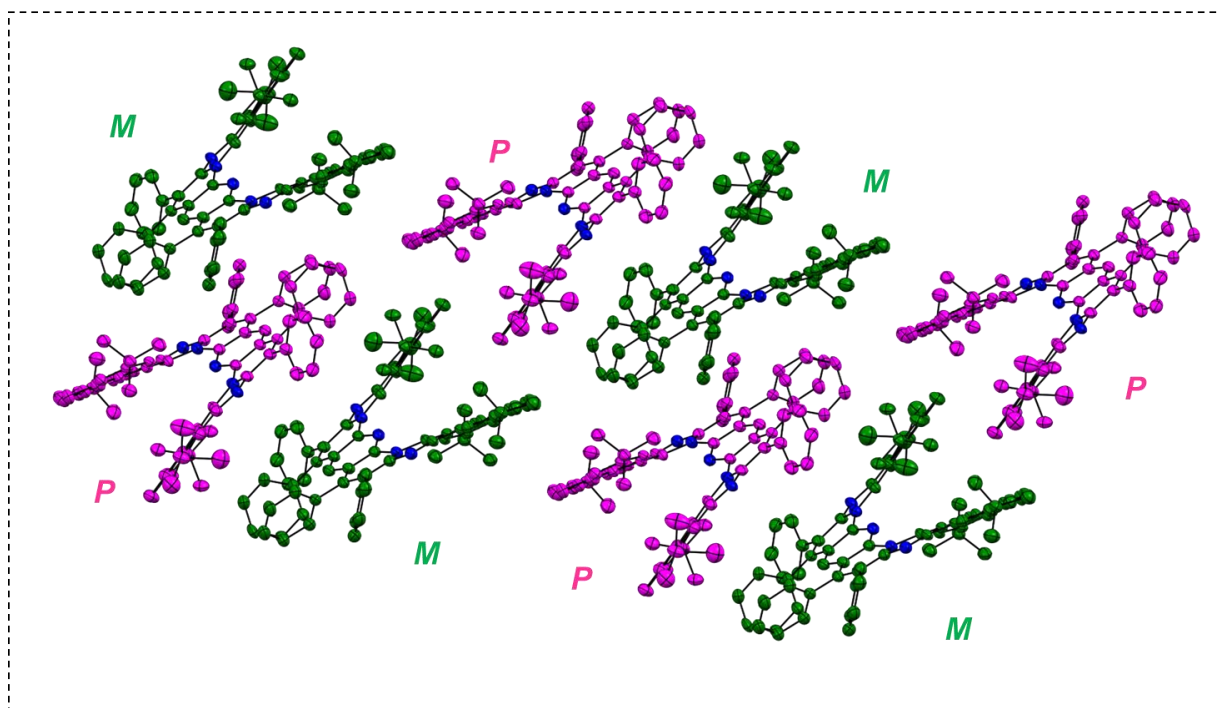

Figure S2d. Crystal packing structure of HELI-2 (top view, H-atoms and free solvents are omitted for clarity).

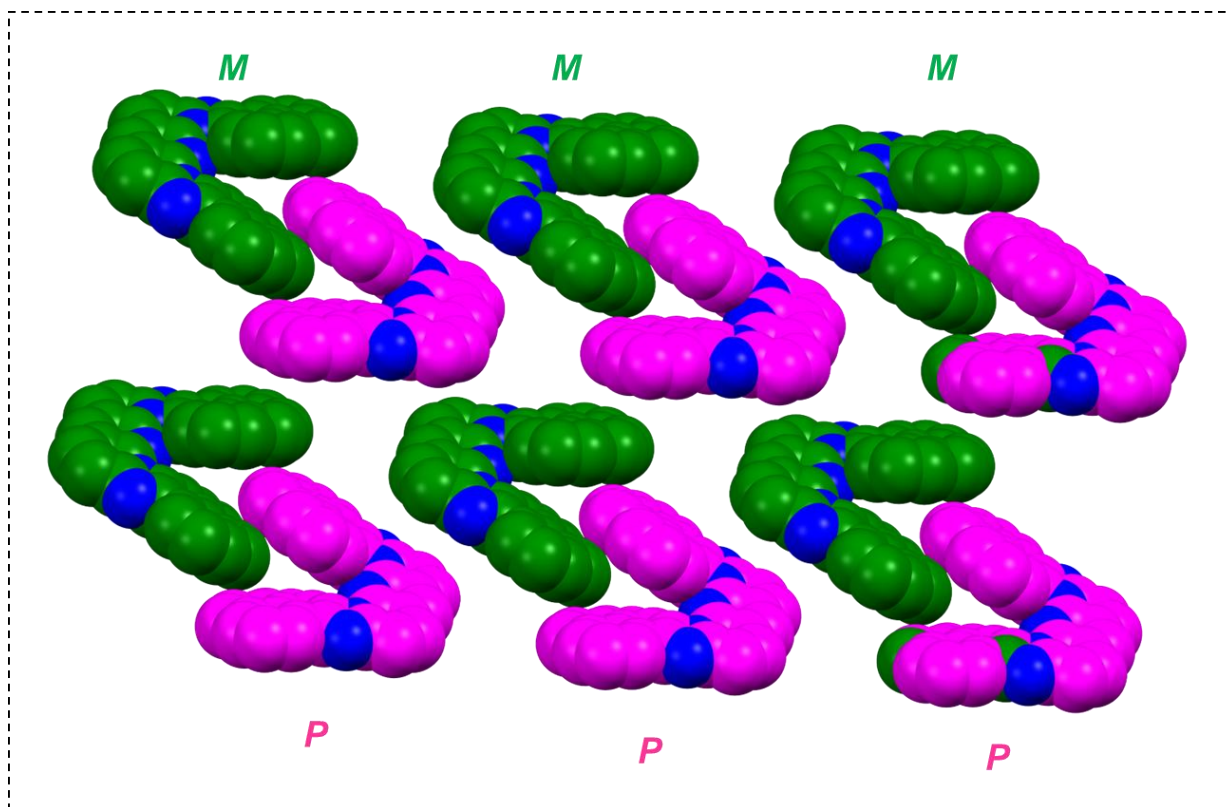

Figure S2e. Crystal packing structure of HELI-2 (top view, H-atoms and free solvents are omitted for clarity).

### S5. Enantiomerization Barrier Calculation

Gaussian 09 software was used to carry out all the computational studies.<sup>S4</sup> Transition state (TS) for the racemization process in the ground state ( $S_0$ ) was calculated at the B3LYP/6-31g(d,p) level of theory. CPCM- $\text{CH}_2\text{Cl}_2$ . The rate constant ( $k$ ) was estimated using Eyring equation as follows:  $k = (k_B T/h) \cdot \exp(-\Delta H^\ddagger/RT) \cdot \exp(\Delta S^\ddagger/R)$ , where  $\Delta H^\ddagger$  and  $\Delta S^\ddagger$  are the activation enthalpy and entropy for the racemization process, respectively,  $T$  is temperature, and  $k_B$ ,  $h$ , and  $R$  are the Boltzman constant, Planck constant, and molar gas constant, respectively.

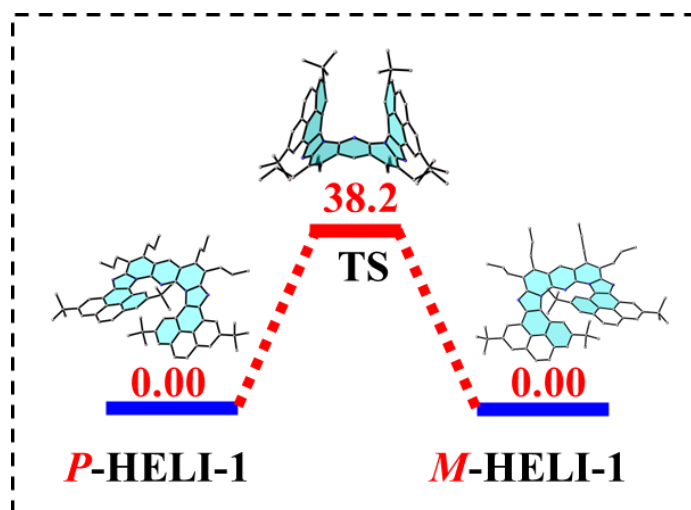

**Figure S3.** Enantiomerization process between (*P*)-HELI-1 and (*M*)-HELI-1 and the relative Gibbs free energy ( $\text{kcal}\cdot\text{mol}^{-1}$ ) calculated at the B3LYP/6-31g(d,p) level of theory. CPCM- $\text{CH}_2\text{Cl}_2$ .

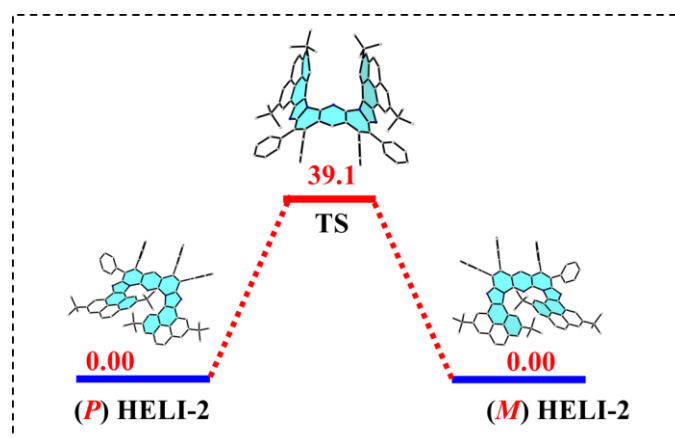

**Figure S4.** Enantiomerization process between (*P*)-HELI-2 and (*M*)-HELI-2 and the relative Gibbs free energy ( $\text{kcal}\cdot\text{mol}^{-1}$ ) calculated at the B3LYP/6-31g(d,p) level of theory. CPCM- $\text{CH}_2\text{Cl}_2$ .

**Table S2.** Thermodynamic parameters of the helicene inversion process at different temperatures for HELI-2

| Temperature (K) | $\Delta H^\ddagger$ ( $\text{kcal}\cdot\text{mol}^{-1}$ ) | $\Delta S^\ddagger$ ( $\text{kcal}\cdot\text{mol}^{-1}\cdot\text{K}^{-1}$ ) | $\Delta G^\ddagger$ ( $\text{kcal}\cdot\text{mol}^{-1}$ ) | $k$ ( $\text{s}^{-1}$ ) | $t_{1/2}$                |
|-----------------|-----------------------------------------------------------|-----------------------------------------------------------------------------|-----------------------------------------------------------|-------------------------|--------------------------|
| 298.15          | 36.9                                                      | $-7.28 \times 10^{-3}$                                                      | 39.1                                                      | $1.31 \times 10^{-16}$  | $1.68 \times 10^8$ years |
| 373.15          | 36.8                                                      | $-7.66 \times 10^{-3}$                                                      | 39.6                                                      | $4.54 \times 10^{-11}$  | $4.84 \times 10^2$ years |

|        |      |                        |      |                       |              |
|--------|------|------------------------|------|-----------------------|--------------|
| 473.15 | 36.6 | $-8.03 \times 10^{-3}$ | 40.4 | $2.13 \times 10^{-6}$ | 3.76 days    |
| 573.15 | 36.5 | $-8.33 \times 10^{-3}$ | 41.3 | $2.16 \times 10^{-3}$ | 5.34 minutes |

The  $t_{1/2}$  value at various temperatures has been calculated by the Eyring equation as shown below:

$$k = \left(\frac{k_B T}{h}\right) \exp\left(-\frac{\Delta H^\ddagger}{RT}\right) \exp\left(\frac{\Delta S^\ddagger}{R}\right)$$

The activation parameters,

$$\Delta G^\ddagger = 0.062328 \text{ Ha} = 39.11 \text{ kcal}\cdot\text{mol}^{-1}$$

$$\Delta H^\ddagger = 0.058866 \text{ Ha} = 36.938415 \text{ kcal}\cdot\text{mol}^{-1}$$

$$\Delta S^\ddagger = -7.283 \times 10^{-3} \text{ kcal}\cdot\text{mol}^{-1}\text{K}^{-1}$$

Given (298.15 K)

- $R = 0.001987 \text{ kcal}\cdot\text{mol}^{-1}\text{K}^{-1}$
- $k_B = 1.380649 \times 10^{-23} \text{ JK}^{-1}$
- $h = 6.62607015 \times 10^{-34} \text{ J}\cdot\text{s}$

According to equation (1)

$$\frac{k_B T}{h} = \frac{(1.380649 \times 10^{-23}) \text{ J}\cdot\text{K}^{-1}(298.15) \text{ K}}{6.62607015 \times 10^{-34} \text{ J}\cdot\text{s}} = 6.21 \times 10^{12} \text{ s}^{-1}$$

$$RT = (0.001987) \text{ kcal}\cdot\text{K}^{-1}\cdot\text{mol}^{-1}(298.15) \text{ K} = 0.5924 \text{ kcal/mol}$$

$$\frac{\Delta H^\ddagger}{RT} = \frac{36.938415 \text{ kcal/mol}}{0.5924 \text{ kcal/mol}} = 62.35$$

$$\frac{\Delta S^\ddagger}{R} = \frac{-7.283 \times 10^{-3} \text{ kcal}\cdot\text{K}^{-1}\cdot\text{mol}^{-1}}{0.001987 \text{ kcal}\cdot\text{K}^{-1}\cdot\text{mol}^{-1}} = -3.665$$

$$k = \left(\frac{k_B T}{h}\right) \exp\left(-\frac{\Delta H^\ddagger}{RT}\right) \exp\left(\frac{\Delta S^\ddagger}{R}\right)$$

$$k = (6.21 \times 10^{12}) \exp(-62.35) \exp(-3.665)$$

$$= (6.21 \times 10^{12})(8.35 \times 10^{-28})(0.0256)$$

$$\boxed{k = 1.31 \times 10^{-16} \text{ s}^{-1}}$$

### Half-life (first-order racemization)

$$t_{1/2} = \frac{0.693}{k} = \frac{0.693}{1.31 \times 10^{-16}}$$

$$t_{1/2} = 5.29 \times 10^{15} \text{ s}$$

Convert to years:

$$\frac{5.25 \times 10^{15}}{3.154 \times 10^7} = 1.68 \times 10^8 \text{ years}$$

$$k = 1.31 \times 10^{-16} \text{ s}^{-1}$$

$$t_{1/2} \approx 1.7 \times 10^8 \text{ years}$$

### S6. Molecular Spring Constant Calculation

Gaussian 09 software was used to carry out all the theoretical studies.<sup>S4-S5</sup> DFT calculations were performed with the B3LYP exchange-correlation functional by using 6-311g(2d,p) basis set for H, C, and N atoms.<sup>[S5]</sup> Initially, ground state geometry optimizations were carried out at B3LYP/6-31g(2d,p) for **HELI-1** and **HELI-3** in the gas phase to reduce the computational cost. The distance between the two carbon atoms at the end of the molecule was  $r = 5.24 \text{ \AA}$  and  $4.47 \text{ \AA}$  for **HELI-1** and **HELI-3**, respectively. A relaxed potential energy surface was scanned with 10 steps in  $0.2 \text{ \AA}$  increments at B3LYP/6-311g(2d,p) for both molecules. Molecular geometry was optimized in each step with a fixed distance between the two carbon atoms ( $r$ ). The change of potential energy upon elongation of the distance between two carbon atoms is plotted and fitted based on the following equation:

$$y = Ax^2$$

where the coefficient  $A$  has the unit of  $\text{kJ}\cdot\text{mol}^{-1}\cdot\text{\AA}^{-2}$ . By comparing the equation 1 with  $\Delta E = (1/2) \cdot k \cdot (\Delta r^2)$ , where  $E$  = relative energy,  $k$  = force constant, and  $r$  = the elongation of the distance between the two carbon atoms at the edge of the molecule, the force constant  $k$  ( $\text{N}\cdot\text{m}^{-1}$ ) was calculated from  $A$  ( $\text{kJ}\cdot\text{mol}^{-1}\cdot\text{\AA}^{-2}$ ) as follows:  $k = (2 \times 10^{23} \cdot N_A^{-1}) \cdot A$ , where  $N_A$  is the Avogadro constant. From this result, the force constant of the molecular spring was determined.

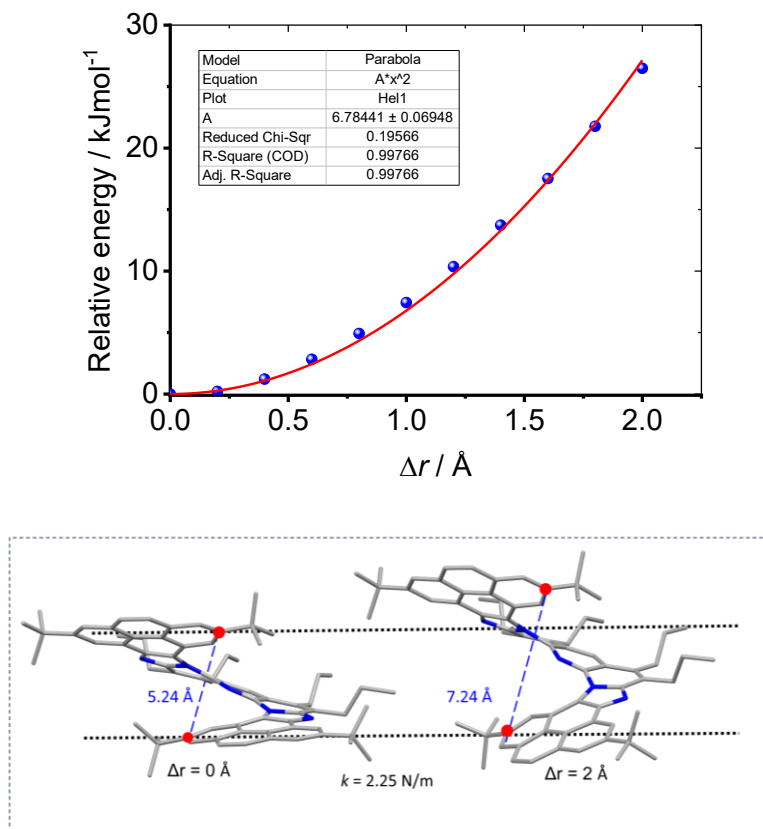

Figure S5a. Spring constant at B3LYP/6-311g (2d,p) level of theory for HELI-1.

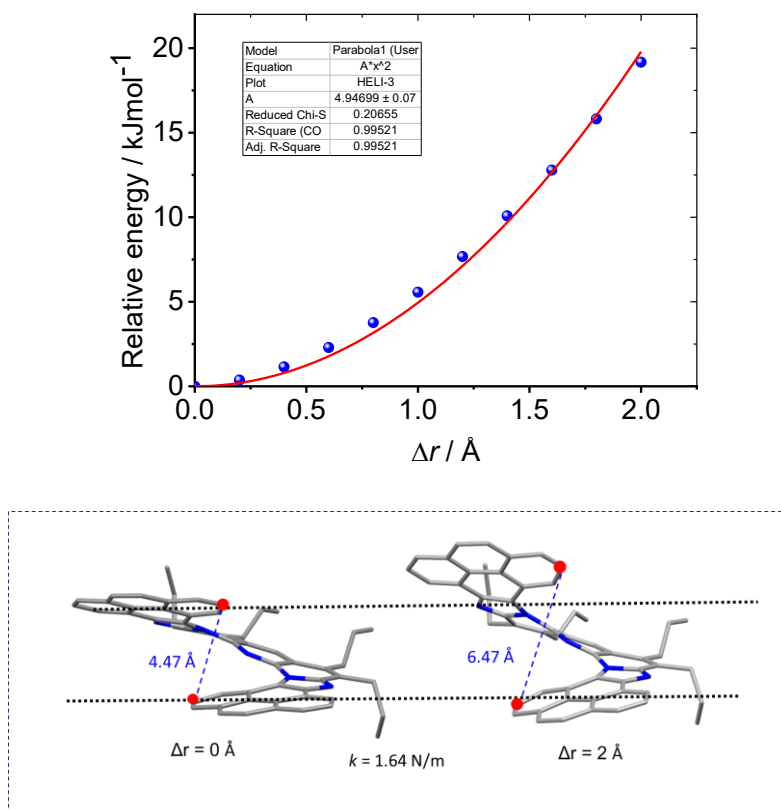

Figure S5b. Spring constant at B3LYP/6-311g (2d,p) level of theory for HELI-3.

## S7. Resolution of HELI-1 and HELI-2 by Chiral HPLC

The *P/M* enantiomers of the poly-aza[9]-helicenes **HELI-1** were separated using an Agilent 1260 Infinity II HPLC system equipped with the CHIRALPAK-IB (250 mm × 4.6 mm) column, and for **HELI-2**, the CHIRALPAK IA-3 (250 mm × 4.6 mm) column. The eluent was n-hexane/isopropanol (90:10) with a 1 mL/min flow rate at 25 °C. The amount of sample injection was 10 μL of an approximate 0.33 mg/mL solution in the corresponding eluent. The chromatograms below were obtained using a detection wavelength of 260 nm.

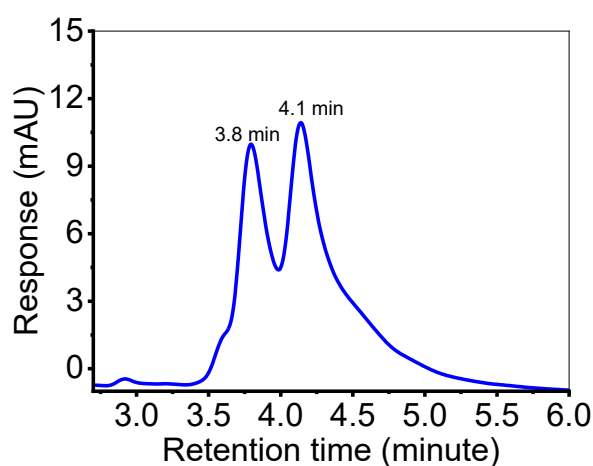

Figure S6. HPLC chromatogram of (*P*)/(*M*)- HELI-1.

### Peak Analysis Data:

| # | Name       | Signal description           | RT (min) | Area (mAU·s) | Area%  | Height (mAU) | Height% |
|---|------------|------------------------------|----------|--------------|--------|--------------|---------|
| 1 | (M)-HELI-1 | VWD1B<br>Wavelength = 260 nm | 3.798    | 126.708      | 42.828 | 7.443        | 48.18   |
| 2 | (P)-HELI-1 | VWD1B<br>Wavelength = 260 nm | 4.139    | 169.145      | 57.172 | 8.004        | 51.82   |

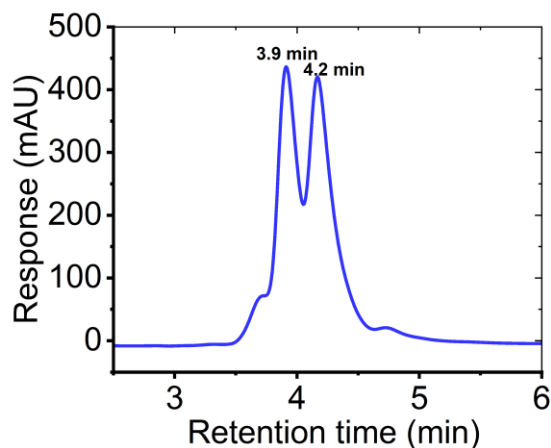

Figure S7. HPLC chromatogram of (P)/(M)- HELI-2.

Peak Analysis Data:

| # | Name       | Signal description           | RT (min) | Area (mAU·s) | Area% | Height (mAU) | Height% |
|---|------------|------------------------------|----------|--------------|-------|--------------|---------|
| 1 | (M)-HELI-2 | VWD1B<br>Wavelength = 260 nm | 3.911    | 4266.48      | 49.68 | 318.84       | 51      |
| 2 | (P)-HELI-2 | VWD1B<br>Wavelength = 260 nm | 4.167    | 4320.54      | 50.31 | 306.35       | 49      |

S8. Spectroscopic Measurements

Steady-state absorption spectra were recorded on Cary 100 UV-Vis spectrophotometer. Conventional quartz cells of 1 cm path length were used for all the measurements. All steady-state fluorescence measurements were carried out on the HORIBA Fluoromax spectrofluorimeter. The fluorescence and UV-Vis spectra were recorded by using a 1.0 cm path-length quartz cuvette. Both excitation and emission slit were kept at 1 nm while recording the fluorescence spectra. All the experiments were carried out at ambient temperature (298K). Fluorescence quantum yields were determined by comparison with Coumarin 30 dye in CH<sub>3</sub>CN ( $\Phi_f = 0.67$ ) for HELI-2 and Rhodamine B in EtOH ( $\Phi_f = 0.49$ ) for the protonated HELI-2 using the following equation:

$$\Phi_{f,i} = \Phi_{f,s} * \frac{F_i}{F_s} * \frac{f_s}{f_i} * \frac{n_i^2}{n_s^2}$$

where  $\Phi_f$  = fluorescence quantum yield, subscript  $i$  denotes sample, and the subscript  $s$  refers to the standard dye,  $F$  = fluorescence integral,  $n$  = refractive index of the solvent,  $f$

is the absorption factor at the excitation wavelength given by the following equation  $f = 1 - 10^{-Abs}$ , where Abs is the absorbance at the excitation wavelength. The excitation wavelength for the **HELI-2** compound was 420 nm.

**Time-resolved fluorescence spectroscopy:** Fluorescence lifetimes were measured on a FLS1000 spectrometer, Edinburgh Instruments, by the time-correlated single-photon-counting 2 (TCSPC) method. A 405 nm LED with a pulse repetition rate of 1 MHz was used as the light source. The instrument response function (IRF) was collected by using a scatterer (Ludox AS40 colloidal silica, Sigma-Aldrich).

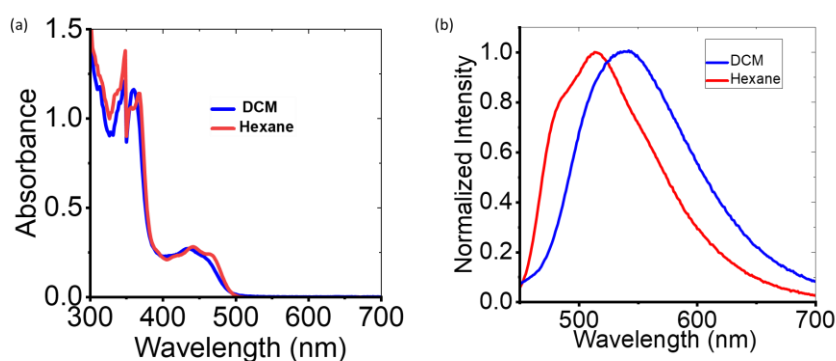

**Figure S8.** (a) Absorption and (b) emission spectra of **HELI-1** in hexane and in dichloromethane (DCM) ( $\lambda_{ex} = 435$  nm). Concentration = 16  $\mu$ M.

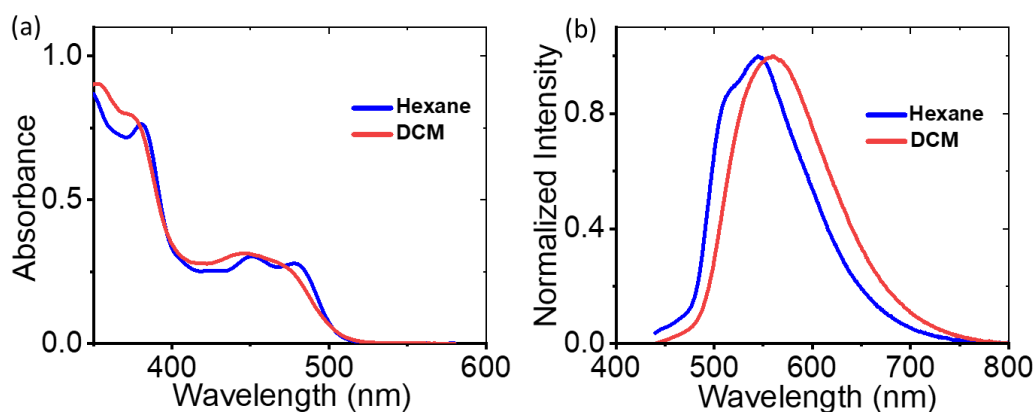

**Figure S9.** (a) Absorption and (b) emission spectra of **HELI-2** in hexane, and in dichloromethane (DCM) ( $\lambda_{ex} = 435$  nm). Concentration = 15 mM.

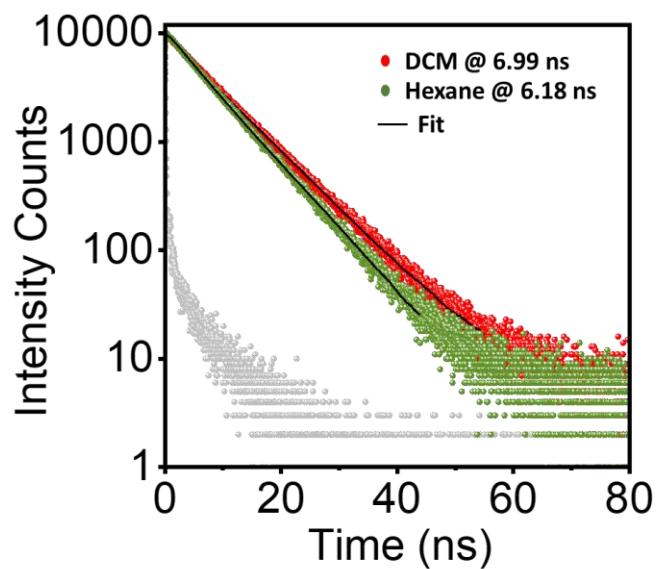

Figure S10. Fluorescence lifetime of HELI-1 (16 mM) in dichloromethane

Table S3. Solvent-dependent photophysical properties of HELI-1

| # | Solvent         | $\lambda_{max}^{abs}$ (nm) | $\lambda_{max}^{em}$ (nm) | $\Phi$ (%) | $\tau$ (ns) |
|---|-----------------|----------------------------|---------------------------|------------|-------------|
| 1 | Hexane          | 435                        | 513                       | 28         | 6.18        |
| 2 | Dichloromethane | 431                        | 540                       | 32         | 6.99        |

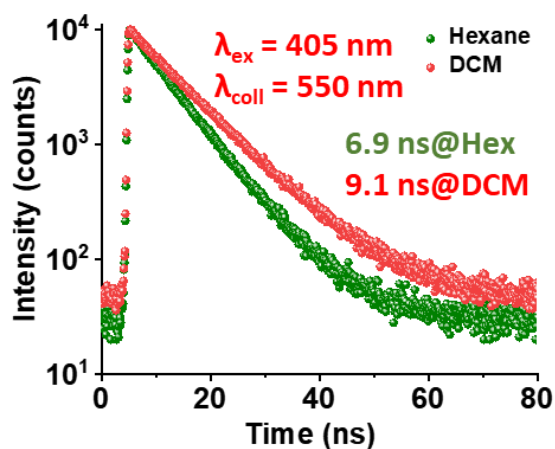

Figure S11. Fluorescence lifetime of HELI-2 (15  $\mu$ M) in dichloromethane.

Table S4. Solvent-dependent photophysical properties of HELI-2

| # | Solvent         | $\lambda_{max}^{abs}$ (nm) | $\lambda_{max}^{em}$ (nm) | $\Phi$ (%) | $\tau$ (ns) |
|---|-----------------|----------------------------|---------------------------|------------|-------------|
| 1 | Hexane          | 450                        | 555                       | 30         | 6.9         |
| 2 | Dichloromethane | 446                        | 560                       | 38         | 9.1         |

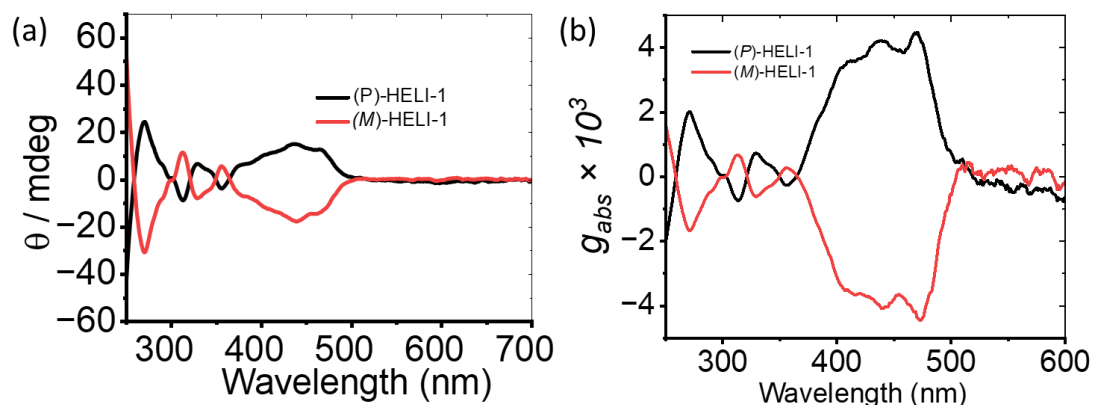

Figure S12. (a) CD spectra of (*P*)-HELI-1 (black) and (*M*)-HELI-1 (red) in DCM. (b) Absorption dissymmetry factors of (*P*)-HELI-1 (black) and (*M*)-HELI-1 (red) in DCM. Concentration = 15  $\mu$ M.

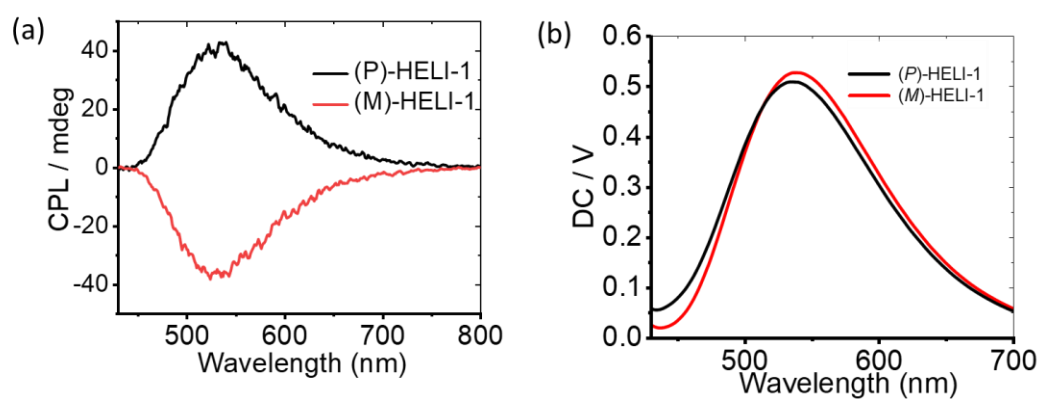

Figure S13. (a) CPL spectra and (b) corresponding DC volt spectra of (*P*)-HELI-1 and (*M*)-HELI-1 (15  $\mu$ M) in DCM ( $\lambda_{ex}$  = 330 nm).

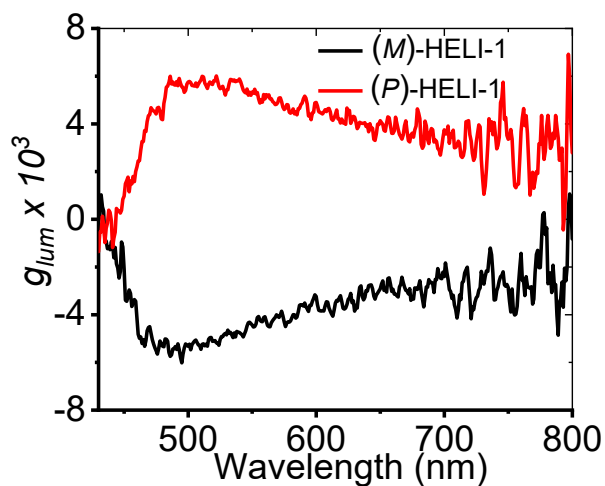

**Figure S14.** Luminescence dissymmetry factors of (*P*)-HELI-1 and (*M*)-HELI-1 in DCM ( $\lambda_{\text{ex}} = 330$  nm).

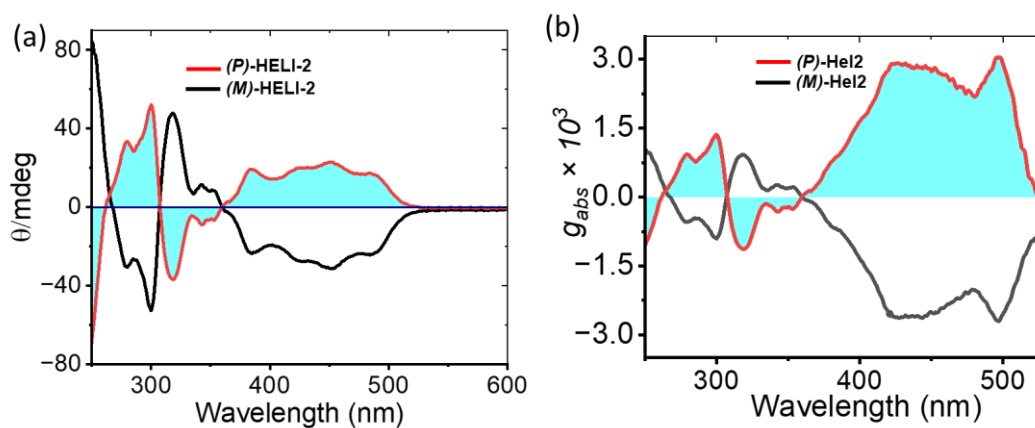

**Figure S15.** (a) CD spectra of (*P*)-HELI-2 (red) and (*M*)-HELI-2 (black) in hexane. (b) Absorption dissymmetry factors of (*P*)-HELI-2 (red) and (*M*)-HELI-2 (black) in hexane. Concentration = 18  $\mu\text{M}$ .

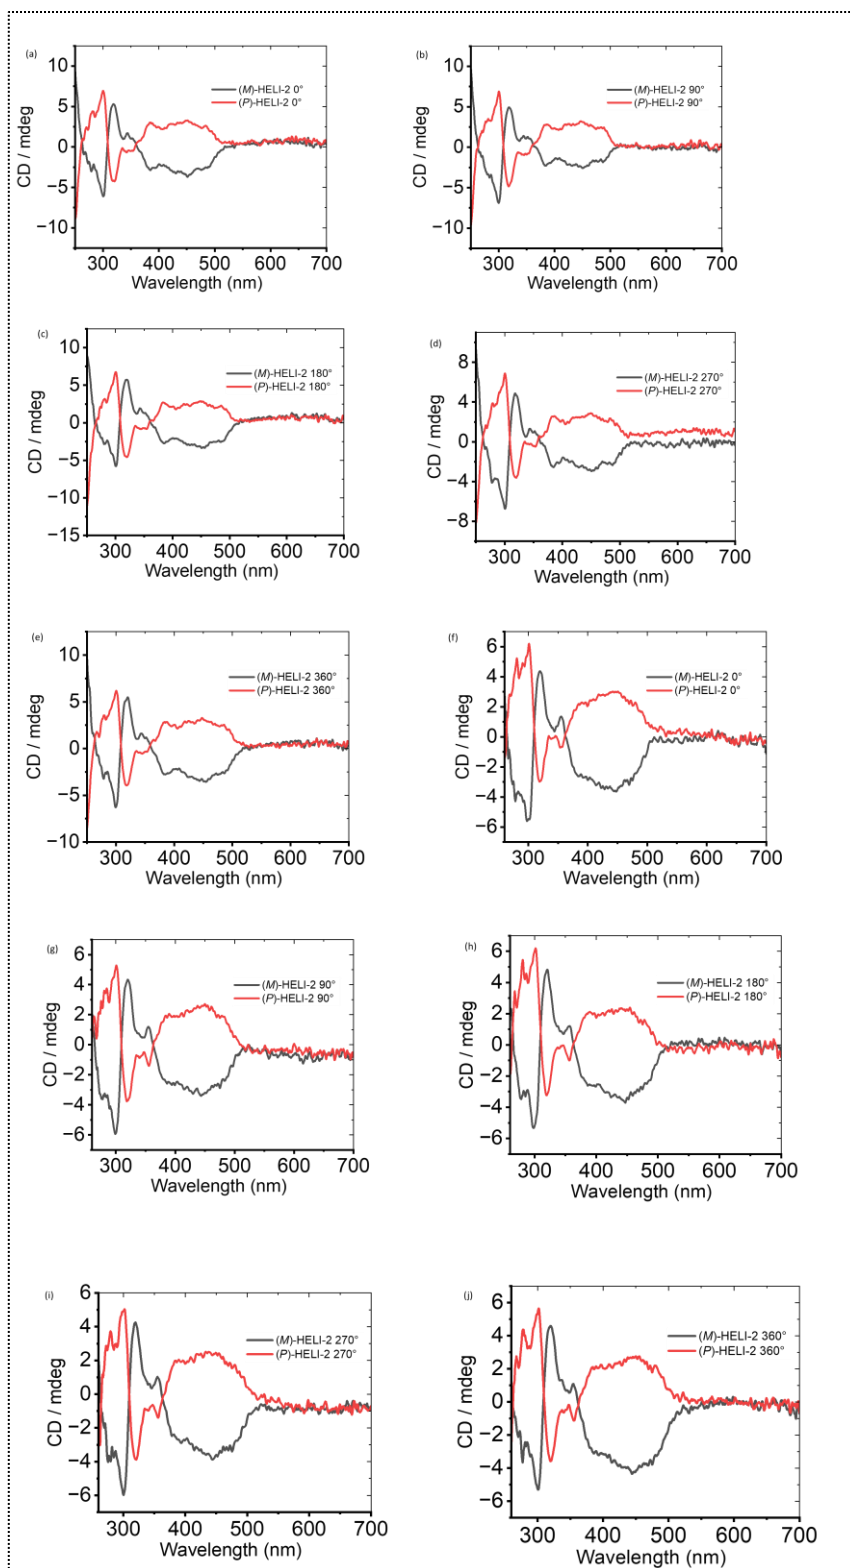

**Figure S16.** (a)–(e) CD spectra of (*P*)-HELI-2 (red) and (*M*)-HELI-2 (black) in hexane after rotation of the cuvette 0° to 360°. Concentration = 2.5  $\mu$ M. (f)–(j) CD spectra of (*P*)-HELI-2 (red) and (*M*)-HELI-2 (black) in dichloromethane after rotation of the cuvette 0° to 360°. Concentration = 2.5  $\mu$ M.

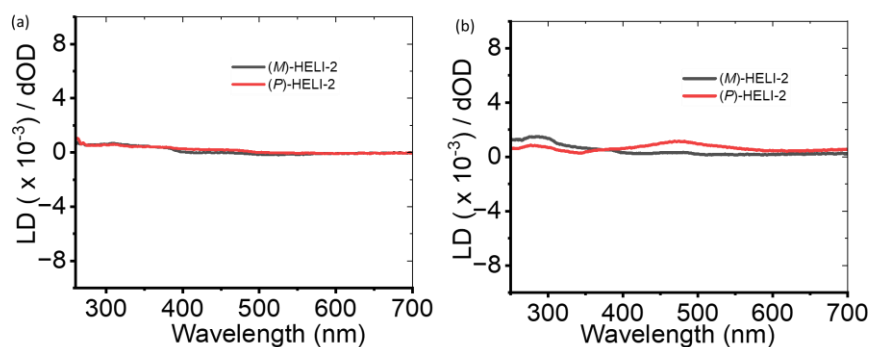

**Figure S17.** (a) LD spectra of (*P*)-HELI-2 (red) and (*M*)-HELI-2 (black) in dichloromethane, (b) LD spectra of (*P*)-HELI-2 (red) and (*M*)-HELI-2 (black) in hexane. Concentration = 2.5  $\mu$ M.

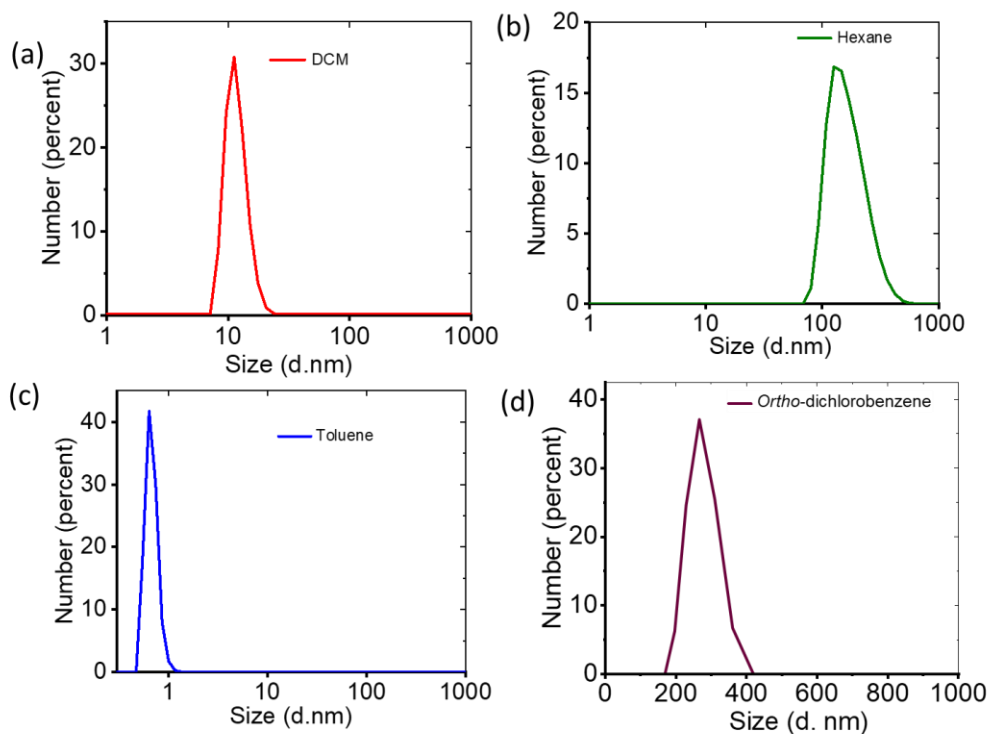

**Figure S18.** DLS of HELI-2 at different solvents (DCM, hexane, toluene, and *ortho*-dichlorobenzene) with 18  $\mu$ M concentration.

**Inference:** HELI-2 is monomeric in DCM and toluene, and it is in an aggregated state in hexane and *ortho*-dichlorobenzene.

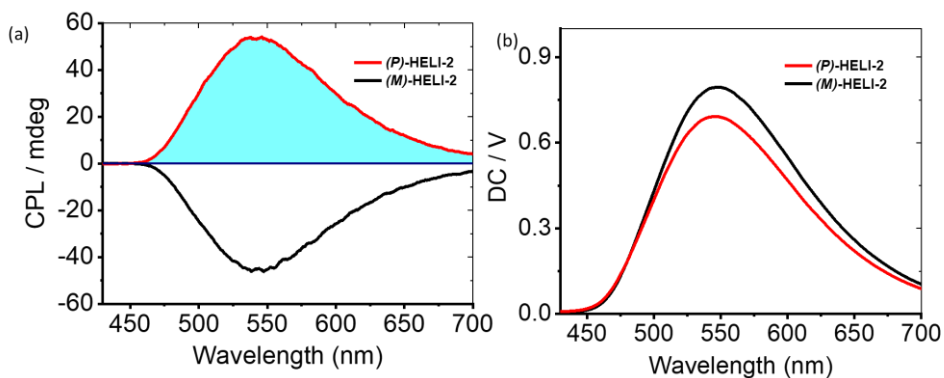

Figure S19. (a) CPL spectra and (b) corresponding DC spectra of (*P*)-HELI-2 and (*M*)-HELI-2 (18  $\mu$ M) in hexane ( $\lambda_{\text{ex}} = 330$  nm).

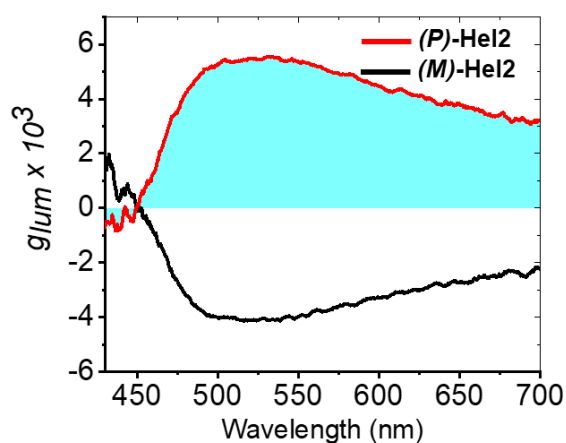

Figure S20. Luminescence dissymmetry factors of (*P*)-HELI-2 and (*M*)-HELI-2 in hexane ( $\lambda_{\text{ex}} = 330$  nm).

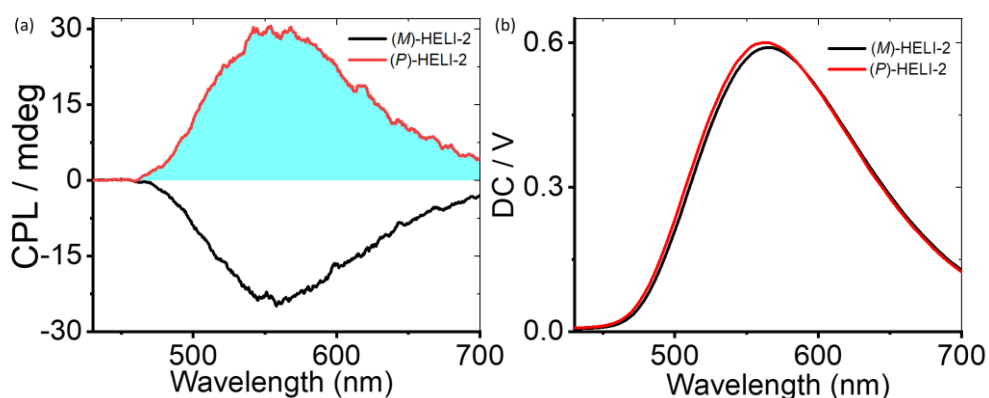

Figure S21. (a) CPL spectra and (b) corresponding DC volt spectra of (*P*)-HELI-2 and (*M*)-HELI-2 (18  $\mu$ M) in DCM ( $\lambda_{\text{ex}} = 330$  nm).

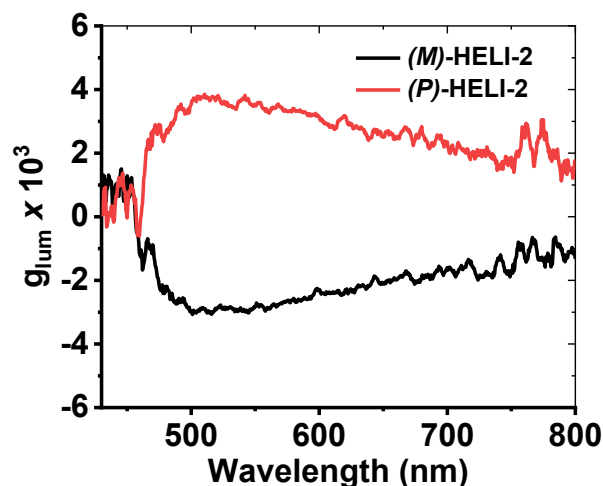

Figure S22. Luminescence dissymmetry factors of (*P*)-HELI-2 and (*M*)-HELI-2 in DCM ( $\lambda_{\text{ex}} = 330$  nm).

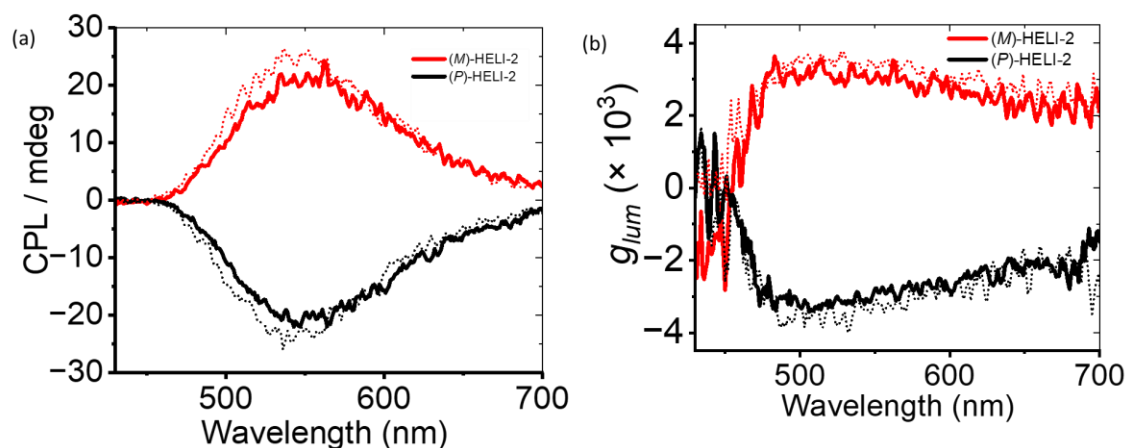

Figure S23. (a) CPL spectra of (*P*)-HELI-2 and (*M*)-HELI-2 (8  $\mu\text{M}$ ) in DCM (solid line) and toluene (dotted line) ( $\lambda_{\text{ex}} = 330$  nm). (b) Luminescence dissymmetry factors of (*P*)-HELI-2 and (*M*)-HELI-2 (8  $\mu\text{M}$ ) in DCM (solid line) and toluene (dotted line) ( $\lambda_{\text{ex}} = 330$  nm).

## S9. Variable Temperature CD and CPL Studies

### S9.1. CD Study in Toluene

Variable temperature CD measurements were performed in JASCO J-815 CD spectrometer equipped with a Peltier MCB-100. For both the enantiomers *P* and *M*, the sample preparation was done in toluene, and the concentration was maintained at 8  $\mu\text{M}$ . After reaching the desired temperature, 6 CD measurements were done with a 10-minute interval.

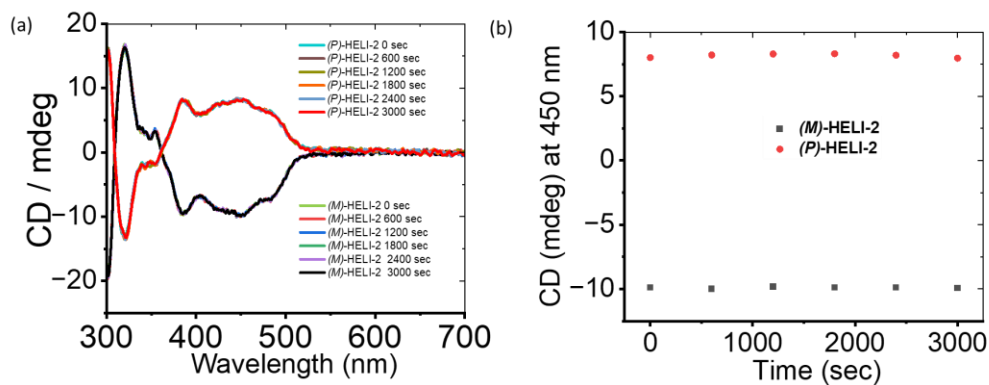

Figure S24. (a) CD spectra of (*P*)/(*M*)-HELI-2 in toluene (8  $\mu$ M) at 25  $^{\circ}$ C. (b) Variation of the CD signal of (*P*)/(*M*)-HELI-2 in toluene at 450 nm with time.

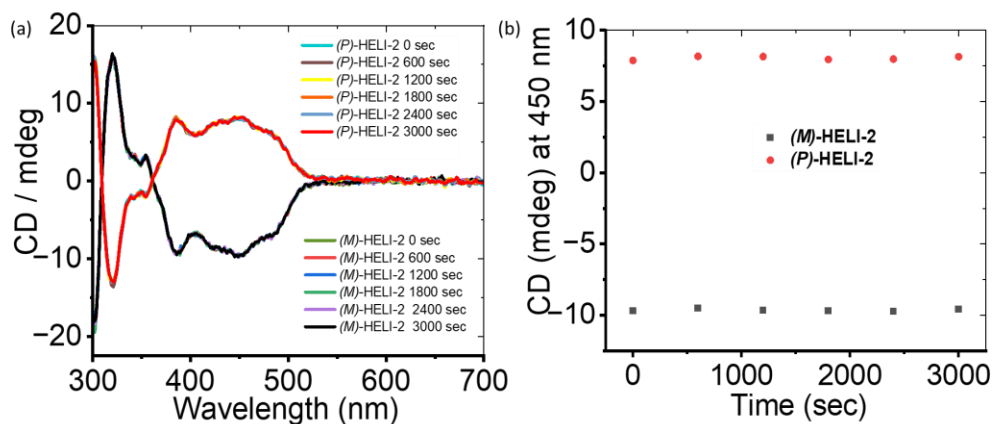

Figure S25. (a) CD spectra of (*P*)/(*M*)-HELI-2 in toluene (8  $\mu$ M) at 35  $^{\circ}$ C. (b) Variation of the CD signal of (*P*)/(*M*)-HELI-2 in toluene at 450 nm with time.

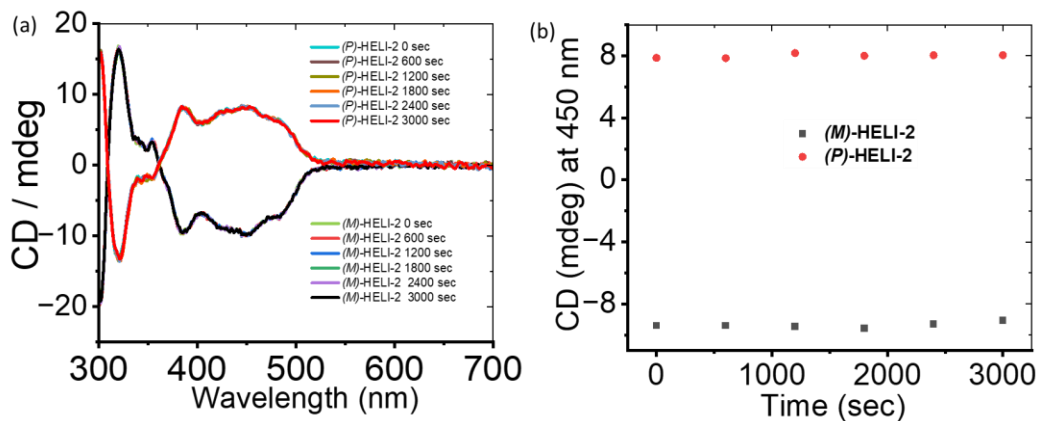

Figure S26. (a) CD spectra of (*P*)/(*M*)-HELI-2 in toluene (8  $\mu$ M) at 45  $^{\circ}$ C. (b) Variation of the CD signal of (*P*)/(*M*)-HELI-2 in toluene at 450 nm with time.

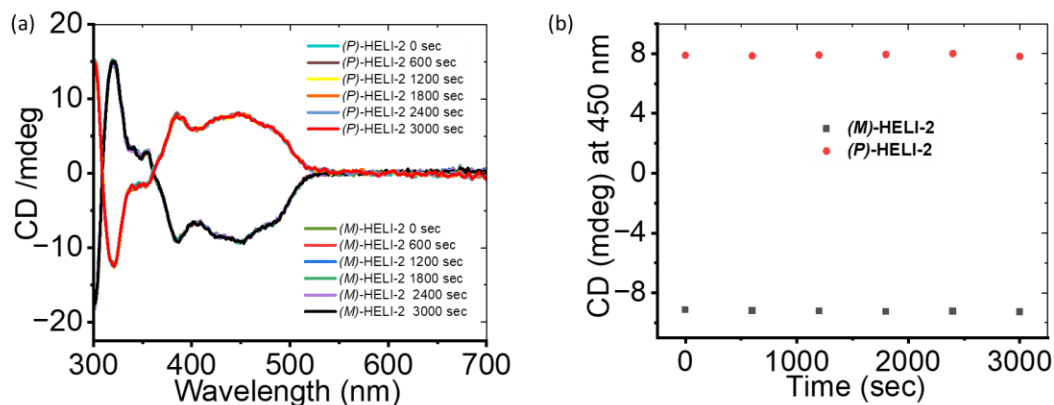

Figure S27. (a) CD spectra of (P)/(M)-HELI-2 in toluene (8 μM) at 55 °C. (b) Variation of the CD signal of (P)/(M)-HELI-2 in toluene at 450 nm with time.

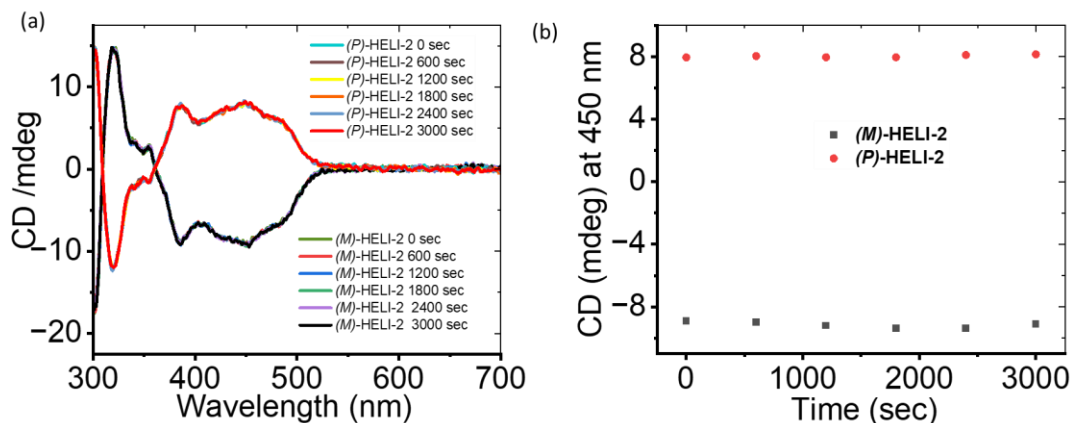

Figure S28. (a) CD spectra of (P)/(M)-HELI-2 in toluene (8 μM) at 65 °C. (b) Variation of the CD signal of (P)/(M)-HELI-2 in toluene at 450 nm with time.

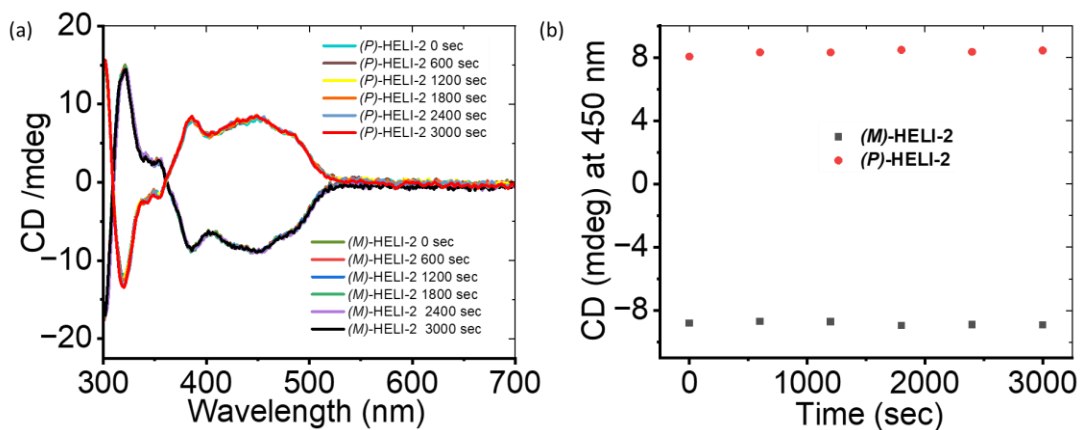

Figure S29. (a) CD spectra of (P)/(M)-HELI-2 in toluene (8 μM) at 75 °C. (b) Variation of the CD signal of (P)/(M)-HELI-2 in toluene at 450 nm with time.

## S9.2. CD Study in *Ortho*-dichlorobenzene

Variable temperature CD measurements were performed in JASCO J-1500 spectrometer with a Peltier CTU-100. For both the enantiomers *P* and *M*, the sample preparation was done in *ortho*-dichlorobenzene, and the concentration was maintained at 8  $\mu\text{M}$ . After reaching the desired temperature, 4 CD measurements were done with a 10-minute interval.

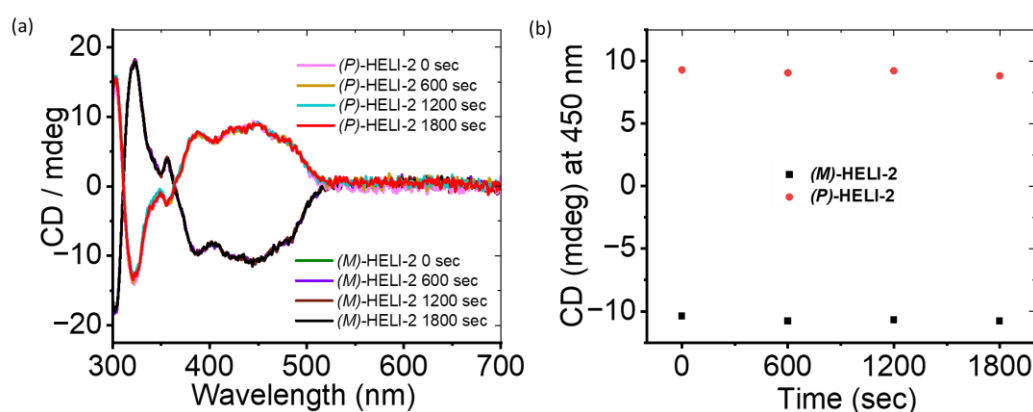

**Figure S30.** (a) CD spectra of (P)/(M)-HELI-2 in *ortho*-dichlorobenzene (8  $\mu\text{M}$ ) at 20  $^{\circ}\text{C}$ . (b) Variation of the CD signal of (P)/(M)-HELI-2 in *ortho*-dichlorobenzene at 450 nm with time.

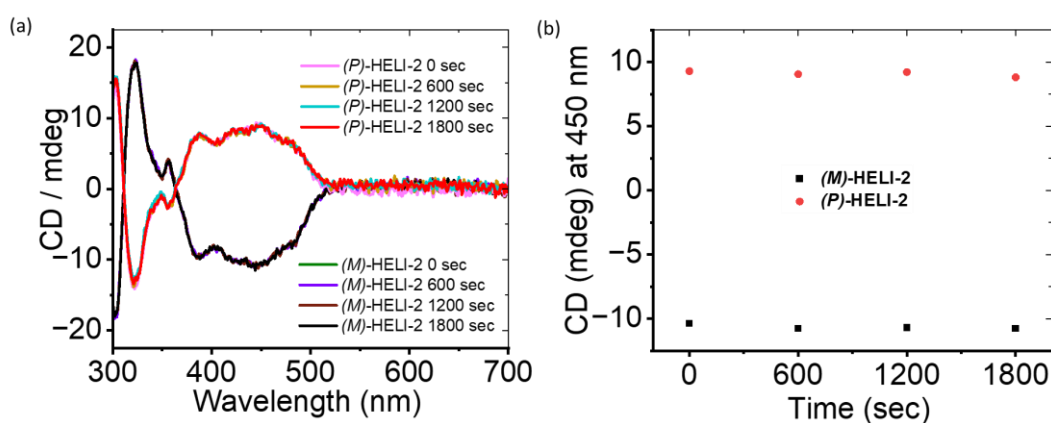

**Figure S31.** (a) CD spectra of (P)/(M)-HELI-2 in *ortho*-dichlorobenzene (8  $\mu\text{M}$ ) at 30  $^{\circ}\text{C}$ . (b) Variation of the CD signal of (P)/(M)-HELI-2 in *ortho*-dichlorobenzene at 450 nm with time.

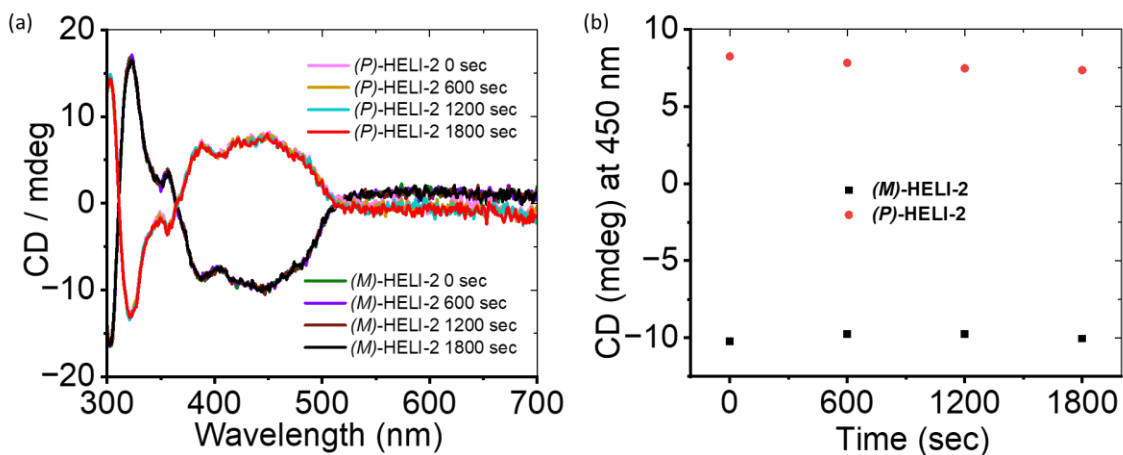

Figure S32. (a) CD spectra of (P)/(M)-HELI-2 in *ortho*-dichlorobenzene (8 μM) at 40 °C. (b) Variation of the CD signal of (P)/(M)-HELI-2 in *ortho*-dichlorobenzene at 450 nm with time.

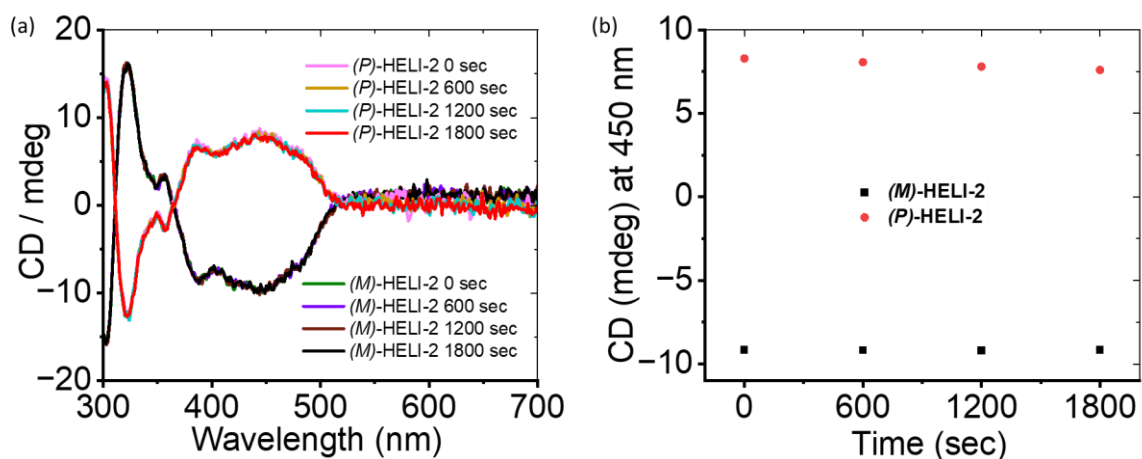

Figure S33. (a) CD spectra of (P)/(M)-HELI-2 in *ortho*-dichlorobenzene (8 μM) at 50 °C. (b) Variation of the CD signal of (P)/(M)-HELI-2 in *ortho*-dichlorobenzene at 450 nm with time.

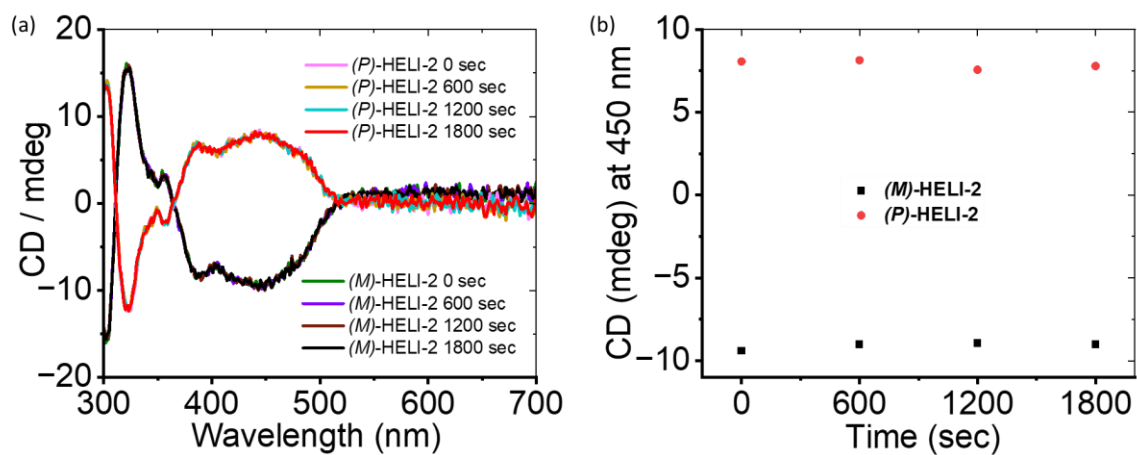

Figure S34. (a) CD spectra of (P)/(M)-HELI-2 in *ortho*-dichlorobenzene (8 μM) at 60 °C. (b) Variation of the CD signal of (P)/(M)-HELI-2 in *ortho*-dichlorobenzene at 450 nm with time.

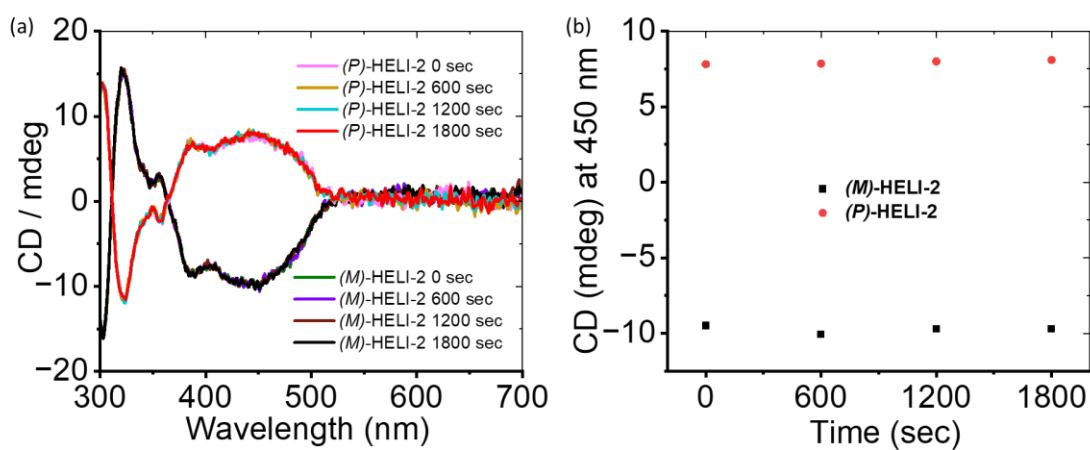

Figure S35. (a) CD spectra of (P)/(M)-HELI-2 in *ortho*-dichlorobenzene (8 μM) at 70 °C. (b) Variation of the CD signal of (P)/(M)-HELI-2 in *ortho*-dichlorobenzene at 450 nm with time.

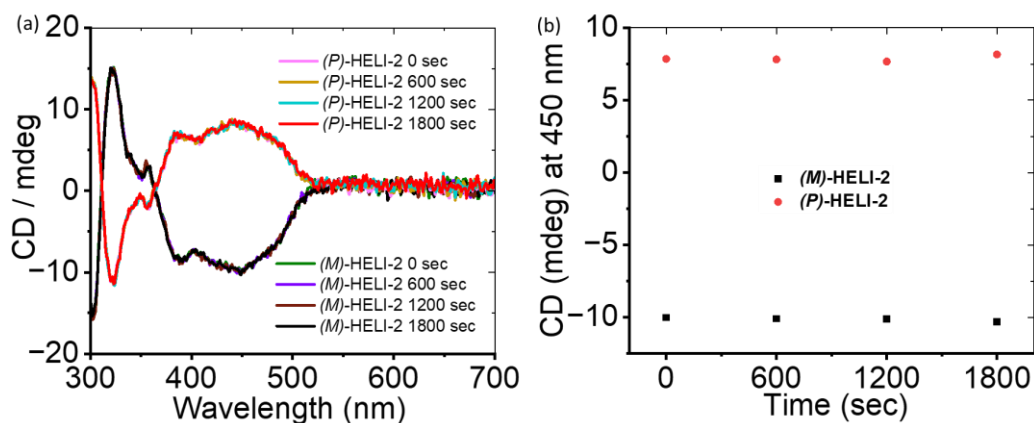

**Figure S36.** (a) CD spectra of (*P*)/(*M*)-HELI-2 in *ortho*-dichlorobenzene (8  $\mu$ M) at 80 °C. (b) Variation of the CD signal of (*P*)/(*M*)-HELI-2 in *ortho*-dichlorobenzene at 450 nm with time.

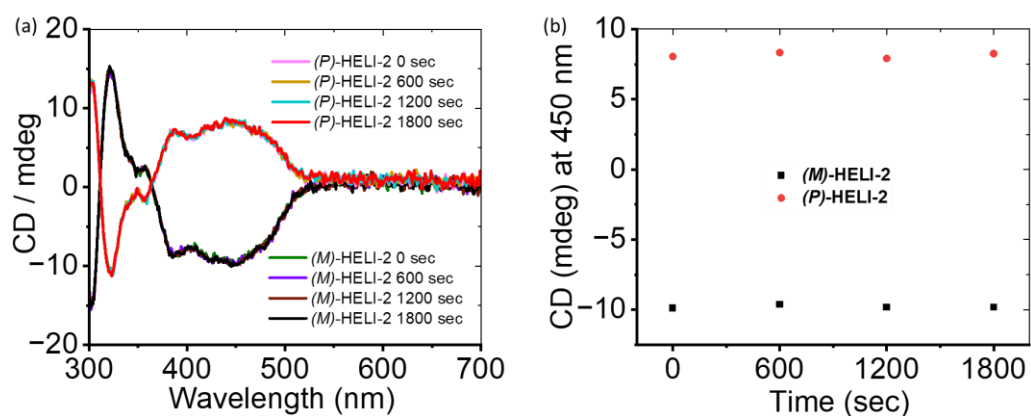

**Figure S37.** (a) CD spectra of (*P*)/(*M*)-HELI-2 in *ortho*-dichlorobenzene (8  $\mu$ M) at 90 °C. (b) Variation of the CD signal of (*P*)/(*M*)-HELI-2 in *ortho*-dichlorobenzene at 450 nm with time.

### S9.3. CPL Study in Toluene

For variable temperature CPL measurements, the JASCO CPL-300 equipped with PTC-510 Peltier has been used. For both the enantiomers *P* and *M*, the sample preparation was done in toluene, and the concentration was maintained at 8  $\mu$ M. Measurement was started at 25 °C and carried out up to 75 °C with a 10 °C increment. After reaching the desired temperature, 6 CPL measurements were taken at 10-minute intervals.

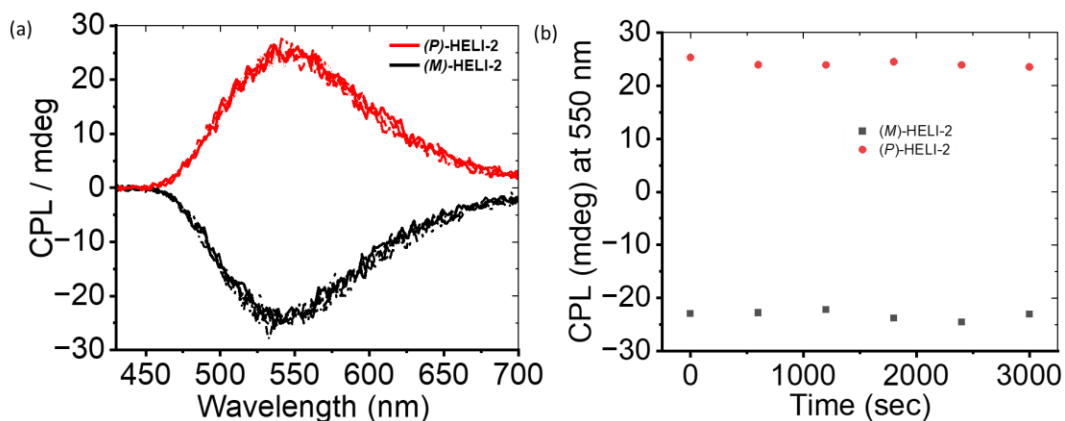

**Figure S38.** (a) CPL spectra of (*P*)/(*M*)-HELI-2 in toluene (8  $\mu$ M) at 25  $^{\circ}$ C at time 0 sec (solid red and black lines), and at time 600 sec to 3000 sec (all dotted red and black lines). (b) Variation of the CPL signal of (*P*)/(*M*)-HELI-2 in toluene at 550 nm with time ( $\lambda_{\text{ex}} = 330$  nm).

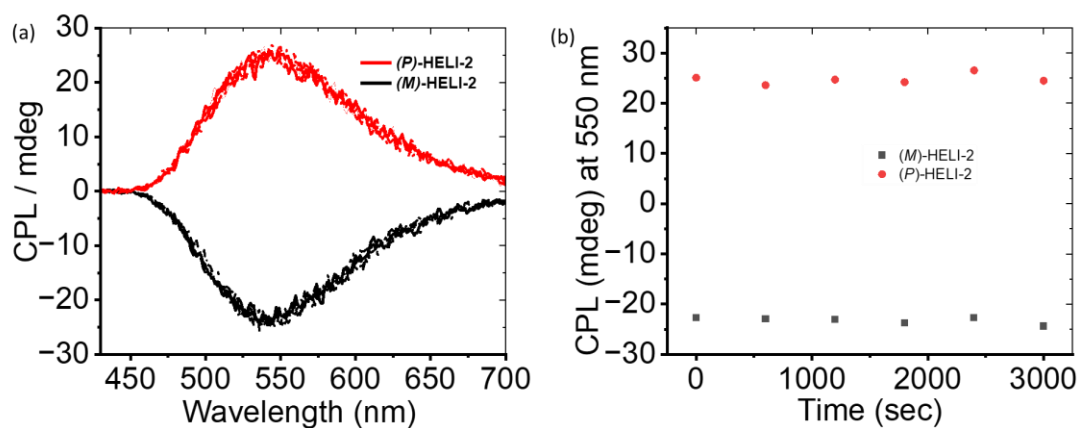

**Figure S39.** (a) CPL spectra of (*P*)/(*M*)-HELI-2 in toluene (8  $\mu$ M) at 35  $^{\circ}$ C at time 0 sec (solid red and black lines), and at time 600 sec to 3000 sec (all dotted red and black lines). (b) Variation of the CPL signal of (*P*)/(*M*)-HELI-2 in toluene at 550 nm with time ( $\lambda_{\text{ex}} = 330$  nm).

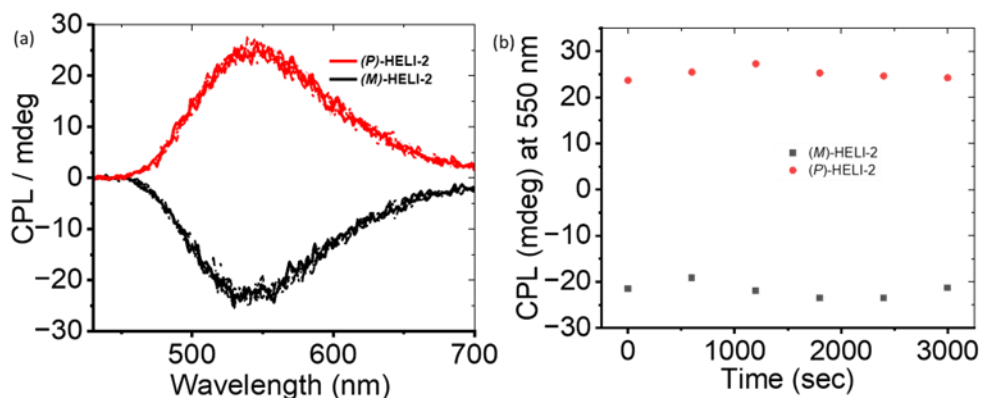

**Figure S40.** (a) CPL spectra of (*P*)/(*M*)-HELI-2 in toluene (8  $\mu$ M) at 45  $^{\circ}$ C at time 0 sec (solid red and black lines), and at time 600 sec to 3000 sec (all dotted red and black lines). (b) Variation of the CPL signal of (*P*)/(*M*)-HELI-2 in toluene at 550 nm with time ( $\lambda_{\text{ex}} = 330$  nm).

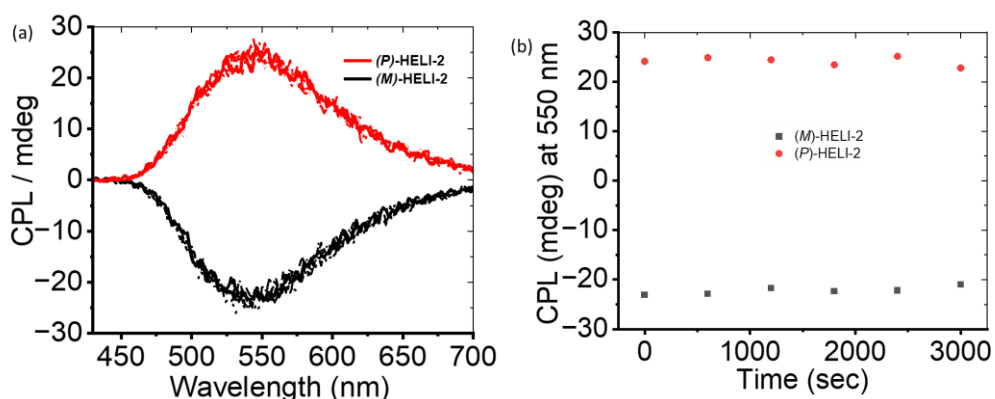

**Figure S41.** (a) CPL spectra of (*P*)/(*M*)-HELI-2 in toluene (8  $\mu$ M) at 55  $^{\circ}$ C at time 0 sec (solid red and black lines), and at time 600 sec to 3000 sec (all dotted red and black lines). (b) Variation of the CPL signal of (*P*)/(*M*)-HELI-2 in toluene at 550 nm with time ( $\lambda_{\text{ex}} = 330$  nm).

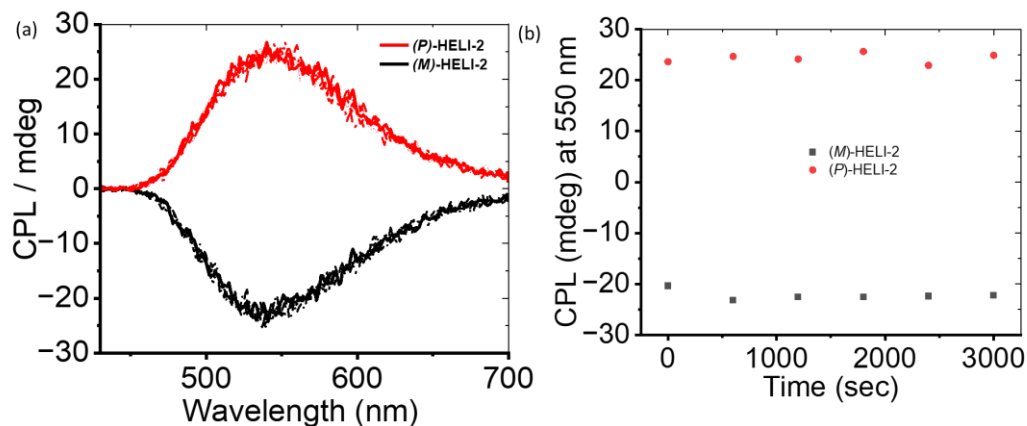

**Figure S42.** (a) CPL spectra of (*P*)/(*M*)-HELI-2 in toluene (8  $\mu$ M) at 65  $^{\circ}$ C at time 0 sec (solid red and black lines), and at time 600 sec to 3000 sec (all dotted red and black lines). (b) Variation of the CPL signal of (*P*)/(*M*)-HELI-2 in toluene at 550 nm with time ( $\lambda_{\text{ex}}$  = 330 nm).

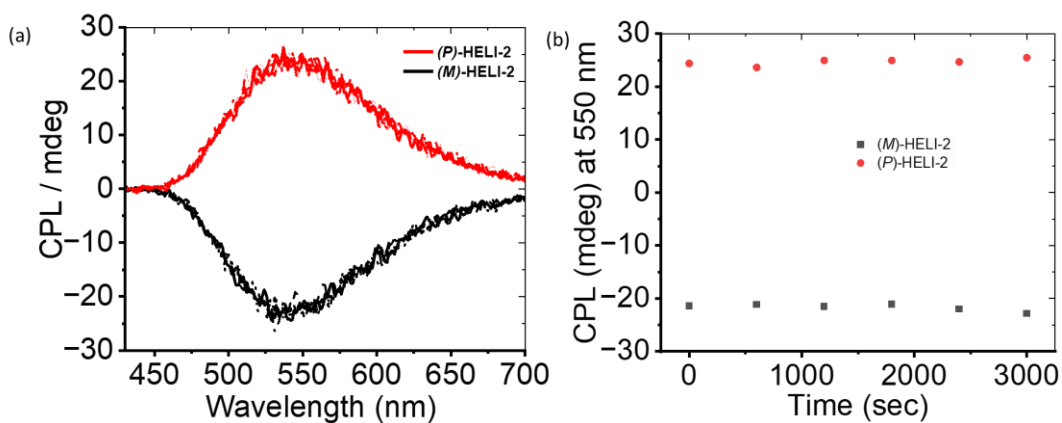

**Figure S43.** (a) CPL spectra of (*P*)/(*M*)-HELI-2 in toluene (8  $\mu$ M) at 75  $^{\circ}$ C at time 0 sec (solid red and black lines), and at time 600 sec to 3000 sec (all dotted red and black lines). (b) Variation of the CPL signal of (*P*)/(*M*)-HELI-2 in toluene at 550 nm with time ( $\lambda_{\text{ex}}$  = 330 nm).

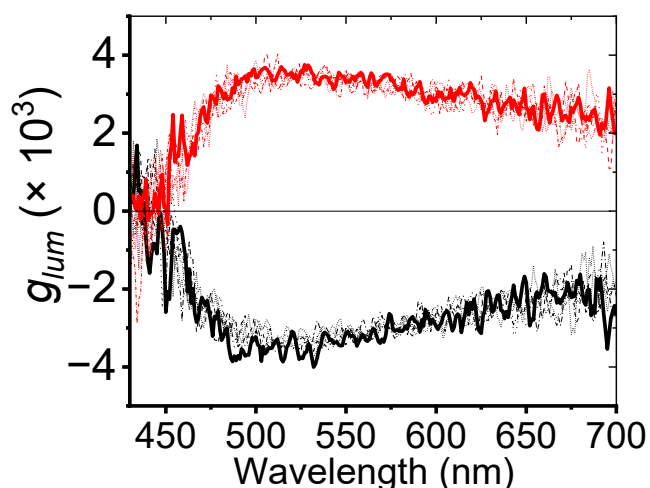

Figure S44.  $g_{lum}$  of (*P*)/(*M*)-HELI-2 in toluene at 25 °C (solid red and black lines), and at 35 °C to 75 °C (all dotted red and black lines) ( $\lambda_{ex} = 330$  nm).

#### S9.4. CPL Study in *Ortho*-dichlorobenzene

For variable temperature CPL measurements, the JASCO CPL-300 equipped with PTC-510 Peltier has been used. For both the enantiomers *P* and *M*, the sample preparation was done in *ortho*-dichlorobenzene, and the concentration was maintained at 8  $\mu$ M. Measurement was started at 20 °C and carried out up to 90 °C with a 10 °C increment. After reaching the desired temperature, 4 CPL measurements were taken at 10-minute intervals.

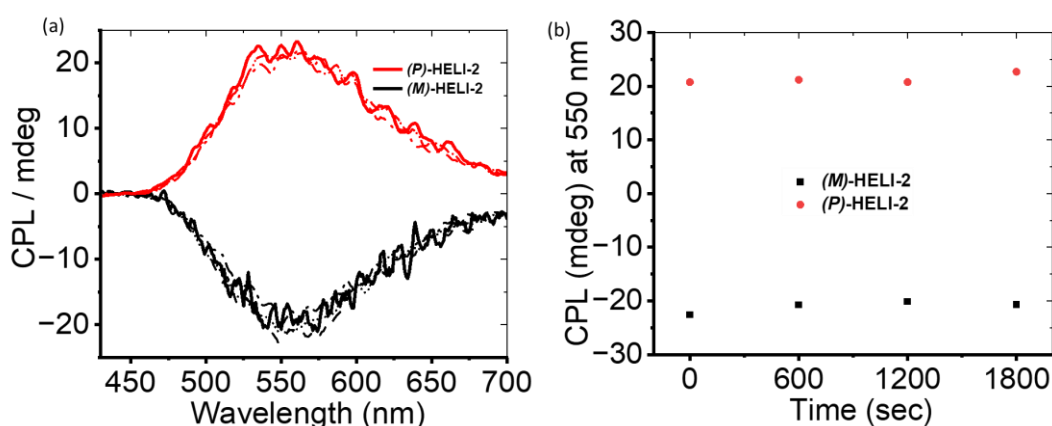

Figure S45. (a) CPL spectra of (*P*)/(*M*)-HELI-2 in *ortho*-dichlorobenzene (8  $\mu$ M) at 20 °C at time 0 sec (solid red and black lines), and at time 600 sec to 1800 sec (all dotted red and black lines). (b) Variation of the CPL signal of (*P*)/(*M*)-HELI-2 in *ortho*-dichlorobenzene at 550 nm with time ( $\lambda_{ex} = 330$  nm).

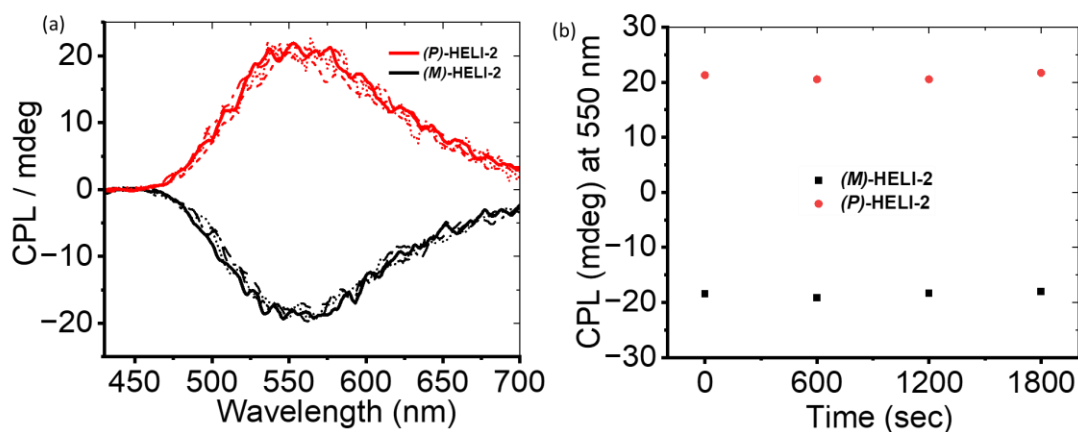

**Figure S46.** (a) CPL spectra of (*P*)/(*M*)-HELI-2 in *ortho*-dichlorobenzene (8  $\mu$ M) at 30  $^{\circ}$ C at time 0 sec (solid red and black lines), and at time 600 sec to 1800 sec (all dotted red and black lines). (b) Variation of the CPL signal of (*P*)/(*M*)-HELI-2 in *ortho*-dichlorobenzene at 550 nm with time ( $\lambda_{\text{ex}} = 330$  nm).

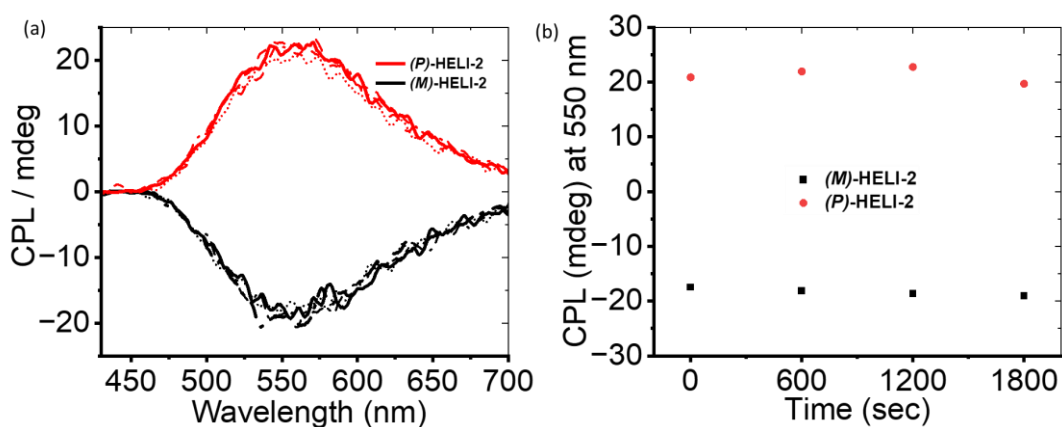

**Figure S47.** (a) CPL spectra of (*P*)/(*M*)-HELI-2 in *ortho*-dichlorobenzene (8  $\mu$ M) at 40  $^{\circ}$ C at time 0 sec (solid red and black lines), and at time 600 sec to 1800 sec (all dotted red and black lines). (b) Variation of the CPL signal of (*P*)/(*M*)-HELI-2 in *ortho*-dichlorobenzene at 550 nm with time ( $\lambda_{\text{ex}} = 330$  nm).

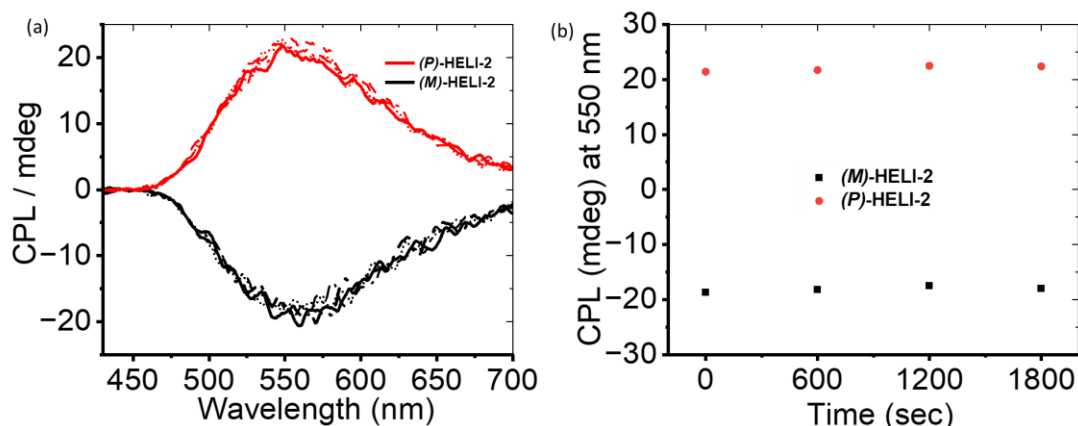

**Figure S48.** (a) CPL spectra of (*P*)/(*M*)-HELI-2 in *ortho*-dichlorobenzene (8  $\mu$ M) at 50  $^{\circ}$ C at time 0 sec (solid red and black lines), and at time 600 sec to 1800 sec (all dotted red and black lines). (b) Variation of the CPL signal of (*P*)/(*M*)-HELI-2 in *ortho*-dichlorobenzene at 550 nm with time ( $\lambda_{\text{ex}} = 330$  nm).

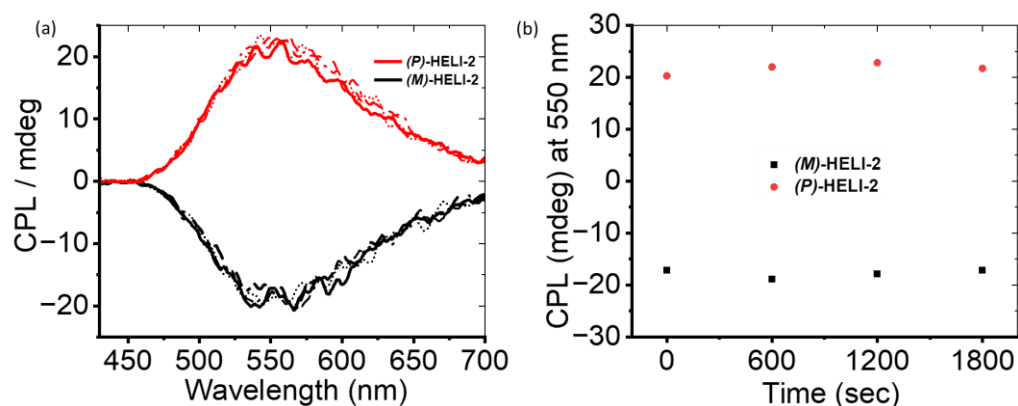

**Figure S49.** (a) CPL spectra of (*P*)/(*M*)-HELI-2 in *ortho*-dichlorobenzene (8  $\mu$ M) at 60  $^{\circ}$ C at time 0 sec (solid red and black lines), and at time 600 sec to 1800 sec (all dotted red and black lines). (b) Variation of the CPL signal of (*P*)/(*M*)-HELI-2 in *ortho*-dichlorobenzene at 550 nm with time ( $\lambda_{\text{ex}} = 330$  nm).

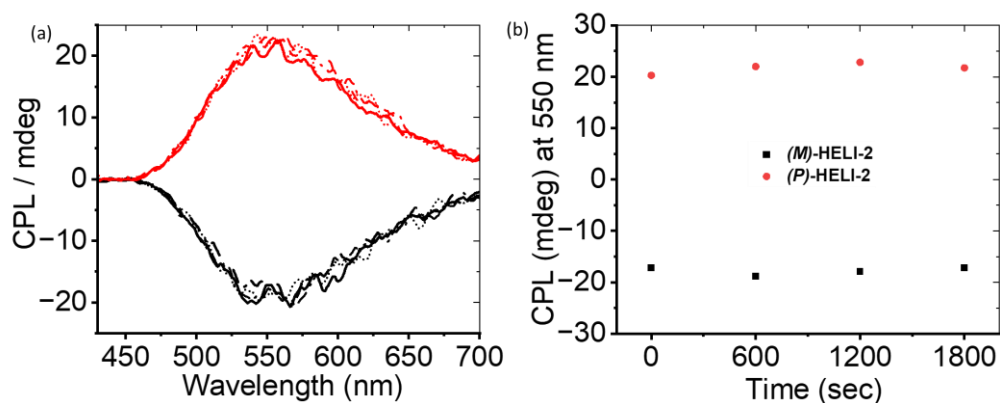

**Figure S50.** (a) CPL spectra of (*P*)/(*M*)-HELI-2 in *ortho*-dichlorobenzene (8  $\mu$ M) at 70  $^{\circ}$ C at time 0 sec (solid red and black lines), and at time 600 sec to 1800 sec (all dotted red and black lines). (b) Variation of the CPL signal of (*P*)/(*M*)-HELI-2 in *ortho*-dichlorobenzene at 550 nm with time ( $\lambda_{\text{ex}} = 330$  nm).

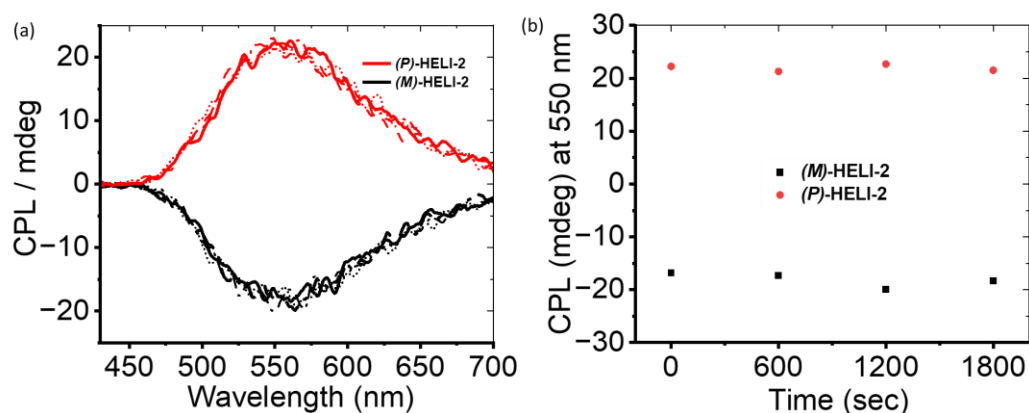

**Figure S51.** (a) CPL spectra of (*P*)/(*M*)-HELI-2 in *ortho*-dichlorobenzene (8  $\mu$ M) at 80  $^{\circ}$ C at time 0 sec (solid red and black lines), and at time 600 sec to 1800 sec (all dotted red and black lines). (b) Variation of the CPL signal of (*P*)/(*M*)-HELI-2 in *ortho*-dichlorobenzene at 550 nm with time ( $\lambda_{\text{ex}} = 330$  nm).

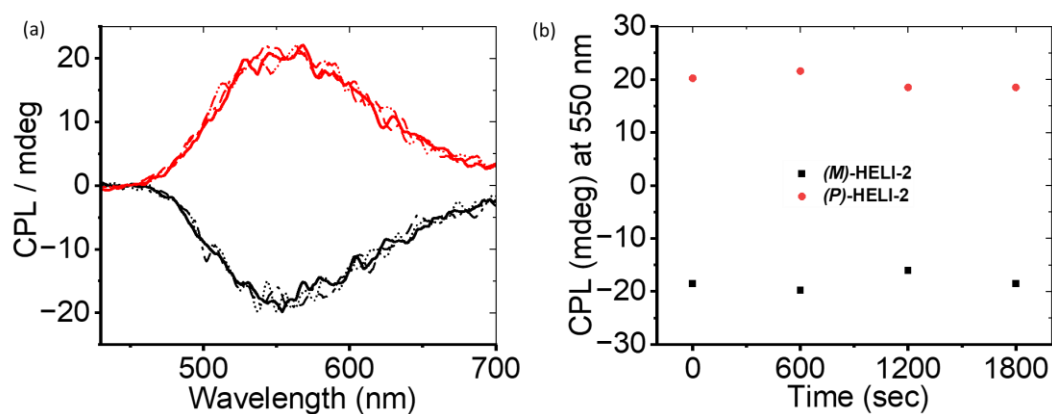

**Figure S52.** (a) CPL spectra of (*P*)/(*M*)-HELI-2 in *ortho*-dichlorobenzene (8  $\mu$ M) at 90  $^{\circ}$ C at time 0 sec (solid red and black lines), and at time 600 sec to 1800 sec (all dotted red and black lines). (b) Variation of the CPL signal of (*P*)/(*M*)-HELI-2 in *ortho*-dichlorobenzene at 550 nm with time ( $\lambda_{\text{ex}} = 330$  nm).

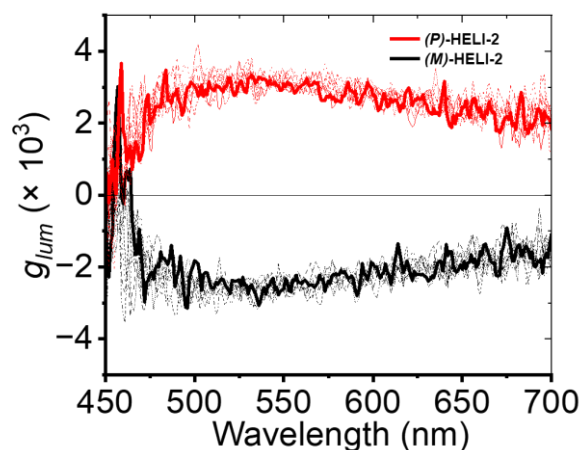

**Figure S53.**  $g_{lum}$  of (P)/(M)-HELI-2 in *ortho*-dichlorobenzene at 20 °C (solid red and black lines), and at 30 °C to 90 °C (all dotted red and black lines) ( $\lambda_{ex} = 330$  nm).

### S9.5. Thermal Stability Study of (M)-HELI-2 at 160 °C

For the thermal stability study, the enantiopure sample was dissolved in *ortho*-dichlorobenzene and heated at 160 °C in an oil bath. At 2 h intervals, the heating was paused, and the solution was allowed to cool to room temperature to record the CD spectrum. After measurement, the sample was reheated to 160 °C to continue the experiment. This procedure was repeated until a total heating duration of 12 h was reached.

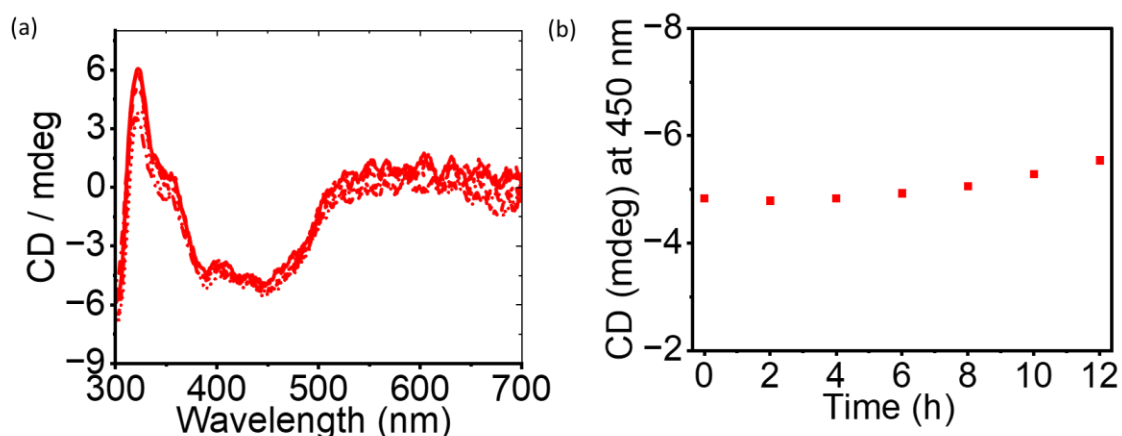

**Figure S54.** (a) CD spectra of (M)-HELI-2 in *ortho*-dichlorobenzene (4  $\mu$ M) at 160 °C. (b) Variation of the CD signal of (M)-HELI-2 in *ortho*-dichlorobenzene at 450 nm with time.

## S10. Acid-Base Responsive Reversible Behaviour in the Solution State

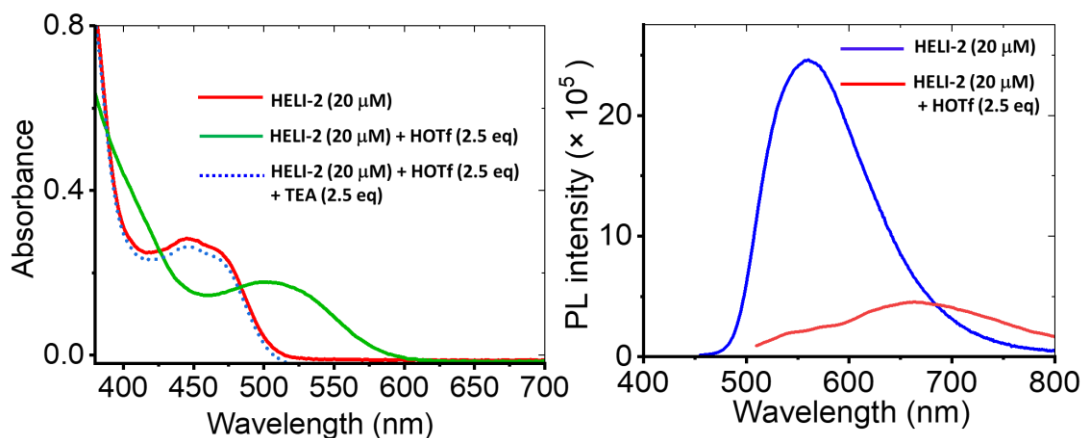

Figure S55. Absorption (left) and emission (right) spectra of HELI-2 in DCM (20  $\mu\text{M}$ ) upon addition of 2.5 equiv. of triflic acid (HOTf), followed by 2.5 equiv. of triethylamine ( $\text{Et}_3\text{N}$ ).

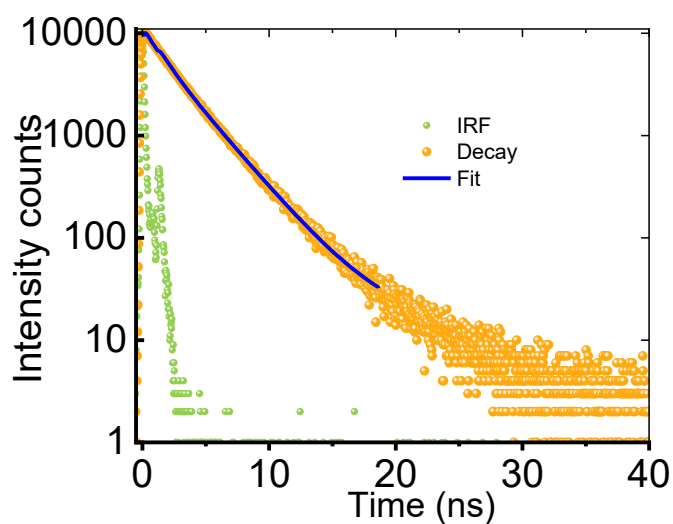

Figure S56. Fluorescence lifetime of protonated HELI-2 (15  $\mu\text{M}$ ) in dichloromethane.

Table S5. Photophysical properties of protonated HELI-2 in DCM

| $\lambda_{max}^{abs}$ (nm) | $\lambda_{max}^{em}$ (nm) | $\Phi$ (%) | $\tau$ (ns) |
|----------------------------|---------------------------|------------|-------------|
| 550                        | 660                       | 2          | 2.34        |

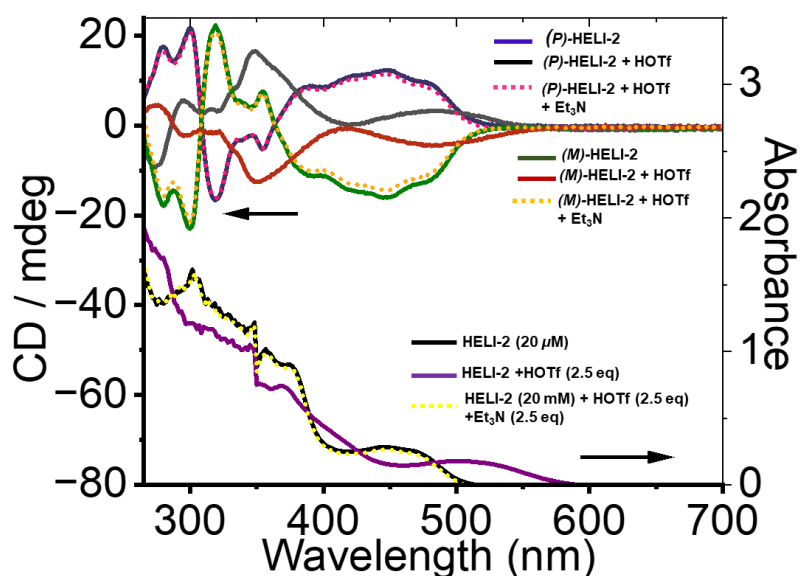

**Figure S57.** Absorption (bottom; with right-hand-side Y-axis) and CD (top; with left-hand-side Y-axis) spectra of (*P/M*)-HELI-2 in DCM (8  $\mu$ M) upon addition of 2.5 equiv. (for absorption) or 50 equiv. (for CD) of triflic acid (HOTf), followed by 2.5 equiv. (for absorption) or 50 equiv. (for CD) of triethylamine (Et<sub>3</sub>N).

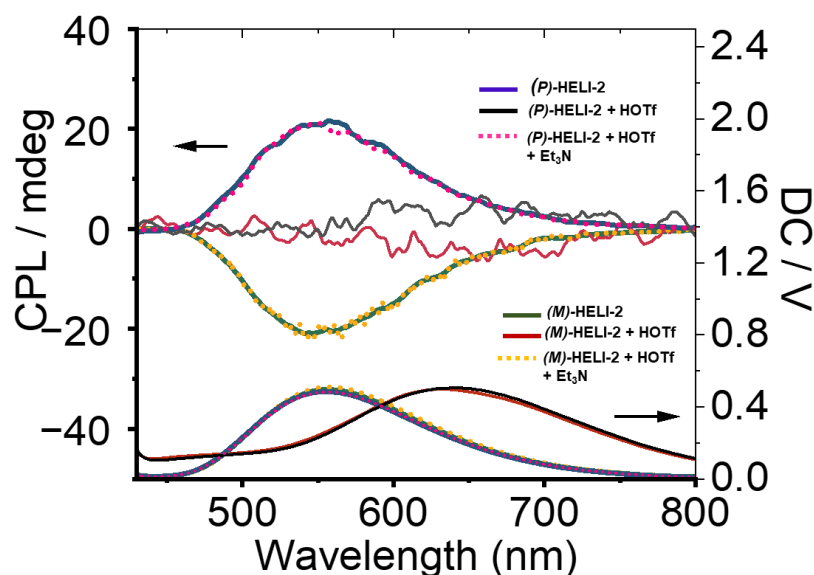

**Figure S58.** CPL (top; with left-hand-side Y-axis) and corresponding DC volt (bottom; with right-hand-side Y-axis) spectra of (*P/M*)-HELI-2 in DCM (8  $\mu$ M) upon addition of 50 equiv. of triflic acid (HOTf), followed by 50 equiv. of triethylamine (Et<sub>3</sub>N) ( $\lambda_{\text{ex}} = 330$  nm).

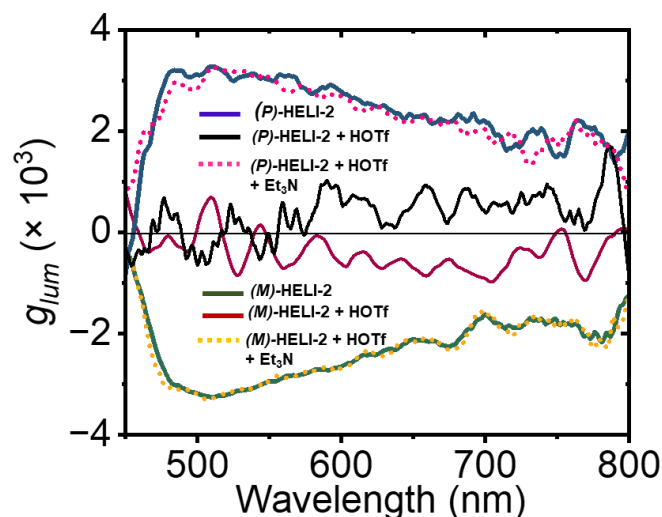

**Figure S59.** Luminescence dissymmetry factors of (*P/M*)-HELI-2 in DCM upon addition of 50 equiv. of triflic acid (HOTf), followed by 50 equiv. of triethylamine (Et<sub>3</sub>N) ( $\lambda_{\text{ex}} = 330$  nm).

### S11. Monitoring Stepwise Protonation Process by <sup>1</sup>H NMR Spectroscopy

A controlled stepwise protonation process was monitored by NMR titration experiment with HELI-2 by addition of triflic acid in CDCl<sub>3</sub>. As typically imidazole ring nitrogen is used to be more basic (pK<sub>a</sub> of the conjugate acid ~7.0) compared to pyridine ring nitrogen (pK<sub>a</sub> of the conjugate acid ~5.2), it is expected that the imidazole rings will be protonated first upon addition of triflic acid. It was observed that the H<sub>a</sub>, H<sub>e</sub>, and H<sub>g</sub> protons were affected significantly upon acid addition (**Fig. S60**). In case of the H<sub>e</sub> protons, the peak is shifted downfield to 8.29 ppm from 8.20 ppm and finally to 8.38 ppm at the saturation point. Similarly, the H<sub>g</sub> proton is also shifted downfield to 8.60 ppm from 8.46 ppm and finally to 8.82 ppm, reaching a saturation point. These downfield shifts should be due to the protonation of the imidazole rings as well as the pyridine ring, making the fused pyrene and pyridine rings electron-deficient, and the effect was dominant on the H<sub>e</sub> and H<sub>g</sub> protons. However, the pyrene ring protons H<sub>a</sub> showed an upfield shift from 9.03 ppm to 8.79 ppm and finally shifted to 8.65 ppm. This upfield shift might be due the interaction of the H<sub>a</sub> protons with the OTf<sup>-</sup> counter-anions which are introduced after the imidazole-ring protonation with HOTf and might be placed near to these protons. Finally, it was also observed that the singlet peak due to the H<sub>f</sub> protons of the pyrene rings experienced a negligible change (shifted downfield from 7.42 ppm to 7.44 ppm).

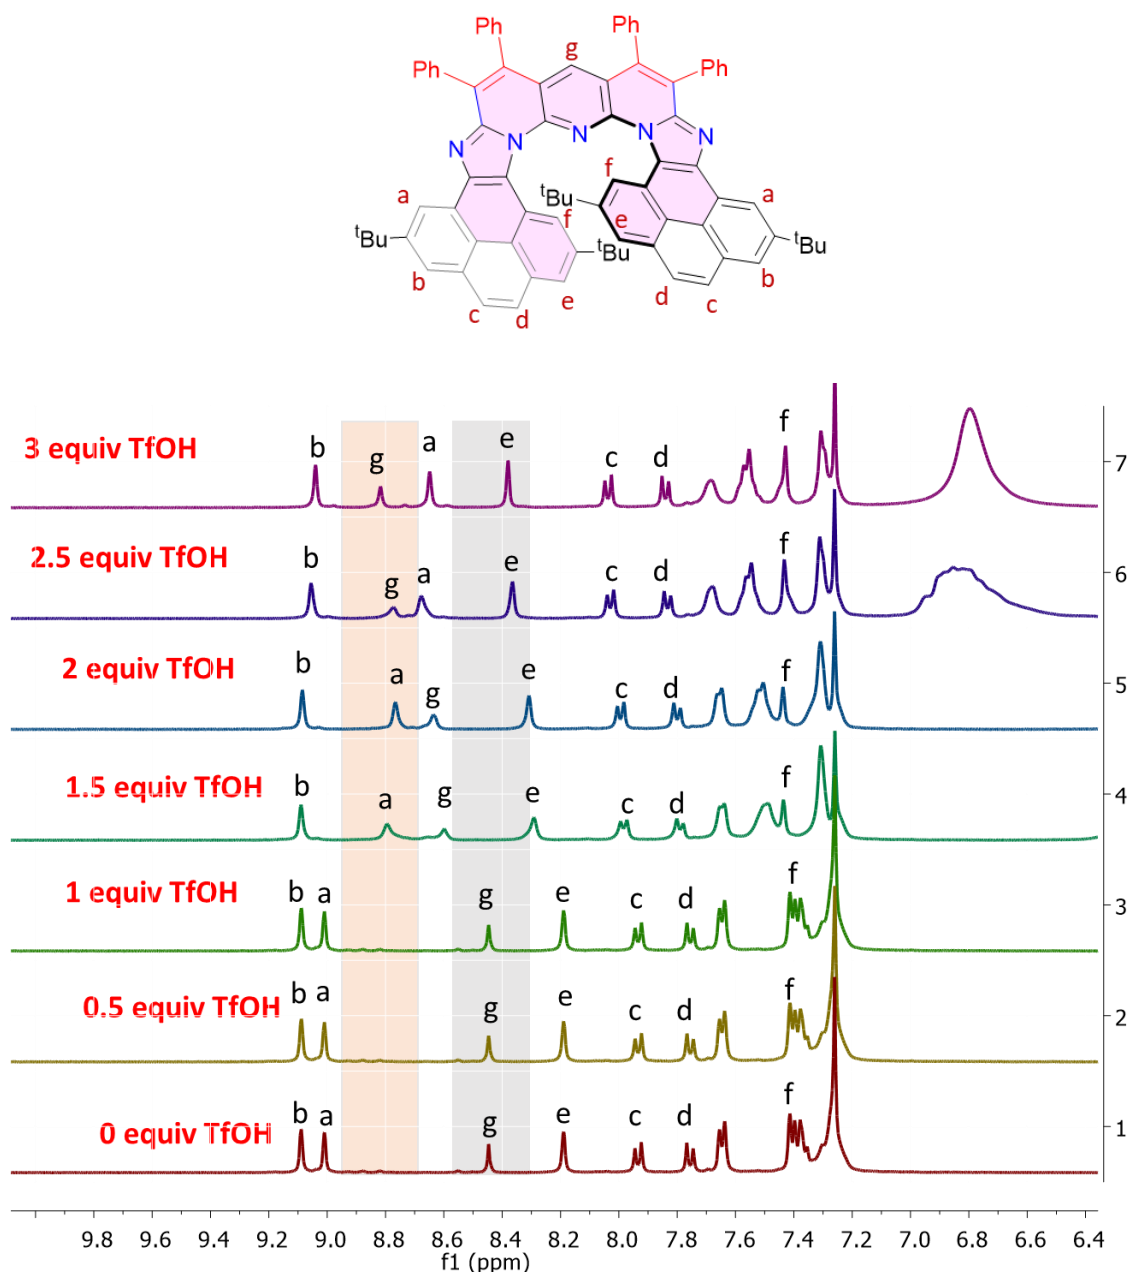

**Figure S60.**  $^1\text{H}$  NMR spectra of HELI-2 (10 mM) in  $\text{CDCl}_3$  (500 MHz, 298 K) upon stepwise addition of triflic acid (HOTf).

## S12. Acid-Base Responsive Reversible Behaviour in the Solid State

For studying the acid-base responsive behaviour in the solid state, thin films of the compounds were made on a quartz slide. At first, enantiomerically pure (*P*) and (*M*) HELI-2 were dissolved in 50  $\mu\text{L}$  of hexane. Then the solution (6  $\mu\text{M}$ ) was dropcast on the quartz slides and left to slow evaporation for 1 hour. CPL was recorded with the dropcast thin

films. After that, the dropcast films were left in triflic acid (HOTf) vapour chamber for 1 hour; a distinct colour change was observed from yellow to reddish orange, and the CPL activity was checked. After that, to regain the CPL activity, the protonated thin film was placed in a triethylamine ( $\text{NEt}_3$ ) vapour chamber, and within 15 minutes, it retained its original yellow color, and the CPL activity was also restored.

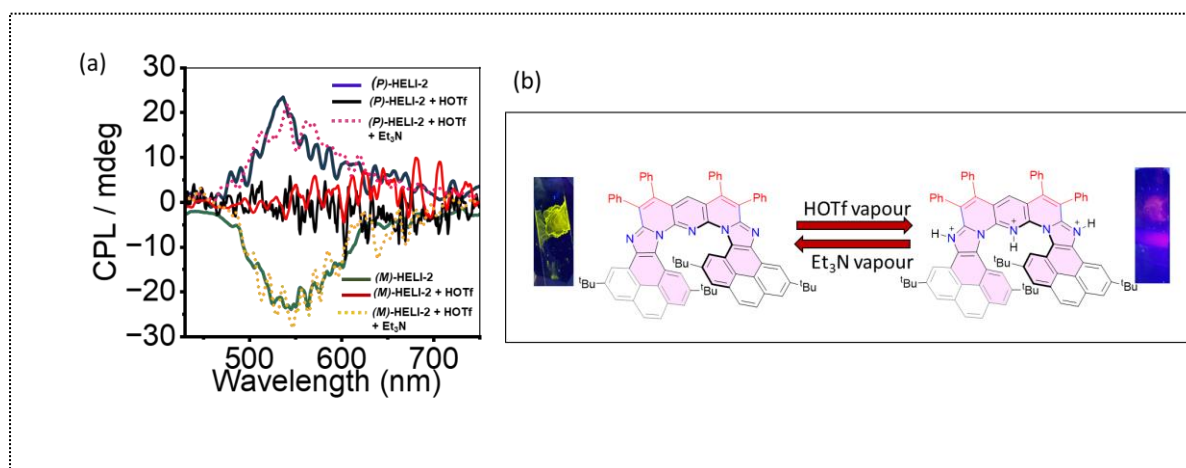

**Figure S61.** (a) CPL spectra of (*P/M*)-HELI-2 thin film upon exposure to triflic acid (HOTf), vapour and triethylamine ( $\text{Et}_3\text{N}$ ) vapour ( $\lambda_{\text{ex}} = 330 \text{ nm}$ ). (b) Colour change of drop-cast thin film upon exposure to triflic acid and triethylamine vapours.

### S13. Calculated HOMO and LUMO for HELI-2 and Protonated HELI-2

Gaussian 09 software was used to carry out all the computational studies.<sup>[S4]</sup> For FMO calculations, the geometry optimizations were performed at the 6-31G (d,p) level of theory in DCM using the CPCM model at 298.15 K and 1 atm. Frequency calculations were carried out to check the true minima of the optimized structures. For ground-state optimized geometries, it showed zero imaginary frequency. The effect of the counter anion was not considered during geometry optimizations of protonated helicene. Later, images of HOMO and LUMO were obtained from optimized geometry to check electronic distributions and the energy gap in between. Time-dependent (TD)-DFT calculations were carried out on the optimized structure using B3LYP/6-31g(d,p) as a basis set, and DCM was used as a solvent for calculations (CPCM model). The excited state energies along with the corresponding oscillator strengths ( $f$ ) are listed in Tables S6a-3b. The UV/Vis spectra (Figure 52) were simulated using the GaussView6 visualization software package.

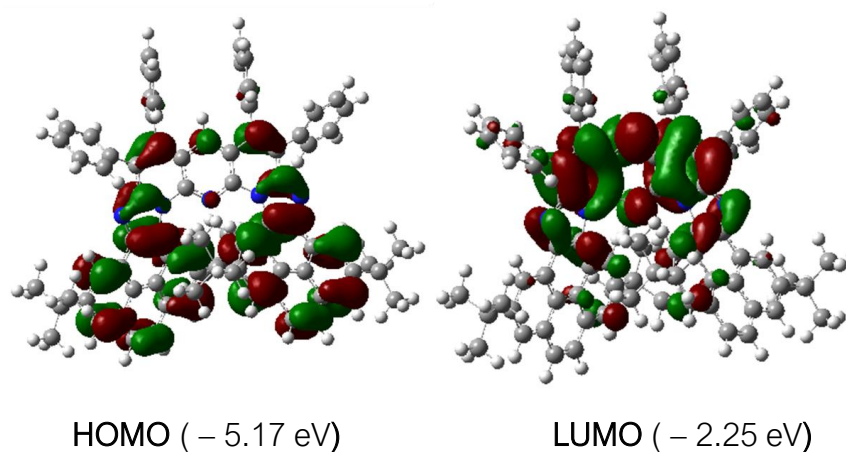

Figure S62a. Kohn-Sham frontier orbital representation and MO energies of HELI-2.

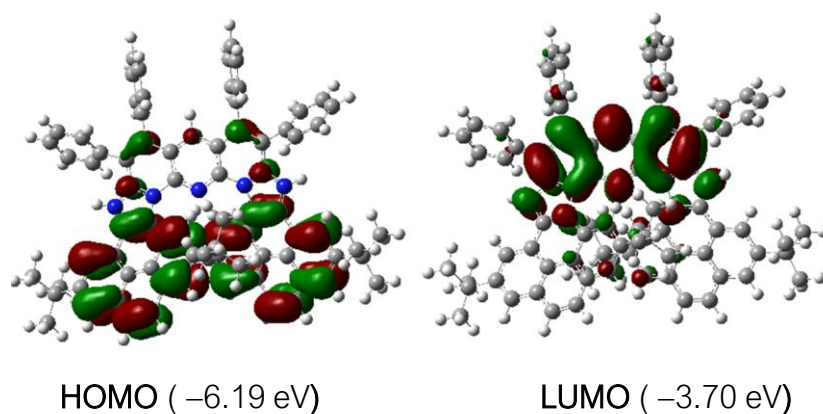

Figure S62b. Kohn-Sham frontier orbital representation and MO energies of protonated HELI-2.

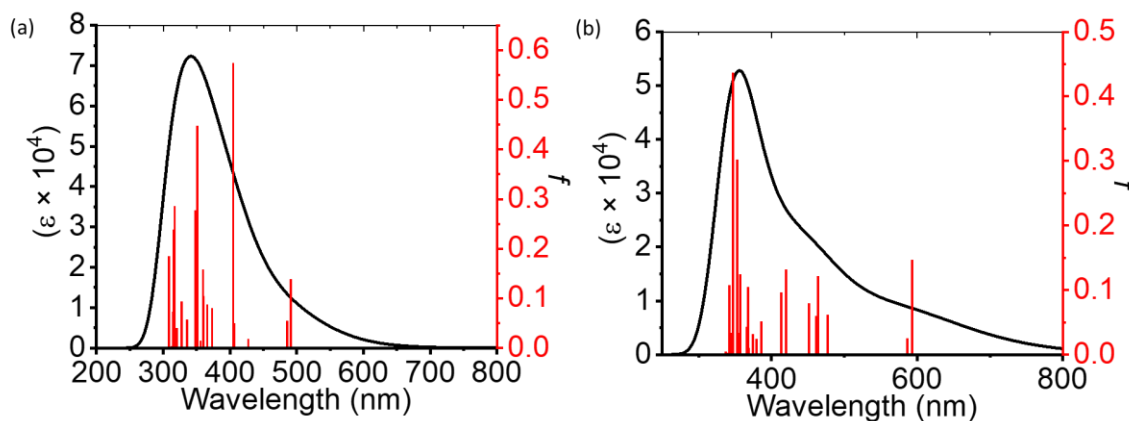

Figure S63. TD-DFT-calculated UV/Vis absorption spectra of (a) HELI-2 and (b) protonated HELI-2 calculated at B3LYP/6-31g(d,p), CPCM-CH<sub>2</sub>Cl<sub>2</sub> level of theory.

**Table S6a:** TD-DFT-calculated UV/Vis absorption data for **HELI-2** at the B3LYP/6-31g(d,p) (solvent CPCM-CH<sub>2</sub>Cl<sub>2</sub>) level of theory.

| Calcd. $\lambda$ [nm] | $f$    | Composition                 | Coefficient | Contribution (%) |
|-----------------------|--------|-----------------------------|-------------|------------------|
| 491.22                | 0.1384 | HOMO $\rightarrow$ LUMO     | 0.70091     | 98.25            |
| 485.52                | 0.0553 | HOMO-1 $\rightarrow$ LUMO   | 0.70081     | 98.22            |
| 427.28                | 0.0189 | HOMO-2 $\rightarrow$ LUMO   | 0.32215     | 20.75            |
|                       |        | HOMO $\rightarrow$ LUMO+1   | 0.61652     | 76.01            |
| 406.38                | 0.0496 | HOMO-3 $\rightarrow$ LUMO   | 0.14410     | 4.15             |
|                       |        | HOMO-1 $\rightarrow$ LUMO+1 | 0.67909     | 92.23            |
| 404.65                | 0.5746 | HOMO-2 $\rightarrow$ LUMO   | 0.60621     | 73.49            |
|                       |        | HOMO $\rightarrow$ LUMO+1   | 0.31560     | 19.92            |
|                       |        | HOMO $\rightarrow$ LUMO+2   | -0.14007    | 3.92             |
| 373.16                | 0.0809 | HOMO-3 $\rightarrow$ LUMO   | 0.63400     | 80.39            |
|                       |        | HOMO-1 $\rightarrow$ LUMO+1 | -0.14342    | 4.11             |
|                       |        | HOMO $\rightarrow$ LUMO+3   | -0.21509    | 9.25             |
| 366.10                | 0.0872 | HOMO-5 $\rightarrow$ LUMO   | 0.15553     | 4.84             |
|                       |        | HOMO-1 $\rightarrow$ LUMO+3 | 0.25266     | 12.76            |
|                       |        | HOMO $\rightarrow$ LUMO+2   | 0.61734     | 76.22            |
| 363.57                | 0      | HOMO-4 $\rightarrow$ LUMO   | 0.65067     | 84.67            |
|                       |        | HOMO-2 $\rightarrow$ LUMO+1 | 0.22847     | 10.43            |
| 360.54                | 0.105  | HOMO-3 $\rightarrow$ LUMO   | 0.11515     | 2.65             |
|                       |        | HOMO-2 $\rightarrow$ LUMO+1 | -0.14252    | 4.06             |
|                       |        | HOMO-1 $\rightarrow$ LUMO+2 | 0.47361     | 44.86            |
|                       |        | HOMO $\rightarrow$ LUMO+3   | 0.48710     | 47.45            |
| 359.44                | 0.1579 | HOMO-5 $\rightarrow$ LUMO   | 0.65980     | 87.06            |
|                       |        | HOMO $\rightarrow$ LUMO+2   | -0.17123    | 5.86             |
| 355.95                | 0.0146 | HOMO-4 $\rightarrow$ LUMO   | -0.16230    | 5.26             |
|                       |        | HOMO-3 $\rightarrow$ LUMO   | 0.20130     | 8.10             |

|        |        |                 |          |       |
|--------|--------|-----------------|----------|-------|
|        |        | HOMO-2 → LUMO+1 | 0.20540  | 8.43  |
|        |        | HOMO-2 → LUMO+2 | -0.11484 | 2.63  |
|        |        | HOMO-1 → LUMO+2 | -0.41402 | 34.28 |
|        |        | HOMO → LUMO+3   | 0.42057  | 35.37 |
| 350.87 | 0.4472 | HOMO-1 → LUMO+3 | 0.61884  | 76.59 |
|        |        | HOMO → LUMO+2   | -0.21289 | 9.06  |
| 348.17 | 0.2779 | HOMO-4 → LUMO   | -0.17562 | 6.16  |
|        |        | HOMO-2 → LUMO+1 | 0.59875  | 71.70 |
|        |        | HOMO-1 → LUMO+2 | 0.27110  | 14.69 |
| 335.75 | 0.0066 | HOMO-5 → LUMO   | -0.12070 | 2.91  |
|        |        | HOMO-5 → LUMO+3 | 0.13727  | 3.76  |
|        |        | HOMO-4 → LUMO+1 | 0.16973  | 5.76  |
|        |        | HOMO-3 → LUMO+1 | 0.30209  | 18.25 |
|        |        | HOMO-3 → LUMO+2 | 0.21287  | 9.06  |
|        |        | HOMO-2 → LUMO+3 | 0.28783  | 16.56 |
|        |        | HOMO-1 → LUMO+4 | 0.28355  | 16.08 |
|        |        | HOMO-1 → LUMO+7 | 0.12562  | 3.156 |
|        |        | HOMO → LUMO+5   | 0.28162  | 15.86 |
| 335.66 | 0.0577 | HOMO-5 → LUMO+1 | -0.15416 | 4.75  |
|        |        | HOMO-5 → LUMO+2 | -0.12721 | 3.23  |
|        |        | HOMO-3 → LUMO   | 0.12027  | 2.89  |
|        |        | HOMO-3 → LUMO+3 | -0.19850 | 7.88  |
|        |        | HOMO-2 → LUMO+1 | 0.10843  | 2.35  |
|        |        | HOMO-2 → LUMO+2 | -0.34010 | 23.13 |
|        |        | HOMO-1 → LUMO+5 | 0.22443  | 10.07 |
|        |        | HOMO-1 → LUMO+6 | -0.10774 | 2.32  |
|        |        | HOMO → LUMO+4   | 0.40906  | 33.46 |
|        |        | HOMO → LUMO+7   | 0.14709  | 4.32  |
| 327.5  | 0.0938 | HOMO-8 → LUMO   | -0.28863 | 16.66 |
|        |        | HOMO-7 → LUMO   | -0.14378 | 4.13  |
|        |        | HOMO-4 → LUMO+1 | -0.30840 | 19.02 |

|        |        |                 |          |       |
|--------|--------|-----------------|----------|-------|
|        |        | HOMO-3 → LUMO+1 | 0.50756  | 51.52 |
| 320.34 | 0.0407 | HOMO-8 → LUMO   | 0.20373  | 8.30  |
|        |        | HOMO-4 → LUMO+1 | 0.46579  | 43.39 |
|        |        | HOMO-3 → LUMO+1 | 0.32521  | 21.15 |
|        |        | HOMO-2 → LUMO+3 | -0.11627 | 2.70  |
|        |        | HOMO-1 → LUMO+4 | -0.25432 | 12.93 |
|        |        | HOMO → LUMO+5   | -0.12406 | 3.07  |
| 317.35 | 0.2864 | HOMO-8 → LUMO   | 0.53999  | 58.31 |
|        |        | HOMO-4 → LUMO+1 | -0.31258 | 19.54 |
|        |        | HOMO-3 → LUMO+1 | 0.13136  | 3.45  |
|        |        | HOMO-2 → LUMO+3 | -0.17282 | 5.97  |
|        |        | HOMO-1 → LUMO+4 | 0.13098  | 3.43  |
| 316.93 | 0.13   | HOMO-6 → LUMO   | 0.63203  | 79.89 |
|        |        | HOMO-5 → LUMO+1 | 0.14419  | 4.15  |
|        |        | HOMO-2 → LUMO+2 | -0.15943 | 5.08  |
|        |        | HOMO → LUMO+4   | -0.14657 | 4.29  |
| 315.41 | 0.2389 | HOMO-6 → LUMO   | 0.20825  | 8.67  |
|        |        | HOMO-2 → LUMO+2 | 0.37254  | 27.75 |
|        |        | HOMO-1 → LUMO+5 | -0.16910 | 5.71  |
|        |        | HOMO → LUMO+4   | 0.49254  | 48.51 |
|        |        | HOMO → LUMO+7   | -0.13191 | 3.48  |
| 314.64 | 0.0733 | HOMO-8 → LUMO   | -0.12524 | 3.13  |
|        |        | HOMO-7 → LUMO   | 0.64001  | 81.92 |
|        |        | HOMO-1 → LUMO+4 | -0.13871 | 3.84  |
|        |        | HOMO → LUMO+6   | 0.11841  | 2.80  |
| 313.01 | 0.0038 | HOMO-6 → LUMO   | -0.15178 | 4.60  |
|        |        | HOMO-5 → LUMO+1 | 0.51908  | 53.88 |
|        |        | HOMO-2 → LUMO+2 | -0.29682 | 17.62 |
|        |        | HOMO-1 → LUMO+5 | -0.17914 | 6.418 |
|        |        | HOMO → LUMO+4   | 0.16641  | 5.53  |
| 311.35 | 0.0022 | HOMO-7 → LUMO   | 0.12986  | 3.37  |

|        |        |                 |          |       |
|--------|--------|-----------------|----------|-------|
|        |        | HOMO-4 → LUMO+1 | 0.16009  | 5.12  |
|        |        | HOMO-2 → LUMO+3 | -0.16515 | 5.45  |
|        |        | HOMO-1 → LUMO+4 | 0.50075  | 50.15 |
|        |        | HOMO → LUMO+5   | -0.39199 | 30.73 |
| 309.04 | 0.0034 | HOMO-8 → LUMO   | 0.13633  | 3.71  |
|        |        | HOMO-4 → LUMO+2 | -0.10488 | 2.20  |
|        |        | HOMO-3 → LUMO+2 | -0.23074 | 10.64 |
|        |        | HOMO-2 → LUMO+3 | 0.56424  | 63.67 |
|        |        | HOMO → LUMO+5   | -0.25500 | 13.00 |
| 308.35 | 0.1857 | HOMO-5 → LUMO+1 | 0.40154  | 32.24 |
|        |        | HOMO-5 → LUMO+2 | -0.16497 | 5.44  |
|        |        | HOMO-3 → LUMO+3 | -0.14904 | 4.44  |
|        |        | HOMO-2 → LUMO+2 | 0.26740  | 14.30 |
|        |        | HOMO-1 → LUMO+5 | 0.39450  | 31.12 |
|        |        | HOMO → LUMO+7   | 0.13685  | 3.74  |

**Table S6b:** TD-DFT-calculated UV/Vis absorption data for the protonated **HELI-2** at the B3LYP/6-31g(d,p) (solvent CPCM-CH<sub>2</sub>Cl<sub>2</sub>) level of theory.

| Calcd. $\lambda$ [nm] | $f$    | Composition     | Coefficient | Contribution (%) |
|-----------------------|--------|-----------------|-------------|------------------|
| 593.24                | 0.1466 | HOMO → LUMO     | 0.70547     | 99.53            |
| 586.06                | 0.0256 | HOMO-1 → LUMO   | 0.70463     | 99.30            |
| 477.44                | 0.0615 | HOMO-2 → LUMO   | 0.20088     | 8.07             |
|                       |        | HOMO → LUMO+1   | 0.67251     | 90.45            |
| 464.09                | 0.122  | HOMO-2 → LUMO   | 0.67400     | 90.85            |
|                       |        | HOMO → LUMO+1   | -0.20133    | 8.10             |
| 461.32                | 0.0599 | HOMO-3 → LUMO   | -0.35131    | 24.68            |
|                       |        | HOMO-1 → LUMO+1 | 0.60833     | 74.01            |
| 451.3                 | 0.08   | HOMO-3 → LUMO   | 0.60758     | 73.83            |
|                       |        | HOMO-1 → LUMO+1 | 0.34781     | 24.19            |

|        |        |                 |          |       |
|--------|--------|-----------------|----------|-------|
| 419.58 | 0.132  | HOMO-4 → LUMO   | 0.69140  | 95.60 |
| 413.14 | 0.0961 | HOMO-5 → LUMO   | 0.69604  | 96.89 |
| 385.98 | 0.0517 | HOMO-2 → LUMO+1 | 0.68641  | 94.23 |
| 379.13 | 0.0242 | HOMO-3 → LUMO+1 | 0.68234  | 93.11 |
|        |        | HOMO → LUMO+3   | 0.13573  | 3.86  |
| 374.6  | 0.0323 | HOMO-9 → LUMO   | 0.14877  | 4.42  |
|        |        | HOMO-6 → LUMO   | 0.67500  | 91.12 |
| 371.44 | 0.0001 | HOMO-8 → LUMO   | 0.18449  | 6.80  |
|        |        | HOMO-7 → LUMO   | 0.66189  | 87.62 |
| 368.39 | 0.01   | HOMO-8 → LUMO   | 0.24424  | 11.93 |
|        |        | HOMO-1 → LUMO+2 | -0.35795 | 25.62 |
|        |        | HOMO → LUMO+3   | 0.52482  | 55.08 |
| 367.86 | 0.105  | HOMO-1 → LUMO+3 | -0.32012 | 20.49 |
|        |        | HOMO → LUMO+2   | 0.61583  | 75.85 |
| 366.28 | 0.0429 | HOMO-12 → LUMO  | -0.17691 | 6.26  |
|        |        | HOMO-8 → LUMO   | 0.55705  | 62.06 |
|        |        | HOMO-7 → LUMO   | -0.11653 | 2.71  |
|        |        | HOMO-4 → LUMO+1 | 0.21589  | 9.32  |
|        |        | HOMO-1 → LUMO+2 | 0.20773  | 8.63  |
|        |        | HOMO → LUMO+3   | -0.17563 | 6.16  |
| 358.44 | 0      | HOMO-9 → LUMO   | 0.61854  | 76.51 |
|        |        | HOMO-6 → LUMO   | -0.11334 | 2.56  |
|        |        | HOMO-1 → LUMO+3 | -0.20600 | 8.48  |
|        |        | HOMO → LUMO+2   | -0.16777 | 5.63  |
| 357.18 | 0.1247 | HOMO-10 → LUMO  | 0.10085  | 2.03  |
|        |        | HOMO-4 → LUMO+1 | -0.36693 | 26.92 |
|        |        | HOMO-1 → LUMO+2 | 0.47737  | 45.57 |
|        |        | HOMO → LUMO+3   | 0.29054  | 16.88 |
| 354.89 | 0.0342 | HOMO-11 → LUMO  | -0.15663 | 4.90  |
|        |        | HOMO-9 → LUMO   | 0.26079  | 13.60 |

|        |        |                 |          |       |
|--------|--------|-----------------|----------|-------|
|        |        | HOMO-2 → LUMO+1 | 0.11249  | 2.53  |
|        |        | HOMO-1 → LUMO+3 | 0.54323  | 59.02 |
|        |        | HOMO → LUMO+2   | 0.24084  | 11.60 |
| 353.07 | 0.3019 | HOMO-12 → LUMO  | -0.21612 | 9.34  |
|        |        | HOMO-10 → LUMO  | 0.13653  | 3.72  |
|        |        | HOMO-8 → LUMO   | -0.26052 | 13.57 |
|        |        | HOMO-7 → LUMO   | 0.16912  | 5.72  |
|        |        | HOMO-4 → LUMO+1 | 0.46487  | 43.22 |
|        |        | HOMO-1 → LUMO+2 | 0.23294  | 10.85 |
|        |        | HOMO → LUMO+3   | 0.17895  | 6.40  |
| 347.34 | 0.437  | HOMO-12 → LUMO  | 0.45189  | 40.84 |
|        |        | HOMO-10 → LUMO  | -0.39358 | 30.98 |
|        |        | HOMO-4 → LUMO+1 | 0.24782  | 12.28 |
|        |        | HOMO-1 → LUMO+2 | 0.12891  | 3.32  |
|        |        | HOMO → LUMO+3   | 0.15750  | 4.96  |
| 345.51 | 0.0339 | HOMO-13 → LUMO  | 0.10758  | 2.31  |
|        |        | HOMO-11 → LUMO  | 0.58398  | 68.20 |
|        |        | HOMO-5 → LUMO+1 | -0.31214 | 19.49 |
|        |        | HOMO-1 → LUMO+3 | 0.14328  | 4.10  |
| 343.6  | 0.0202 | HOMO-12 → LUMO  | 0.43022  | 37.01 |
|        |        | HOMO-10 → LUMO  | 0.51700  | 53.46 |
| 342.19 | 0.1082 | HOMO-13 → LUMO  | 0.12361  | 3.06  |
|        |        | HOMO-11 → LUMO  | 0.28509  | 16.25 |
|        |        | HOMO-5 → LUMO+1 | 0.59754  | 71.41 |
| 339.8  | 0.0029 | HOMO-13 → LUMO  | 0.66676  | 88.91 |
|        |        | HOMO-11 → LUMO  | -0.13618 | 3.70  |
| 336.94 | 0.0046 | HOMO-10 → LUMO  | -0.10847 | 2.35  |
|        |        | HOMO-3 → LUMO+3 | -0.24607 | 12.11 |
|        |        | HOMO-2 → LUMO+2 | 0.353096 | 24.94 |
|        |        | HOMO-1 → LUMO+5 | -0.22213 | 9.87  |
|        |        | HOMO-1 → LUMO+7 | -0.15540 | 4.83  |

|  |  |               |         |       |
|--|--|---------------|---------|-------|
|  |  | HOMO → LUMO+4 | 0.38733 | 30.00 |
|  |  | HOMO → LUMO+6 | 0.20874 | 8.71  |

#### S14. Computational ECD Spectra

Gaussian 09 software was used for DFT calculations.<sup>[S4]</sup> TD-DFT has been performed using the B3LYP/6-31g(d,p) level of theory in dichloromethane using the CPCM model at 298.15 K and 1 atm.

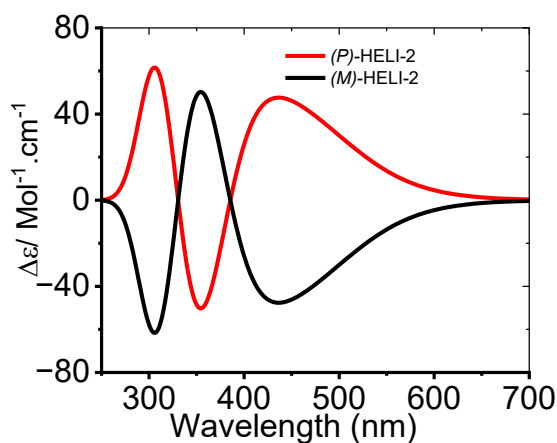

Figure S64. Computed ECD spectra of (*P*)-HELI-2 and (*M*)-HELI-2 in DCM.

#### S15. Cartesian Coordinates of the DFT Computed Molecules

##### HELI-1

|   |              |              |              |
|---|--------------|--------------|--------------|
| N | 2.333032000  | 1.334814000  | 0.078572000  |
| N | 0.016211000  | 1.369901000  | -0.312392000 |
| N | -4.526493000 | 1.165311000  | -0.357450000 |
| N | 4.541389000  | 0.969853000  | -0.231339000 |
| N | -2.300652000 | 1.351129000  | -0.700889000 |
| C | 1.165579000  | 2.033731000  | -0.236981000 |
| C | -1.103015000 | 2.050662000  | -0.538639000 |
| C | 2.591763000  | 0.034131000  | 0.549061000  |
| C | -1.902004000 | -1.135041000 | -1.438795000 |

|   |              |              |              |
|---|--------------|--------------|--------------|
| C | 3.954540000  | -0.150636000 | 0.293513000  |
| C | -2.619491000 | -0.007743000 | -0.881852000 |
| C | 1.291235000  | 3.424261000  | -0.522514000 |
| C | -1.165514000 | 3.474260000  | -0.572231000 |
| C | 2.501201000  | -2.145599000 | 1.631077000  |
| C | -3.991615000 | -0.068527000 | -0.615232000 |
| C | 4.626860000  | -1.389433000 | 0.583182000  |
| C | 5.117597000  | 3.686162000  | -1.043625000 |
| H | 5.630211000  | 2.858589000  | -1.543858000 |
| H | 5.101431000  | 4.521177000  | -1.749810000 |
| C | 0.078031000  | 4.116977000  | -0.621836000 |
| H | 0.102230000  | 5.190721000  | -0.740454000 |
| C | 1.828138000  | -0.911562000 | 1.334025000  |
| C | -3.512811000 | 2.010989000  | -0.435772000 |
| C | 2.592663000  | 4.041188000  | -0.740830000 |
| C | -2.437451000 | 4.181638000  | -0.514493000 |
| C | 3.857374000  | -2.393595000 | 1.235011000  |
| C | -3.588182000 | 3.445633000  | -0.361304000 |
| C | 3.569530000  | 1.861159000  | -0.332167000 |
| C | 3.707800000  | 3.238072000  | -0.726063000 |
| C | -0.624808000 | -1.090048000 | -2.022894000 |
| H | -0.098902000 | -0.149407000 | -2.015154000 |
| C | 2.659568000  | 5.528096000  | -1.013656000 |
| H | 3.587623000  | 5.768412000  | -1.537742000 |
| H | 1.852386000  | 5.819348000  | -1.696444000 |
| C | -4.723487000 | -1.306988000 | -0.642811000 |
| C | -2.636825000 | -2.369023000 | -1.481490000 |
| C | 5.962241000  | -1.626240000 | 0.250297000  |
| H | 6.508451000  | -0.827314000 | -0.239497000 |

|   |              |              |              |
|---|--------------|--------------|--------------|
| C | -4.970368000 | 4.015238000  | -0.135781000 |
| H | -5.681889000 | 3.450261000  | -0.747608000 |
| H | -5.014273000 | 5.054534000  | -0.471283000 |
| C | 0.563158000  | -0.679931000 | 1.899992000  |
| H | 0.085973000  | 0.266242000  | 1.702963000  |
| C | 1.811632000  | -3.138887000 | 2.389452000  |
| C | -0.089811000 | -1.628780000 | 2.700365000  |
| C | -4.004488000 | -2.462127000 | -1.059012000 |
| C | 4.487779000  | -3.635608000 | 1.534904000  |
| C | 0.534743000  | -2.863642000 | 2.898891000  |
| H | 0.045577000  | -3.635805000 | 3.485463000  |
| C | 7.376492000  | 4.478825000  | -0.156208000 |
| H | 7.396992000  | 5.329958000  | -0.846346000 |
| H | 7.941825000  | 4.760872000  | 0.737789000  |
| H | 7.905308000  | 3.648623000  | -0.637753000 |
| C | 2.580863000  | 6.397399000  | 0.261516000  |
| H | 3.411721000  | 6.130673000  | 0.925099000  |
| H | 1.664342000  | 6.162452000  | 0.816107000  |
| C | -0.022648000 | -2.214278000 | -2.606500000 |
| C | -2.432753000 | 5.695621000  | -0.545730000 |
| H | -1.681405000 | 6.043208000  | -1.264283000 |
| H | -3.388861000 | 6.059044000  | -0.931316000 |
| C | 5.940093000  | 4.086180000  | 0.199254000  |
| H | 5.947417000  | 3.245969000  | 0.902474000  |
| H | 5.444855000  | 4.919536000  | 0.712119000  |
| C | 6.587445000  | -2.854873000 | 0.525423000  |
| C | 5.830424000  | -3.840572000 | 1.164879000  |
| H | 6.272947000  | -4.800889000 | 1.404695000  |
| C | -6.069297000 | -1.402949000 | -0.282813000 |

|   |              |              |              |
|---|--------------|--------------|--------------|
| H | -6.574875000 | -0.493273000 | 0.022156000  |
| C | -1.998241000 | -3.530945000 | -2.010074000 |
| C | -2.167204000 | 6.360715000  | 0.822373000  |
| H | -2.951294000 | 6.055722000  | 1.525081000  |
| H | -1.224347000 | 5.985437000  | 1.238174000  |
| C | -6.842994000 | 4.505739000  | 1.528094000  |
| H | -6.896220000 | 5.557531000  | 1.224484000  |
| H | -7.575156000 | 3.950743000  | 0.930821000  |
| H | -7.153023000 | 4.445139000  | 2.576248000  |
| C | -2.120525000 | 7.888080000  | 0.729191000  |
| H | -1.319328000 | 8.220548000  | 0.059371000  |
| H | -3.063790000 | 8.290623000  | 0.343378000  |
| H | -1.942485000 | 8.337687000  | 1.711065000  |
| C | -6.754281000 | -2.630341000 | -0.298534000 |
| C | -0.709688000 | -3.430383000 | -2.553377000 |
| H | -0.260778000 | -4.329848000 | -2.964468000 |
| C | -4.695901000 | -3.707145000 | -1.099246000 |
| C | 2.625065000  | 7.895446000  | -0.050750000 |
| H | 3.549349000  | 8.164181000  | -0.574225000 |
| H | 1.784462000  | 8.193064000  | -0.687837000 |
| H | 2.575650000  | 8.490490000  | 0.866507000  |
| C | -5.432739000 | 3.942310000  | 1.335801000  |
| H | -4.724040000 | 4.491443000  | 1.967711000  |
| H | -5.400922000 | 2.897726000  | 1.663303000  |
| C | -6.047145000 | -3.764171000 | -0.708436000 |
| H | -6.536953000 | -4.730780000 | -0.745224000 |
| C | -8.233458000 | -2.680169000 | 0.128835000  |
| C | -8.821557000 | -4.101185000 | 0.044035000  |
| H | -9.869691000 | -4.082972000 | 0.358704000  |

|   |               |              |              |
|---|---------------|--------------|--------------|
| H | -8.790366000  | -4.495902000 | -0.976799000 |
| H | -8.292226000  | -4.801385000 | 0.698419000  |
| C | -8.360167000  | -2.191760000 | 1.591669000  |
| H | -7.788056000  | -2.833986000 | 2.269494000  |
| H | -7.996443000  | -1.167137000 | 1.712510000  |
| H | -9.408786000  | -2.213093000 | 1.908429000  |
| C | -9.066348000  | -1.756935000 | -0.792022000 |
| H | -8.726013000  | -0.718453000 | -0.744209000 |
| H | -9.002889000  | -2.084325000 | -1.835097000 |
| H | -10.120431000 | -1.776453000 | -0.493705000 |
| C | 1.347653000   | -2.149608000 | -3.310348000 |
| C | 1.182265000   | -2.592918000 | -4.784158000 |
| H | 2.147422000   | -2.550537000 | -5.301089000 |
| H | 0.806400000   | -3.617000000 | -4.863405000 |
| H | 0.484411000   | -1.936385000 | -5.314555000 |
| C | 2.338922000   | -3.101161000 | -2.600015000 |
| H | 3.316059000   | -3.067982000 | -3.094584000 |
| H | 2.478323000   | -2.813140000 | -1.553531000 |
| H | 1.991587000   | -4.138535000 | -2.619813000 |
| C | 1.947581000   | -0.731746000 | -3.306267000 |
| H | 2.125490000   | -0.368504000 | -2.290339000 |
| H | 2.910371000   | -0.741371000 | -3.827134000 |
| H | 1.300064000   | -0.014140000 | -3.820760000 |
| C | 8.058536000   | -3.066809000 | 0.120602000  |
| C | 8.577441000   | -4.465333000 | 0.503830000  |
| H | 9.622596000   | -4.565477000 | 0.194234000  |
| H | 8.535587000   | -4.634220000 | 1.584813000  |
| H | 8.009200000   | -5.260845000 | 0.010862000  |
| C | 8.196557000   | -2.903766000 | -1.411907000 |

|   |              |              |              |
|---|--------------|--------------|--------------|
| H | 7.587580000  | -3.644651000 | -1.940523000 |
| H | 7.883140000  | -1.910369000 | -1.746048000 |
| H | 9.240122000  | -3.043977000 | -1.715017000 |
| C | 8.943162000  | -2.012634000 | 0.827910000  |
| H | 8.656903000  | -0.992324000 | 0.556683000  |
| H | 8.868198000  | -2.105171000 | 1.916479000  |
| H | 9.993196000  | -2.150308000 | 0.547031000  |
| C | -1.451238000 | -1.351647000 | 3.368774000  |
| C | -1.303589000 | -1.497912000 | 4.902778000  |
| H | -2.263336000 | -1.304439000 | 5.394585000  |
| H | -0.979834000 | -2.502945000 | 5.188209000  |
| H | -0.571324000 | -0.784472000 | 5.295476000  |
| C | -2.495375000 | -2.372277000 | 2.858106000  |
| H | -3.464373000 | -2.193795000 | 3.337300000  |
| H | -2.631613000 | -2.286745000 | 1.775680000  |
| H | -2.199395000 | -3.401930000 | 3.079817000  |
| C | -1.974925000 | 0.065987000  | 3.074599000  |
| H | -1.289158000 | 0.837565000  | 3.439832000  |
| H | -2.134425000 | 0.225483000  | 2.004463000  |
| H | -2.936192000 | 0.212945000  | 3.577279000  |
| C | -3.993346000 | -4.871149000 | -1.565140000 |
| C | -2.710157000 | -4.782040000 | -2.008846000 |
| C | 2.461426000  | -4.397048000 | 2.648599000  |
| C | 3.734154000  | -4.640259000 | 2.233571000  |
| H | 1.909452000  | -5.152786000 | 3.200951000  |
| H | 4.211184000  | -5.593310000 | 2.445409000  |
| H | -4.517356000 | -5.823014000 | -1.578507000 |
| H | -2.196393000 | -5.662053000 | -2.386327000 |

**HELI-1-TS:**

|   |              |              |              |
|---|--------------|--------------|--------------|
| C | -1.185931000 | 3.463740000  | -0.670768000 |
| C | -1.122376000 | 2.121903000  | -0.201849000 |
| C | 0.039918000  | 4.123739000  | -0.792733000 |
| C | -2.402448000 | 4.005375000  | -1.280292000 |
| N | 0.013320000  | 1.479570000  | 0.092810000  |
| N | -2.324129000 | 1.387855000  | -0.281764000 |
| C | 1.252480000  | 3.440911000  | -0.665507000 |
| H | 0.049795000  | 5.139523000  | -1.163236000 |
| C | -3.332052000 | 3.106571000  | -1.735236000 |
| C | -2.522558000 | 5.496704000  | -1.495074000 |
| C | 1.161704000  | 2.099066000  | -0.200917000 |
| C | -3.192972000 | 1.727336000  | -1.340192000 |
| C | -2.611953000 | 0.050331000  | 0.025143000  |
| C | -4.531718000 | 3.438797000  | -2.595000000 |
| H | -1.668495000 | 5.872129000  | -2.074734000 |
| H | -3.406249000 | 5.711821000  | -2.099645000 |
| C | -2.622701000 | 6.294967000  | -0.177180000 |
| N | 2.347976000  | 1.339710000  | -0.286411000 |
| N | -3.874176000 | 0.684429000  | -1.779662000 |
| C | -3.497983000 | -0.362350000 | -0.968698000 |
| C | -2.504111000 | -0.674255000 | 1.265420000  |
| C | 3.389052000  | 3.044229000  | -1.733185000 |
| H | -4.301129000 | 4.275413000  | -3.261587000 |
| H | -4.737100000 | 2.573882000  | -3.233264000 |
| C | -5.801303000 | 3.763711000  | -1.781091000 |
| H | -1.743608000 | 6.091626000  | 0.445708000  |
| H | -3.489384000 | 5.934245000  | 0.390223000  |
| C | -2.747831000 | 7.801582000  | -0.417648000 |

|   |              |              |              |
|---|--------------|--------------|--------------|
| C | 2.602515000  | -0.008360000 | 0.005523000  |
| C | 3.216574000  | 1.665163000  | -1.349827000 |
| C | -3.952314000 | -1.727125000 | -1.044156000 |
| C | -3.005482000 | -2.013641000 | 1.236414000  |
| C | -2.218385000 | -0.075905000 | 2.503699000  |
| C | 4.595774000  | 3.354559000  | -2.591266000 |
| H | -6.024538000 | 2.918369000  | -1.119390000 |
| H | -5.604815000 | 4.624015000  | -1.129142000 |
| C | -7.009019000 | 4.056840000  | -2.675122000 |
| H | -2.822985000 | 8.346848000  | 0.528372000  |
| H | -1.877767000 | 8.189774000  | -0.959185000 |
| H | -3.639126000 | 8.036018000  | -1.010262000 |
| C | 3.466325000  | -0.435646000 | -1.001243000 |
| C | 2.493012000  | -0.741166000 | 1.242103000  |
| N | 3.864508000  | 0.608463000  | -1.805486000 |
| C | -3.637488000 | -2.557854000 | 0.071260000  |
| C | -4.663171000 | -2.247274000 | -2.127263000 |
| C | -2.989673000 | -2.776558000 | 2.439493000  |
| C | -2.426474000 | -0.758713000 | 3.712820000  |
| H | -1.940684000 | 0.970740000  | 2.512142000  |
| H | 4.774834000  | 2.492971000  | -3.241953000 |
| H | 4.387285000  | 4.206448000  | -3.245602000 |
| C | 5.876010000  | 3.632035000  | -1.776575000 |
| H | -7.898065000 | 4.282177000  | -2.077522000 |
| H | -6.819417000 | 4.915956000  | -3.328590000 |
| H | -7.244845000 | 3.199116000  | -3.314972000 |
| C | 3.878322000  | -1.812816000 | -1.098079000 |
| C | 2.951102000  | -2.096863000 | 1.190225000  |
| C | 2.248682000  | -0.149739000 | 2.490164000  |

|   |              |              |              |
|---|--------------|--------------|--------------|
| C | -4.080864000 | -3.909707000 | 0.058299000  |
| C | -5.057913000 | -3.596823000 | -2.174297000 |
| H | -4.893290000 | -1.577950000 | -2.949461000 |
| C | -2.707465000 | -2.130271000 | 3.652721000  |
| H | 6.076764000  | 2.771764000  | -1.127000000 |
| H | 5.705828000  | 4.488570000  | -1.112386000 |
| C | 7.089687000  | 3.902873000  | -2.669544000 |
| C | 3.549827000  | -2.647063000 | 0.010760000  |
| C | 4.560577000  | -2.341177000 | -2.194816000 |
| C | 2.927718000  | -2.871420000 | 2.383708000  |
| C | 2.459210000  | -0.851938000 | 3.691730000  |
| H | 2.007209000  | 0.906252000  | 2.515691000  |
| C | -4.755771000 | -4.404905000 | -1.073847000 |
| H | -2.803137000 | -2.706984000 | 4.567782000  |
| H | 7.985988000  | 4.094405000  | -2.070983000 |
| H | 7.299728000  | 3.047709000  | -3.321700000 |
| H | 6.923554000  | 4.776066000  | -3.310625000 |
| C | 3.949463000  | -4.012040000 | -0.023550000 |
| C | 4.912044000  | -3.702320000 | -2.262817000 |
| H | 4.803482000  | -1.669251000 | -3.011134000 |
| C | 2.690485000  | -2.229803000 | 3.611801000  |
| H | -5.064690000 | -5.444098000 | -1.057563000 |
| C | 4.595857000  | -4.514298000 | -1.169851000 |
| H | 2.780094000  | -2.824074000 | 4.514330000  |
| H | 4.871646000  | -5.562913000 | -1.169891000 |
| C | 2.481625000  | 3.960678000  | -1.269554000 |
| C | 2.638012000  | 5.450793000  | -1.466638000 |
| H | 1.791287000  | 5.855764000  | -2.036880000 |
| H | 3.524486000  | 5.651675000  | -2.072099000 |

|   |              |              |              |
|---|--------------|--------------|--------------|
| C | 2.763406000  | 6.227901000  | -0.138169000 |
| H | 1.881767000  | 6.037337000  | 0.485177000  |
| H | 3.622978000  | 5.837576000  | 0.420352000  |
| C | 2.925076000  | 7.734120000  | -0.358276000 |
| H | 3.819621000  | 7.954438000  | -0.951415000 |
| H | 2.062877000  | 8.151267000  | -0.890792000 |
| H | 3.017438000  | 8.264255000  | 0.594801000  |
| C | -2.515638000 | -0.028019000 | 5.068477000  |
| C | -5.806756000 | -4.124478000 | -3.412968000 |
| C | 2.643429000  | -0.100817000 | 5.026441000  |
| C | 5.632591000  | -4.236399000 | -3.515440000 |
| C | 2.353049000  | -0.997913000 | 6.248809000  |
| H | 3.080488000  | -1.809527000 | 6.342433000  |
| H | 2.416327000  | -0.403322000 | 7.165630000  |
| H | 1.356397000  | -1.445378000 | 6.204776000  |
| C | 4.131865000  | 0.333099000  | 5.095755000  |
| H | 4.328182000  | 0.865691000  | 6.033500000  |
| H | 4.797694000  | -0.534489000 | 5.050014000  |
| H | 4.386763000  | 0.999944000  | 4.265907000  |
| C | 1.772850000  | 1.166823000  | 5.114252000  |
| H | 2.051487000  | 1.911675000  | 4.363339000  |
| H | 0.714976000  | 0.935081000  | 4.983578000  |
| H | 1.897449000  | 1.636844000  | 6.095014000  |
| C | -3.981946000 | -0.129512000 | 5.563431000  |
| H | -4.284419000 | -1.169489000 | 5.716654000  |
| H | -4.095015000 | 0.399150000  | 6.516640000  |
| H | -4.671730000 | 0.319795000  | 4.841522000  |
| C | -1.597479000 | -0.688234000 | 6.117778000  |
| H | -0.553881000 | -0.661579000 | 5.800195000  |

|   |              |              |              |
|---|--------------|--------------|--------------|
| H | -1.675129000 | -0.161184000 | 7.074804000  |
| H | -1.866079000 | -1.733609000 | 6.295967000  |
| C | -2.170271000 | 1.468807000  | 4.955094000  |
| H | -2.216934000 | 1.933276000  | 5.945122000  |
| H | -1.166710000 | 1.638293000  | 4.556523000  |
| H | -2.880686000 | 1.995839000  | 4.310216000  |
| C | 5.941685000  | -5.742026000 | -3.417981000 |
| H | 6.445790000  | -6.071873000 | -4.331882000 |
| H | 6.603280000  | -5.969185000 | -2.575693000 |
| H | 5.030536000  | -6.339248000 | -3.309202000 |
| C | 6.969815000  | -3.480346000 | -3.701357000 |
| H | 6.816787000  | -2.404028000 | -3.822265000 |
| H | 7.628031000  | -3.632231000 | -2.839451000 |
| H | 7.489546000  | -3.845755000 | -4.593909000 |
| C | 4.738686000  | -4.007203000 | -4.757572000 |
| H | 3.788343000  | -4.542634000 | -4.660136000 |
| H | 4.513243000  | -2.947429000 | -4.907935000 |
| H | 5.242956000  | -4.372443000 | -5.659123000 |
| C | -6.162740000 | -5.618007000 | -3.291904000 |
| H | -6.823866000 | -5.812275000 | -2.441038000 |
| H | -6.684996000 | -5.944110000 | -4.196885000 |
| H | -5.270307000 | -6.242666000 | -3.182074000 |
| C | -4.917587000 | -3.940672000 | -4.665965000 |
| H | -4.662697000 | -2.890354000 | -4.834420000 |
| H | -3.982381000 | -4.502080000 | -4.568361000 |
| H | -5.440263000 | -4.304572000 | -5.557538000 |
| C | -7.120931000 | -3.328803000 | -3.597775000 |
| H | -7.775590000 | -3.447448000 | -2.727985000 |
| H | -6.934572000 | -2.259793000 | -3.735404000 |

|   |              |              |              |
|---|--------------|--------------|--------------|
| H | -7.660505000 | -3.689601000 | -4.480409000 |
| C | -3.382287000 | -4.161278000 | 2.381715000  |
| C | -3.877062000 | -4.709795000 | 1.237353000  |
| C | 3.734091000  | -4.818827000 | 1.148107000  |
| C | 3.272212000  | -4.267204000 | 2.305279000  |
| H | -3.300557000 | -4.757268000 | 3.286695000  |
| H | -4.182340000 | -5.752495000 | 1.214892000  |
| H | 4.004785000  | -5.870594000 | 1.110271000  |
| H | 3.183294000  | -4.870513000 | 3.204735000  |

**(P)-HELI-2:**

|   |              |              |              |
|---|--------------|--------------|--------------|
| N | 2.308576000  | 0.688158000  | -0.438616000 |
| N | 0.000019000  | 0.718087000  | 0.000031000  |
| N | -4.534755000 | 0.413912000  | 0.148405000  |
| N | 4.534768000  | 0.413938000  | -0.148436000 |
| N | -2.308551000 | 0.688129000  | 0.438633000  |
| C | 1.130618000  | 1.392817000  | -0.185360000 |
| C | -1.130598000 | 1.392797000  | 0.185402000  |
| C | 2.589526000  | -0.653225000 | -0.754669000 |
| C | -1.834473000 | -1.708032000 | 1.397749000  |
| C | 3.963736000  | -0.772424000 | -0.516450000 |
| C | -2.589515000 | -0.653249000 | 0.754678000  |
| C | 1.223226000  | 2.811730000  | -0.081574000 |
| C | -1.223211000 | 2.811714000  | 0.081661000  |
| C | 2.541879000  | -2.945906000 | -1.574272000 |
| C | -3.963724000 | -0.772444000 | 0.516440000  |
| C | 4.666721000  | -2.015895000 | -0.680154000 |
| C | 0.000006000  | 3.487300000  | 0.000053000  |
| H | -0.000013000 | 4.568757000  | 0.000068000  |
| C | 1.834463000  | -1.708008000 | -1.397715000 |
| C | -3.548011000 | 1.287312000  | 0.125860000  |

|   |              |              |              |
|---|--------------|--------------|--------------|
| C | 2.513506000  | 3.478252000  | 0.012338000  |
| C | -2.513497000 | 3.478237000  | -0.012260000 |
| C | 3.914673000  | -3.108391000 | -1.191870000 |
| C | -3.655231000 | 2.710821000  | -0.069989000 |
| C | 3.548028000  | 1.287335000  | -0.125836000 |
| C | 3.655244000  | 2.710847000  | 0.070010000  |
| C | -0.546696000 | -1.582727000 | 1.943229000  |
| H | -0.038608000 | -0.639284000 | 1.830574000  |
| C | -4.666716000 | -2.015906000 | 0.680142000  |
| C | -2.541893000 | -2.945926000 | 1.574296000  |
| C | 6.016696000  | -2.168701000 | -0.362433000 |
| H | 6.543316000  | -1.297994000 | 0.012813000  |
| C | 0.546683000  | -1.582694000 | -1.943185000 |
| H | 0.038607000  | -0.639244000 | -1.830541000 |
| C | 1.868780000  | -4.037497000 | -2.199124000 |
| C | -0.089484000 | -2.631750000 | -2.621705000 |
| C | -3.914681000 | -3.108406000 | 1.191871000  |
| C | 4.578067000  | -4.356131000 | -1.368304000 |
| C | 0.573721000  | -3.858232000 | -2.703162000 |
| H | 0.098129000  | -4.703841000 | -3.191708000 |
| C | 0.089449000  | -2.631774000 | 2.621780000  |
| C | 6.674645000  | -3.400759000 | -0.514969000 |
| C | 5.935148000  | -4.475335000 | -1.015310000 |
| H | 6.404296000  | -5.442631000 | -1.157828000 |
| C | -6.016690000 | -2.168702000 | 0.362407000  |
| H | -6.543302000 | -1.297991000 | -0.012842000 |
| C | -1.868806000 | -4.037523000 | 2.199147000  |
| C | -6.674649000 | -3.400757000 | 0.514931000  |
| C | -0.573752000 | -3.858263000 | 2.703204000  |
| H | -0.098156000 | -4.703885000 | 3.191724000  |
| C | -4.578086000 | -4.356143000 | 1.368287000  |
| C | -5.935162000 | -4.475339000 | 1.015275000  |

|   |               |              |              |
|---|---------------|--------------|--------------|
| H | -6.404317000  | -5.442633000 | 1.157784000  |
| C | -8.162982000  | -3.517178000 | 0.136178000  |
| C | -8.718728000  | -4.935364000 | 0.363944000  |
| H | -9.775184000  | -4.967009000 | 0.078558000  |
| H | -8.652441000  | -5.235485000 | 1.414828000  |
| H | -8.191762000  | -5.681808000 | -0.239458000 |
| C | -8.340239000  | -3.164728000 | -1.359844000 |
| H | -7.771044000  | -3.852514000 | -1.993839000 |
| H | -8.001085000  | -2.148711000 | -1.580729000 |
| H | -9.396125000  | -3.234177000 | -1.645153000 |
| C | -8.989250000  | -2.530898000 | 0.995376000  |
| H | -8.668680000  | -1.495738000 | 0.848217000  |
| H | -8.889786000  | -2.762695000 | 2.060815000  |
| H | -10.051165000 | -2.593164000 | 0.731462000  |
| C | 1.469986000   | -2.472473000 | 3.288784000  |
| C | 1.336304000   | -2.762337000 | 4.803446000  |
| H | 2.308885000   | -2.655817000 | 5.297179000  |
| H | 0.975626000   | -3.777034000 | 4.995230000  |
| H | 0.636904000   | -2.064949000 | 5.276377000  |
| C | 2.468668000   | -3.473840000 | 2.663127000  |
| H | 3.453590000   | -3.371788000 | 3.132445000  |
| H | 2.584447000   | -3.296650000 | 1.590335000  |
| H | 2.143189000   | -4.509743000 | 2.797389000  |
| C | 2.042651000   | -1.052523000 | 3.127335000  |
| H | 2.197096000   | -0.795979000 | 2.075879000  |
| H | 3.014409000   | -0.989918000 | 3.627576000  |
| H | 1.389635000   | -0.297177000 | 3.577409000  |
| C | 8.162982000   | -3.517193000 | -0.136235000 |
| C | 8.718704000   | -4.935386000 | -0.364012000 |
| H | 9.775161000   | -4.967050000 | -0.078631000 |
| H | 8.652406000   | -5.235499000 | -1.414898000 |
| H | 8.191728000   | -5.681825000 | 0.239388000  |

|   |              |              |              |
|---|--------------|--------------|--------------|
| C | 8.340265000  | -3.164749000 | 1.359785000  |
| H | 7.771071000  | -3.852530000 | 1.993786000  |
| H | 8.001127000  | -2.148729000 | 1.580677000  |
| H | 9.396155000  | -3.234212000 | 1.645079000  |
| C | 8.989253000  | -2.530923000 | -0.995444000 |
| H | 8.668695000  | -1.495760000 | -0.848288000 |
| H | 8.889777000  | -2.762725000 | -2.060881000 |
| H | 10.051169000 | -2.593198000 | -0.731538000 |
| C | -1.470002000 | -2.472437000 | -3.288740000 |
| C | -1.336302000 | -2.762487000 | -4.803367000 |
| H | -2.308879000 | -2.656034000 | -5.297119000 |
| H | -0.975618000 | -3.777210000 | -4.995013000 |
| H | -0.636899000 | -2.065157000 | -5.276380000 |
| C | -2.468758000 | -3.473665000 | -2.662985000 |
| H | -3.453691000 | -3.371549000 | -3.132267000 |
| H | -2.584480000 | -3.296398000 | -1.590199000 |
| H | -2.143392000 | -4.509610000 | -2.797188000 |
| C | -2.042579000 | -1.052432000 | -3.127465000 |
| H | -1.389581000 | -0.297186000 | -3.577732000 |
| H | -2.196899000 | -0.795713000 | -2.076033000 |
| H | -3.014389000 | -0.989871000 | -3.627611000 |
| C | -3.841525000 | -5.453724000 | 1.929930000  |
| C | -2.553007000 | -5.295658000 | 2.335049000  |
| C | 2.552976000  | -5.295632000 | -2.335049000 |
| C | 3.841496000  | -5.453705000 | -1.929946000 |
| H | 2.012217000  | -6.123880000 | -2.785435000 |
| H | 4.344277000  | -6.410037000 | -2.047854000 |
| H | -4.344311000 | -6.410054000 | 2.047825000  |
| H | -2.012256000 | -6.123909000 | 2.785438000  |
| C | 5.026260000  | 3.265044000  | 0.261105000  |
| C | 5.846263000  | 2.789251000  | 1.296018000  |
| C | 5.528824000  | 4.256285000  | -0.594501000 |

|   |              |             |              |
|---|--------------|-------------|--------------|
| C | 7.125547000  | 3.309382000 | 1.482933000  |
| H | 5.478118000  | 2.006033000 | 1.949249000  |
| C | 6.812519000  | 4.768415000 | -0.412430000 |
| H | 4.912339000  | 4.623024000 | -1.408141000 |
| C | 7.613595000  | 4.300537000 | 0.629765000  |
| H | 7.744042000  | 2.934919000 | 2.293504000  |
| H | 7.186538000  | 5.532158000 | -1.088030000 |
| H | 8.612879000  | 4.701333000 | 0.773036000  |
| C | 2.540813000  | 4.965012000 | 0.159769000  |
| C | 2.954602000  | 5.558281000 | 1.361630000  |
| C | 2.135271000  | 5.796779000 | -0.895993000 |
| C | 2.969958000  | 6.945435000 | 1.501128000  |
| H | 3.272106000  | 4.925800000 | 2.184494000  |
| C | 2.151546000  | 7.184736000 | -0.756217000 |
| H | 1.813269000  | 5.351442000 | -1.833213000 |
| C | 2.569383000  | 7.763040000 | 0.443100000  |
| H | 3.295766000  | 7.387416000 | 2.438205000  |
| H | 1.838633000  | 7.812455000 | -1.585317000 |
| H | 2.582847000  | 8.843436000 | 0.552430000  |
| C | -2.540821000 | 4.964987000 | -0.159709000 |
| C | -2.135244000 | 5.796755000 | 0.896036000  |
| C | -2.954676000 | 5.558235000 | -1.361557000 |
| C | -2.151544000 | 7.184712000 | 0.756252000  |
| H | -1.813194000 | 5.351424000 | 1.833243000  |
| C | -2.970046000 | 6.945388000 | -1.501063000 |
| H | -3.272200000 | 4.925744000 | -2.184404000 |
| C | -2.569439000 | 7.763001000 | -0.443051000 |
| H | -1.838609000 | 7.812442000 | 1.585335000  |
| H | -3.295880000 | 7.387361000 | -2.438134000 |
| H | -2.582917000 | 8.843396000 | -0.552385000 |
| C | -5.026245000 | 3.265026000 | -0.261112000 |
| C | -5.846091000 | 2.789434000 | -1.296244000 |

|   |              |             |              |
|---|--------------|-------------|--------------|
| C | -5.528911000 | 4.256115000 | 0.594608000  |
| C | -7.125360000 | 3.309582000 | -1.483220000 |
| H | -5.477856000 | 2.006348000 | -1.949573000 |
| C | -6.812591000 | 4.768261000 | 0.412468000  |
| H | -4.912534000 | 4.622704000 | 1.408395000  |
| C | -7.613522000 | 4.300566000 | -0.629918000 |
| H | -7.743750000 | 2.935280000 | -2.293943000 |
| H | -7.186715000 | 5.531864000 | 1.088166000  |
| H | -8.612792000 | 4.701382000 | -0.773246000 |

**(M)-HELI-2:**

|   |              |              |              |
|---|--------------|--------------|--------------|
| N | -2.308531000 | 0.688143000  | -0.438686000 |
| N | 0.000002000  | 0.718124000  | 0.000093000  |
| N | 4.534723000  | 0.413950000  | 0.148486000  |
| N | -4.534711000 | 0.413875000  | -0.148406000 |
| N | 2.308541000  | 0.688201000  | 0.438827000  |
| C | -1.130595000 | 1.392835000  | -0.185402000 |
| C | 1.130587000  | 1.392858000  | 0.185561000  |
| C | -2.589452000 | -0.653268000 | -0.754621000 |
| C | 1.834434000  | -1.707988000 | 1.397805000  |
| C | -3.963641000 | -0.772497000 | -0.516347000 |
| C | 2.589484000  | -0.653213000 | 0.754736000  |
| C | -1.223234000 | 2.811747000  | -0.081673000 |
| C | 1.223200000  | 2.811774000  | 0.081782000  |
| C | -2.541805000 | -2.945932000 | -1.574264000 |
| C | 3.963670000  | -0.772429000 | 0.516422000  |
| C | -4.666611000 | -2.015978000 | -0.680002000 |
| C | -0.000023000 | 3.487334000  | 0.000055000  |
| H | -0.000029000 | 4.568790000  | 0.000068000  |
| C | -1.834389000 | -1.708040000 | -1.397693000 |
| C | 3.548008000  | 1.287368000  | 0.126015000  |
| C | -2.513532000 | 3.478268000  | 0.012126000  |

|   |              |              |              |
|---|--------------|--------------|--------------|
| C | 2.513490000  | 3.478302000  | -0.012057000 |
| C | -3.914576000 | -3.108447000 | -1.191795000 |
| C | 3.655230000  | 2.710890000  | -0.069769000 |
| C | -3.548006000 | 1.287302000  | -0.125906000 |
| C | -3.655264000 | 2.710835000  | 0.069840000  |
| C | 0.546690000  | -1.582646000 | 1.943356000  |
| H | 0.038627000  | -0.639185000 | 1.830731000  |
| C | 4.666625000  | -2.015928000 | 0.680007000  |
| C | 2.541832000  | -2.945905000 | 1.574283000  |
| C | -6.016568000 | -2.168809000 | -0.362216000 |
| H | -6.543185000 | -1.298116000 | 0.013068000  |
| C | -0.546596000 | -1.582716000 | -1.943138000 |
| H | -0.038512000 | -0.639277000 | -1.830428000 |
| C | -1.868726000 | -4.037498000 | -2.199183000 |
| C | 0.089529000  | -2.631728000 | -2.621768000 |
| C | 3.914585000  | -3.108415000 | 1.191754000  |
| C | -4.577968000 | -4.356185000 | -1.368240000 |
| C | -0.573691000 | -3.858203000 | -2.703270000 |
| H | -0.098106000 | -4.703797000 | -3.191847000 |
| C | -0.089432000 | -2.631680000 | 2.621957000  |
| C | -6.674513000 | -3.400868000 | -0.514762000 |
| C | -5.935030000 | -4.475418000 | -1.015178000 |
| H | -6.404173000 | -5.442714000 | -1.157706000 |
| C | 6.016571000  | -2.168768000 | 0.362171000  |
| H | 6.543196000  | -1.298061000 | -0.013070000 |
| C | 1.868753000  | -4.037489000 | 2.199169000  |
| C | 6.674495000  | -3.400848000 | 0.514617000  |
| C | 0.573748000  | -3.858184000 | 2.703334000  |
| H | 0.098162000  | -4.703793000 | 3.191885000  |
| C | 4.577959000  | -4.356178000 | 1.368101000  |
| C | 5.935006000  | -4.475417000 | 1.014990000  |
| H | 6.404134000  | -5.442731000 | 1.157446000  |

|   |              |              |              |
|---|--------------|--------------|--------------|
| C | 8.162804000  | -3.517307000 | 0.135776000  |
| C | 8.718535000  | -4.935499000 | 0.363540000  |
| H | 9.774946000  | -4.967198000 | 0.077994000  |
| H | 8.652403000  | -5.235556000 | 1.414452000  |
| H | 8.191445000  | -5.681958000 | -0.239736000 |
| C | 8.339988000  | -3.164897000 | -1.360263000 |
| H | 7.770725000  | -3.852671000 | -1.994210000 |
| H | 8.000873000  | -2.148869000 | -1.581153000 |
| H | 9.395855000  | -3.234402000 | -1.645629000 |
| C | 8.989135000  | -2.531021000 | 0.994907000  |
| H | 8.668560000  | -1.495862000 | 0.847750000  |
| H | 8.889731000  | -2.762798000 | 2.060356000  |
| H | 10.051034000 | -2.593299000 | 0.730931000  |
| C | -1.469932000 | -2.472373000 | 3.289049000  |
| C | -1.336179000 | -2.762321000 | 4.803691000  |
| H | -2.308749000 | -2.655870000 | 5.297462000  |
| H | -0.975454000 | -3.777016000 | 4.995398000  |
| H | -0.636793000 | -2.064928000 | 5.276634000  |
| C | -2.468677000 | -3.473671000 | 2.663393000  |
| H | -3.453583000 | -3.371601000 | 3.132741000  |
| H | -2.584482000 | -3.296442000 | 1.590608000  |
| H | -2.143240000 | -4.509592000 | 2.797604000  |
| C | -2.042574000 | -1.052398000 | 3.127726000  |
| H | -2.197005000 | -0.795757000 | 2.076291000  |
| H | -3.014340000 | -0.989830000 | 3.627958000  |
| H | -1.389552000 | -0.297105000 | 3.577876000  |
| C | -8.162835000 | -3.517321000 | -0.135970000 |
| C | -8.718566000 | -4.935509000 | -0.363758000 |
| H | -9.774992000 | -4.967198000 | -0.078266000 |
| H | -8.652382000 | -5.235569000 | -1.414666000 |
| H | -8.191515000 | -5.681973000 | 0.239547000  |
| C | -8.340062000 | -3.164919000 | 1.360066000  |

|   |               |              |              |
|---|---------------|--------------|--------------|
| H | -7.770823000  | -3.852701000 | 1.994026000  |
| H | -8.000944000  | -2.148895000 | 1.580971000  |
| H | -9.395938000  | -3.234417000 | 1.645402000  |
| C | -8.989138000  | -2.531028000 | -0.995120000 |
| H | -8.668567000  | -1.495870000 | -0.847948000 |
| H | -8.889701000  | -2.762800000 | -2.060568000 |
| H | -10.051045000 | -2.593307000 | -0.731179000 |
| C | 1.470079000   | -2.472446000 | -3.288762000 |
| C | 1.336371000   | -2.762138000 | -4.803458000 |
| H | 2.308977000   | -2.655730000 | -5.297166000 |
| H | 0.975528000   | -3.776758000 | -4.995338000 |
| H | 0.637093000   | -2.064587000 | -5.276327000 |
| C | 2.468689000   | -3.473951000 | -2.663222000 |
| H | 3.453628000   | -3.371894000 | -3.132500000 |
| H | 2.584453000   | -3.296918000 | -1.590401000 |
| H | 2.143161000   | -4.509819000 | -2.797631000 |
| C | 2.042861000   | -1.052559000 | -3.127172000 |
| H | 1.389948000   | -0.297118000 | -3.577233000 |
| H | 2.197259000   | -0.796116000 | -2.075687000 |
| H | 3.014661000   | -0.990009000 | -3.627341000 |
| C | 3.841405000   | -5.453741000 | 1.929786000  |
| C | 2.552927000   | -5.295643000 | 2.335008000  |
| C | -2.552923000  | -5.295630000 | -2.335130000 |
| C | -3.841420000  | -5.453729000 | -1.929969000 |
| H | -2.012184000  | -6.123853000 | -2.785585000 |
| H | -4.344204000  | -6.410055000 | -2.047903000 |
| H | 4.344172000   | -6.410086000 | 2.047640000  |
| H | 2.012191000   | -6.123885000 | 2.785430000  |
| C | -5.026311000  | 3.265034000  | 0.260750000  |
| C | -5.846431000  | 2.789260000  | 1.295599000  |
| C | -5.528774000  | 4.256266000  | -0.594919000 |
| C | -7.125727000  | 3.309404000  | 1.482365000  |

|   |              |             |              |
|---|--------------|-------------|--------------|
| H | -5.478363000 | 2.006048000 | 1.948867000  |
| C | -6.812494000 | 4.768392000 | -0.413002000 |
| H | -4.912195000 | 4.623012000 | -1.408484000 |
| C | -7.613681000 | 4.300536000 | 0.629109000  |
| H | -7.744316000 | 2.934972000 | 2.292876000  |
| H | -7.186442000 | 5.532114000 | -1.088665000 |
| H | -8.612981000 | 4.701338000 | 0.772260000  |
| C | -2.540876000 | 4.965025000 | 0.159478000  |
| C | -2.954799000 | 5.558338000 | 1.361272000  |
| C | -2.135201000 | 5.796758000 | -0.896267000 |
| C | -2.970170000 | 6.945497000 | 1.500716000  |
| H | -3.272393000 | 4.925889000 | 2.184124000  |
| C | -2.151499000 | 7.184716000 | -0.756544000 |
| H | -1.813076000 | 5.351387000 | -1.833428000 |
| C | -2.569485000 | 7.763065000 | 0.442702000  |
| H | -3.296073000 | 7.387508000 | 2.437745000  |
| H | -1.838486000 | 7.812406000 | -1.585627000 |
| H | -2.582959000 | 8.843464000 | 0.551989000  |
| C | 2.540818000  | 4.965059000 | -0.159466000 |
| C | 2.135117000  | 5.796819000 | 0.896242000  |
| C | 2.954784000  | 5.558323000 | -1.361267000 |
| C | 2.151410000  | 7.184774000 | 0.756467000  |
| H | 1.812965000  | 5.351476000 | 1.833408000  |
| C | 2.970153000  | 6.945479000 | -1.500761000 |
| H | 3.272420000  | 4.925842000 | -2.184079000 |
| C | 2.569426000  | 7.763080000 | -0.442789000 |
| H | 1.838376000  | 7.812493000 | 1.585520000  |
| H | 3.296090000  | 7.387459000 | -2.437793000 |
| H | 2.582902000  | 8.843476000 | -0.552113000 |
| C | 5.026255000  | 3.265110000 | -0.260797000 |
| C | 5.846279000  | 2.789352000 | -1.295720000 |
| C | 5.528773000  | 4.256347000 | 0.594835000  |

|   |             |             |              |
|---|-------------|-------------|--------------|
| C | 7.125552000 | 3.309516000 | -1.482602000 |
| H | 5.478165000 | 2.006134000 | -1.948958000 |
| C | 6.812467000 | 4.768500000 | 0.412797000  |
| H | 4.912261000 | 4.623071000 | 1.408460000  |
| C | 7.613563000 | 4.300657000 | -0.629390000 |
| H | 7.744075000 | 2.935095000 | -2.293168000 |
| H | 7.186467000 | 5.532225000 | 1.088427000  |
| H | 8.612845000 | 4.701472000 | -0.772632000 |

### HELI-3:

|   |              |              |              |
|---|--------------|--------------|--------------|
| N | 0.024052000  | 0.706194000  | 0.158360000  |
| N | -4.493996000 | 0.754395000  | -0.448208000 |
| N | -2.320605000 | 0.817835000  | 0.172656000  |
| N | 4.492504000  | 0.071751000  | 0.761708000  |
| N | 2.362445000  | 0.503997000  | 0.142401000  |
| C | -4.275656000 | -2.902584000 | 0.275203000  |
| C | -4.065732000 | -0.505315000 | -0.126779000 |
| C | -1.074868000 | 1.451416000  | 0.170295000  |
| C | 1.212920000  | 1.295047000  | 0.212190000  |
| C | 1.384267000  | 2.696656000  | 0.399430000  |
| C | -2.151647000 | -1.702876000 | 0.903397000  |
| C | 2.595505000  | -0.855228000 | -0.146264000 |
| C | -2.955480000 | -2.899634000 | 0.842114000  |
| C | -4.867222000 | -1.696276000 | -0.199031000 |
| C | -3.452596000 | 1.541895000  | -0.243164000 |
| C | 3.905204000  | -1.070551000 | 0.290297000  |
| C | 2.499920000  | -3.156963000 | -0.966914000 |
| C | 3.572780000  | 1.014844000  | 0.646204000  |
| C | -1.054433000 | 2.876195000  | 0.128952000  |

|   |              |              |              |
|---|--------------|--------------|--------------|
| C | -6.169342000 | -1.699882000 | -0.711904000 |
| H | -6.597983000 | -0.767146000 | -1.062014000 |
| C | -2.736978000 | -0.523012000 | 0.305051000  |
| C | 1.866968000  | -1.863243000 | -0.884126000 |
| C | -2.444008000 | -4.116854000 | 1.392883000  |
| C | 4.536473000  | -2.360177000 | 0.219532000  |
| C | 3.796603000  | -3.408089000 | -0.401087000 |
| C | 0.210111000  | 3.453734000  | 0.300011000  |
| H | 0.283189000  | 4.529967000  | 0.358863000  |
| C | 1.838404000  | -4.217251000 | -1.662920000 |
| C | 0.661556000  | -1.666648000 | -1.575068000 |
| H | 0.187686000  | -0.698022000 | -1.546889000 |
| C | -6.338182000 | -4.080496000 | -0.321027000 |
| H | -6.908874000 | -5.003927000 | -0.366078000 |
| C | -2.264097000 | 3.649659000  | -0.110712000 |
| C | -3.435119000 | 2.975862000  | -0.355717000 |
| C | 3.745209000  | 2.417949000  | 0.916718000  |
| C | 0.612357000  | -3.973523000 | -2.305109000 |
| H | 0.121386000  | -4.784978000 | -2.834818000 |
| C | -6.895712000 | -2.889806000 | -0.777311000 |
| H | -7.902549000 | -2.885026000 | -1.183981000 |
| C | -4.752808000 | 3.623168000  | -0.729469000 |
| H | -4.581174000 | 4.634194000  | -1.106873000 |
| H | -5.180917000 | 3.048105000  | -1.556883000 |
| C | -2.170034000 | 5.159855000  | -0.180640000 |
| H | -3.137375000 | 5.601333000  | 0.067594000  |
| H | -1.481277000 | 5.525067000  | 0.589596000  |
| C | 4.387454000  | -4.707264000 | -0.488992000 |

|   |              |              |              |
|---|--------------|--------------|--------------|
| C | -5.038375000 | -4.110729000 | 0.216238000  |
| C | 5.668794000  | -4.920115000 | 0.051472000  |
| H | 6.108704000  | -5.911360000 | -0.014965000 |
| C | -1.195442000 | -4.121858000 | 2.037666000  |
| H | -0.819142000 | -5.050828000 | 2.456554000  |
| C | -4.461875000 | -5.321971000 | 0.727925000  |
| H | -5.042379000 | -6.238393000 | 0.668094000  |
| C | -3.226990000 | -5.319314000 | 1.297243000  |
| H | -2.805462000 | -6.235045000 | 1.702710000  |
| C | 5.815885000  | -2.603826000 | 0.731596000  |
| H | 6.360001000  | -1.787748000 | 1.194578000  |
| C | 2.682428000  | 3.267741000  | 0.725475000  |
| C | -0.464563000 | -2.947730000 | 2.152058000  |
| H | 0.487657000  | -2.949225000 | 2.673909000  |
| C | -0.930042000 | -1.757779000 | 1.591622000  |
| H | -0.328205000 | -0.866252000 | 1.672452000  |
| C | 0.049310000  | -2.705409000 | -2.276913000 |
| H | -0.884941000 | -2.514401000 | -2.796281000 |
| C | 6.373208000  | -3.880940000 | 0.652086000  |
| H | 7.363357000  | -4.063195000 | 1.058948000  |
| C | -1.719828000 | 5.691144000  | -1.559331000 |
| H | -2.439173000 | 5.361105000  | -2.318694000 |
| H | -0.760116000 | 5.237160000  | -1.833821000 |
| C | -5.798318000 | 3.667096000  | 0.410048000  |
| H | -5.989495000 | 2.643121000  | 0.746538000  |
| H | -6.739113000 | 4.034139000  | -0.018278000 |
| C | 5.119944000  | 2.844707000  | 1.395243000  |
| H | 5.008569000  | 3.552622000  | 2.223628000  |

|   |              |              |              |
|---|--------------|--------------|--------------|
| H | 5.618514000  | 1.961269000  | 1.801240000  |
| C | 3.662146000  | -5.757571000 | -1.146559000 |
| H | 4.112075000  | -6.745151000 | -1.198061000 |
| C | 2.449587000  | -5.517874000 | -1.713532000 |
| H | 1.915906000  | -6.311639000 | -2.229032000 |
| C | 6.037958000  | 3.479358000  | 0.325388000  |
| H | 6.979886000  | 3.745392000  | 0.821092000  |
| H | 5.602290000  | 4.423162000  | -0.022227000 |
| C | 6.333262000  | 2.580422000  | -0.878249000 |
| H | 5.420827000  | 2.345663000  | -1.436191000 |
| H | 7.026942000  | 3.072564000  | -1.567762000 |
| H | 6.780411000  | 1.632002000  | -0.564807000 |
| C | 2.801265000  | 4.766924000  | 0.892836000  |
| H | 1.962265000  | 5.141363000  | 1.492747000  |
| H | 3.701465000  | 5.003906000  | 1.465216000  |
| C | -1.599243000 | 7.217031000  | -1.585834000 |
| H | -2.554399000 | 7.693520000  | -1.338244000 |
| H | -0.855589000 | 7.569021000  | -0.861902000 |
| H | -1.295570000 | 7.571917000  | -2.575651000 |
| C | 2.850768000  | 5.545509000  | -0.441573000 |
| H | 1.957812000  | 5.322268000  | -1.037145000 |
| H | 3.702055000  | 5.187456000  | -1.032029000 |
| C | -5.409214000 | 4.543954000  | 1.603364000  |
| H | -6.183079000 | 4.511947000  | 2.377236000  |
| H | -4.471454000 | 4.209604000  | 2.059654000  |
| H | -5.282967000 | 5.591672000  | 1.307281000  |
| C | 2.963067000  | 7.057282000  | -0.228472000 |
| H | 2.105810000  | 7.443125000  | 0.334808000  |

|   |             |             |              |
|---|-------------|-------------|--------------|
| H | 3.869724000 | 7.312503000 | 0.331317000  |
| H | 3.000601000 | 7.587975000 | -1.184901000 |

**Protonated HELI-2**

|   |              |              |              |
|---|--------------|--------------|--------------|
| 7 | 2.312707000  | 0.702911000  | -0.400574000 |
| 7 | 0.000000000  | 0.742838000  | 0.000002000  |
| 7 | -4.467189000 | 0.410800000  | 0.129130000  |
| 7 | 4.467188000  | 0.410803000  | -0.129127000 |
| 7 | -2.312708000 | 0.702911000  | 0.400575000  |
| 6 | 1.125416000  | 1.419984000  | -0.176676000 |
| 6 | -1.125417000 | 1.419984000  | 0.176674000  |
| 6 | 2.590907000  | -0.647557000 | -0.751140000 |
| 6 | -1.823780000 | -1.682856000 | 1.408451000  |
| 6 | 3.953438000  | -0.811299000 | -0.515616000 |
| 6 | -2.590907000 | -0.647555000 | 0.751148000  |
| 6 | 1.222399000  | 2.840772000  | -0.083039000 |
| 6 | -1.222401000 | 2.840772000  | 0.083022000  |
| 6 | 2.522856000  | -2.925347000 | -1.588772000 |
| 6 | -3.953438000 | -0.811299000 | 0.515629000  |
| 6 | 4.663880000  | -2.039281000 | -0.674375000 |
| 6 | -0.000002000 | 3.519600000  | -0.000012000 |
| 1 | -0.000002000 | 4.601491000  | -0.000019000 |
| 6 | 1.823783000  | -1.682862000 | -1.408438000 |
| 6 | -3.495509000 | 1.337091000  | 0.091136000  |
| 6 | 2.506274000  | 3.517571000  | 0.013447000  |
| 6 | -2.506278000 | 3.517569000  | -0.013471000 |
| 6 | 3.888934000  | -3.111405000 | -1.202083000 |
| 6 | -3.644305000 | 2.738518000  | -0.108803000 |
| 6 | 3.495508000  | 1.337094000  | -0.091142000 |

|   |              |              |              |
|---|--------------|--------------|--------------|
| 6 | 3.644303000  | 2.738523000  | 0.108785000  |
| 6 | -0.547328000 | -1.527776000 | 1.971618000  |
| 1 | -0.054883000 | -0.574800000 | 1.873753000  |
| 6 | -4.663879000 | -2.039279000 | 0.674397000  |
| 6 | -2.522853000 | -2.925340000 | 1.588794000  |
| 6 | 6.011216000  | -2.217719000 | -0.347607000 |
| 1 | 6.578110000  | -1.385959000 | 0.060571000  |
| 6 | 0.547332000  | -1.527785000 | -1.971609000 |
| 1 | 0.054886000  | -0.574810000 | -1.873750000 |
| 6 | 1.841704000  | -4.001722000 | -2.232067000 |
| 6 | -0.091417000 | -2.559225000 | -2.672619000 |
| 6 | -3.888932000 | -3.111400000 | 1.202111000  |
| 6 | 4.535559000  | -4.365669000 | -1.391069000 |
| 6 | 0.556961000  | -3.795135000 | -2.749941000 |
| 1 | 0.077700000  | -4.627128000 | -3.256331000 |
| 6 | 0.091424000  | -2.559213000 | 2.672630000  |
| 6 | 6.651141000  | -3.456217000 | -0.515173000 |
| 6 | 5.889027000  | -4.506964000 | -1.035497000 |
| 1 | 6.345930000  | -5.477438000 | -1.189374000 |
| 6 | -6.011216000 | -2.217720000 | 0.347635000  |
| 1 | -6.578112000 | -1.385962000 | -0.060545000 |
| 6 | -1.841698000 | -4.001711000 | 2.232092000  |
| 6 | -6.651140000 | -3.456218000 | 0.515211000  |
| 6 | -0.556953000 | -3.795123000 | 2.749959000  |
| 1 | -0.077690000 | -4.627113000 | 3.256351000  |
| 6 | -4.535556000 | -4.365664000 | 1.391105000  |
| 6 | -5.889025000 | -4.506961000 | 1.035538000  |
| 1 | -6.345927000 | -5.477434000 | 1.189422000  |

|   |               |              |              |
|---|---------------|--------------|--------------|
| 6 | -8.134443000  | -3.609814000 | 0.131256000  |
| 6 | -8.659121000  | -5.034349000 | 0.391434000  |
| 1 | -9.712385000  | -5.092738000 | 0.103583000  |
| 1 | -8.594943000  | -5.308403000 | 1.449254000  |
| 1 | -8.119026000  | -5.784391000 | -0.195208000 |
| 6 | -8.306176000  | -3.296555000 | -1.374664000 |
| 1 | -7.718350000  | -3.984115000 | -1.990890000 |
| 1 | -7.998415000  | -2.275341000 | -1.621869000 |
| 1 | -9.357113000  | -3.400712000 | -1.661537000 |
| 6 | -8.982816000  | -2.620023000 | 0.965510000  |
| 1 | -8.697204000  | -1.578280000 | 0.787162000  |
| 1 | -8.881305000  | -2.818009000 | 2.037036000  |
| 1 | -10.040437000 | -2.719270000 | 0.702450000  |
| 6 | 1.451373000   | -2.374506000 | 3.372386000  |
| 6 | 1.281740000   | -2.646999000 | 4.887094000  |
| 1 | 2.239202000   | -2.520738000 | 5.402925000  |
| 1 | 0.934133000   | -3.664727000 | 5.083131000  |
| 1 | 0.561132000   | -1.955431000 | 5.334892000  |
| 6 | 2.477398000   | -3.370862000 | 2.783286000  |
| 1 | 3.446769000   | -3.251300000 | 3.278424000  |
| 1 | 2.618284000   | -3.207978000 | 1.710211000  |
| 1 | 2.165028000   | -4.409200000 | 2.923678000  |
| 6 | 2.007663000   | -0.948272000 | 3.207614000  |
| 1 | 2.181299000   | -0.702045000 | 2.154666000  |
| 1 | 2.965685000   | -0.868058000 | 3.729984000  |
| 1 | 1.337471000   | -0.195471000 | 3.636010000  |
| 6 | 8.134442000   | -3.609812000 | -0.131212000 |
| 6 | 8.659119000   | -5.034351000 | -0.391371000 |

|   |              |              |              |
|---|--------------|--------------|--------------|
| 1 | 9.712382000  | -5.092737000 | -0.103518000 |
| 1 | 8.594941000  | -5.308418000 | -1.449187000 |
| 1 | 8.119022000  | -5.784384000 | 0.195281000  |
| 6 | 8.306169000  | -3.296535000 | 1.374704000  |
| 1 | 7.718340000  | -3.984086000 | 1.990937000  |
| 1 | 7.998408000  | -2.275317000 | 1.621896000  |
| 1 | 9.357105000  | -3.400689000 | 1.661583000  |
| 6 | 8.982820000  | -2.620032000 | -0.965475000 |
| 1 | 8.697209000  | -1.578286000 | -0.787140000 |
| 1 | 8.881312000  | -2.818031000 | -2.036999000 |
| 1 | 10.040439000 | -2.719278000 | -0.702409000 |
| 6 | -1.451363000 | -2.374522000 | -3.372382000 |
| 6 | -1.281726000 | -2.647028000 | -4.887087000 |
| 1 | -2.239188000 | -2.520772000 | -5.402920000 |
| 1 | -0.934119000 | -3.664758000 | -5.083115000 |
| 1 | -0.561117000 | -1.955464000 | -5.334890000 |
| 6 | -2.477392000 | -3.370871000 | -2.783276000 |
| 1 | -3.446761000 | -3.251312000 | -3.278419000 |
| 1 | -2.618283000 | -3.207975000 | -1.710203000 |
| 1 | -2.165022000 | -4.409210000 | -2.923656000 |
| 6 | -2.007650000 | -0.948285000 | -3.207624000 |
| 1 | -1.337456000 | -0.195490000 | -3.636027000 |
| 1 | -2.181285000 | -0.702046000 | -2.154679000 |
| 1 | -2.965671000 | -0.868073000 | -3.729994000 |
| 6 | -3.789647000 | -5.448922000 | 1.968020000  |
| 6 | -2.506717000 | -5.268783000 | 2.378759000  |
| 6 | 2.506724000  | -5.268794000 | -2.378725000 |
| 6 | 3.789653000  | -5.448931000 | -1.967981000 |

|   |              |              |              |
|---|--------------|--------------|--------------|
| 1 | 1.959416000  | -6.082803000 | -2.844504000 |
| 1 | 4.281073000  | -6.408686000 | -2.094890000 |
| 1 | -4.281067000 | -6.408677000 | 2.094935000  |
| 1 | -1.959407000 | -6.082790000 | 2.844539000  |
| 6 | 5.035968000  | 3.242586000  | 0.299788000  |
| 6 | 5.789467000  | 2.824140000  | 1.410809000  |
| 6 | 5.622458000  | 4.101347000  | -0.642653000 |
| 6 | 7.103014000  | 3.266475000  | 1.577954000  |
| 1 | 5.337486000  | 2.181897000  | 2.162820000  |
| 6 | 6.935324000  | 4.536406000  | -0.471883000 |
| 1 | 5.050841000  | 4.426420000  | -1.505559000 |
| 6 | 7.677578000  | 4.121041000  | 0.636091000  |
| 1 | 7.671061000  | 2.950750000  | 2.447233000  |
| 1 | 7.380279000  | 5.199347000  | -1.206874000 |
| 1 | 8.698703000  | 4.464687000  | 0.765825000  |
| 6 | 2.556407000  | 5.002150000  | 0.098774000  |
| 6 | 3.059715000  | 5.635448000  | 1.246085000  |
| 6 | 2.106108000  | 5.787854000  | -0.976100000 |
| 6 | 3.108973000  | 7.026422000  | 1.315788000  |
| 1 | 3.408995000  | 5.038902000  | 2.082521000  |
| 6 | 2.169394000  | 7.179157000  | -0.905905000 |
| 1 | 1.728936000  | 5.309814000  | -1.875970000 |
| 6 | 2.668380000  | 7.800416000  | 0.240292000  |
| 1 | 3.495405000  | 7.505659000  | 2.209599000  |
| 1 | 1.833790000  | 7.775729000  | -1.748117000 |
| 1 | 2.716811000  | 8.883298000  | 0.294196000  |
| 6 | -2.556413000 | 5.002146000  | -0.098815000 |
| 6 | -2.106123000 | 5.787863000  | 0.976053000  |

|   |              |             |              |
|---|--------------|-------------|--------------|
| 6 | -3.059716000 | 5.635431000 | -1.246136000 |
| 6 | -2.169412000 | 7.179165000 | 0.905843000  |
| 1 | -1.728956000 | 5.309834000 | 1.875931000  |
| 6 | -3.108977000 | 7.026404000 | -1.315854000 |
| 1 | -3.408990000 | 5.038875000 | -2.082568000 |
| 6 | -2.668393000 | 7.800410000 | -0.240364000 |
| 1 | -1.833815000 | 7.775747000 | 1.748051000  |
| 1 | -3.495405000 | 7.505630000 | -2.209673000 |
| 1 | -2.716826000 | 8.883292000 | -0.294279000 |
| 6 | -5.035970000 | 3.242577000 | -0.299813000 |
| 6 | -5.789467000 | 2.824120000 | -1.410833000 |
| 6 | -5.622464000 | 4.101344000 | 0.642619000  |
| 6 | -7.103015000 | 3.266452000 | -1.577983000 |
| 1 | -5.337484000 | 2.181873000 | -2.162838000 |
| 6 | -6.935331000 | 4.536399000 | 0.471845000  |
| 1 | -5.050849000 | 4.426425000 | 1.505524000  |
| 6 | -7.677582000 | 4.121023000 | -0.636128000 |
| 1 | -7.671060000 | 2.950718000 | -2.447260000 |
| 1 | -7.380289000 | 5.199344000 | 1.206829000  |
| 1 | -8.698708000 | 4.464666000 | -0.765866000 |
| 1 | 5.441488000  | 0.640825000 | 0.020823000  |
| 1 | -5.441489000 | 0.640820000 | -0.020822000 |

#### HELI-2 TS

|   |              |             |             |
|---|--------------|-------------|-------------|
| 6 | -1.001297000 | 2.881456000 | 0.597514000 |
| 6 | -1.032838000 | 1.461062000 | 0.657609000 |
| 6 | 0.263479000  | 3.470783000 | 0.660547000 |
| 6 | -2.160458000 | 3.653849000 | 0.147450000 |
| 7 | 0.053539000  | 0.687192000 | 0.760147000 |

|   |              |              |              |
|---|--------------|--------------|--------------|
| 7 | -2.272790000 | 0.865286000  | 0.353759000  |
| 6 | 1.426041000  | 2.698352000  | 0.609025000  |
| 1 | 0.345314000  | 4.546343000  | 0.575264000  |
| 6 | -3.139836000 | 2.988356000  | -0.549934000 |
| 6 | 1.244156000  | 1.288993000  | 0.662575000  |
| 6 | -3.090653000 | 1.544713000  | -0.577887000 |
| 6 | -2.651783000 | -0.480702000 | 0.272611000  |
| 7 | 2.381275000  | 0.514488000  | 0.356059000  |
| 7 | -3.823015000 | 0.713228000  | -1.293467000 |
| 6 | -3.532508000 | -0.540472000 | -0.806157000 |
| 6 | -2.620707000 | -1.527748000 | 1.261573000  |
| 6 | 3.561752000  | 2.490548000  | -0.528020000 |
| 6 | 2.546081000  | -0.873447000 | 0.252926000  |
| 6 | 3.291007000  | 1.071775000  | -0.572160000 |
| 6 | -4.068874000 | -1.796298000 | -1.264245000 |
| 6 | -3.203165000 | -2.768911000 | 0.853876000  |
| 6 | -2.329969000 | -1.318606000 | 2.619509000  |
| 6 | 3.400322000  | -1.052998000 | -0.833422000 |
| 6 | 2.361168000  | -1.920028000 | 1.227170000  |
| 7 | 3.881315000  | 0.147366000  | -1.304153000 |
| 6 | -3.836598000 | -2.923322000 | -0.422326000 |
| 6 | -4.782253000 | -1.944755000 | -2.454787000 |
| 6 | -3.267208000 | -3.835929000 | 1.795607000  |
| 6 | -2.610927000 | -2.296125000 | 3.587525000  |
| 1 | -1.986864000 | -0.337397000 | 2.923037000  |
| 6 | 3.726051000  | -2.369358000 | -1.319921000 |
| 6 | 2.732408000  | -3.231721000 | 0.789061000  |
| 6 | 2.125306000  | -1.695366000 | 2.591118000  |

|   |              |              |              |
|---|--------------|--------------|--------------|
| 6 | -4.364055000 | -4.184752000 | -0.815541000 |
| 6 | -5.261666000 | -3.197667000 | -2.878843000 |
| 1 | -4.947966000 | -1.059307000 | -3.059164000 |
| 6 | -2.976848000 | -3.573708000 | 3.143297000  |
| 6 | 3.320599000  | -3.460942000 | -0.497122000 |
| 6 | 4.396567000  | -2.606698000 | -2.520393000 |
| 6 | 2.631596000  | -4.312250000 | 1.709527000  |
| 6 | 2.260173000  | -2.725386000 | 3.540905000  |
| 1 | 1.949900000  | -0.677418000 | 2.918331000  |
| 6 | -5.039686000 | -4.298276000 | -2.045712000 |
| 1 | -3.133326000 | -4.374740000 | 3.859585000  |
| 6 | 3.632381000  | -4.782939000 | -0.920121000 |
| 6 | 4.661553000  | -3.912336000 | -2.974399000 |
| 1 | 4.699371000  | -1.747693000 | -3.109644000 |
| 6 | 2.405879000  | -4.034533000 | 3.068986000  |
| 1 | -5.414486000 | -5.277335000 | -2.322261000 |
| 6 | 4.270203000  | -4.979139000 | -2.160581000 |
| 1 | 2.435370000  | -4.866834000 | 3.763394000  |
| 1 | 4.477759000  | -6.000168000 | -2.460529000 |
| 6 | 2.691634000  | 3.290724000  | 0.172317000  |
| 6 | -2.686597000 | -1.969764000 | 5.093100000  |
| 6 | -6.012897000 | -3.307164000 | -4.219393000 |
| 6 | 2.456027000  | -2.404189000 | 5.036833000  |
| 6 | 5.372832000  | -4.114522000 | -4.325869000 |
| 6 | 2.069297000  | -3.590561000 | 5.945844000  |
| 1 | 2.741175000  | -4.443193000 | 5.811651000  |
| 1 | 2.139307000  | -3.288927000 | 6.995640000  |
| 1 | 1.048581000  | -3.936073000 | 5.761050000  |

|   |              |              |              |
|---|--------------|--------------|--------------|
| 6 | 3.967700000  | -2.118800000 | 5.240852000  |
| 1 | 4.171684000  | -1.891434000 | 6.293551000  |
| 1 | 4.573790000  | -2.984261000 | 4.954983000  |
| 1 | 4.292210000  | -1.264173000 | 4.638784000  |
| 6 | 1.671167000  | -1.153938000 | 5.477660000  |
| 1 | 2.019926000  | -0.248588000 | 4.972651000  |
| 1 | 0.603783000  | -1.261252000 | 5.279397000  |
| 1 | 1.800959000  | -0.992865000 | 6.552569000  |
| 6 | -4.168958000 | -2.099268000 | 5.530098000  |
| 1 | -4.545740000 | -3.115395000 | 5.381806000  |
| 1 | -4.270712000 | -1.852979000 | 6.593091000  |
| 1 | -4.807113000 | -1.415990000 | 4.960250000  |
| 6 | -1.842614000 | -2.961820000 | 5.919823000  |
| 1 | -0.792413000 | -2.924925000 | 5.625896000  |
| 1 | -1.906235000 | -2.717605000 | 6.985628000  |
| 1 | -2.187789000 | -3.992618000 | 5.797775000  |
| 6 | -2.238045000 | -0.529915000 | 5.408013000  |
| 1 | -2.279386000 | -0.360460000 | 6.488487000  |
| 1 | -1.215177000 | -0.328014000 | 5.079745000  |
| 1 | -2.894315000 | 0.206970000  | 4.934063000  |
| 6 | 5.576616000  | -5.602979000 | -4.665154000 |
| 1 | 6.077860000  | -5.691986000 | -5.634132000 |
| 1 | 6.201819000  | -6.109304000 | -3.922551000 |
| 1 | 4.624609000  | -6.139265000 | -4.734731000 |
| 6 | 6.761895000  | -3.434110000 | -4.282492000 |
| 1 | 6.684484000  | -2.360323000 | -4.088697000 |
| 1 | 7.388384000  | -3.873165000 | -3.498958000 |
| 1 | 7.276471000  | -3.563699000 | -5.241027000 |

|   |              |              |              |
|---|--------------|--------------|--------------|
| 6 | 4.525180000  | -3.474886000 | -5.451438000 |
| 1 | 3.537185000  | -3.943335000 | -5.511643000 |
| 1 | 4.379577000  | -2.402433000 | -5.292731000 |
| 1 | 5.021982000  | -3.604641000 | -6.419288000 |
| 6 | -6.467730000 | -4.747284000 | -4.521735000 |
| 1 | -7.158528000 | -5.125552000 | -3.761184000 |
| 1 | -6.990127000 | -4.771576000 | -5.483296000 |
| 1 | -5.620196000 | -5.437209000 | -4.588559000 |
| 6 | -5.083322000 | -2.843873000 | -5.366450000 |
| 1 | -4.757468000 | -1.808140000 | -5.233746000 |
| 1 | -4.189021000 | -3.473260000 | -5.423806000 |
| 1 | -5.606414000 | -2.908895000 | -6.326941000 |
| 6 | -7.267455000 | -2.402261000 | -4.180911000 |
| 1 | -7.949379000 | -2.712487000 | -3.382212000 |
| 1 | -7.008631000 | -1.352782000 | -4.013242000 |
| 1 | -7.807925000 | -2.464444000 | -5.131919000 |
| 6 | -3.745289000 | -5.119760000 | 1.350482000  |
| 6 | -4.243028000 | -5.293212000 | 0.094614000  |
| 6 | 3.339932000  | -5.874666000 | -0.029928000 |
| 6 | 2.888428000  | -5.647226000 | 1.235328000  |
| 1 | -3.725825000 | -5.948067000 | 2.053574000  |
| 1 | -4.613377000 | -6.264956000 | -0.220672000 |
| 1 | 3.543542000  | -6.887363000 | -0.367287000 |
| 1 | 2.740801000  | -6.475238000 | 1.923398000  |
| 6 | 2.887905000  | 4.755370000  | 0.361869000  |
| 6 | 2.850956000  | 5.299536000  | 1.657007000  |
| 6 | 3.082353000  | 5.620306000  | -0.727188000 |
| 6 | 3.026534000  | 6.668693000  | 1.859005000  |

|   |              |             |              |
|---|--------------|-------------|--------------|
| 1 | 2.694224000  | 4.642976000 | 2.507861000  |
| 6 | 3.249322000  | 6.989893000 | -0.524122000 |
| 1 | 3.098061000  | 5.216652000 | -1.733952000 |
| 6 | 3.226482000  | 7.518079000 | 0.768819000  |
| 1 | 3.005939000  | 7.070497000 | 2.867581000  |
| 1 | 3.393707000  | 7.645222000 | -1.377865000 |
| 1 | 3.359164000  | 8.584373000 | 0.925015000  |
| 6 | 4.813739000  | 2.968571000 | -1.182787000 |
| 6 | 5.016055000  | 2.790077000 | -2.560114000 |
| 6 | 5.821599000  | 3.583656000 | -0.424333000 |
| 6 | 6.192594000  | 3.232265000 | -3.165702000 |
| 1 | 4.248965000  | 2.305112000 | -3.153940000 |
| 6 | 6.999657000  | 4.019848000 | -1.030688000 |
| 1 | 5.680706000  | 3.716275000 | 0.643595000  |
| 6 | 7.187946000  | 3.848099000 | -2.403781000 |
| 1 | 6.331355000  | 3.093657000 | -4.233858000 |
| 1 | 7.771195000  | 4.490804000 | -0.428741000 |
| 1 | 8.104536000  | 4.188886000 | -2.875975000 |
| 6 | -4.302180000 | 3.645202000 | -1.215012000 |
| 6 | -5.210780000 | 4.408743000 | -0.466226000 |
| 6 | -4.521487000 | 3.490129000 | -2.592501000 |
| 6 | -6.307242000 | 5.012048000 | -1.082395000 |
| 1 | -5.057252000 | 4.525794000 | 0.601795000  |
| 6 | -5.615379000 | 4.099257000 | -3.207998000 |
| 1 | -3.831917000 | 2.892780000 | -3.178989000 |
| 6 | -6.511664000 | 4.861595000 | -2.455668000 |
| 1 | -7.002951000 | 5.596869000 | -0.487936000 |
| 1 | -5.767501000 | 3.976146000 | -4.276234000 |

|   |              |             |              |
|---|--------------|-------------|--------------|
| 1 | -7.364533000 | 5.332425000 | -2.935436000 |
| 6 | -2.133983000 | 5.133391000 | 0.321578000  |
| 6 | -2.185847000 | 6.005854000 | -0.777520000 |
| 6 | -2.026217000 | 5.679666000 | 1.611825000  |
| 6 | -2.145231000 | 7.387078000 | -0.589115000 |
| 1 | -2.254097000 | 5.598251000 | -1.780507000 |
| 6 | -1.993882000 | 7.061758000 | 1.799054000  |
| 1 | -1.978277000 | 5.016211000 | 2.470393000  |
| 6 | -2.053683000 | 7.919715000 | 0.698928000  |
| 1 | -2.181510000 | 8.047394000 | -1.450419000 |
| 1 | -1.921246000 | 7.466799000 | 2.803922000  |
| 1 | -2.024693000 | 8.995441000 | 0.843691000  |

# S16. $^1\text{H}$ , $^{13}\text{C}\{^1\text{H}\}$ NMR and ESI Mass Spectra

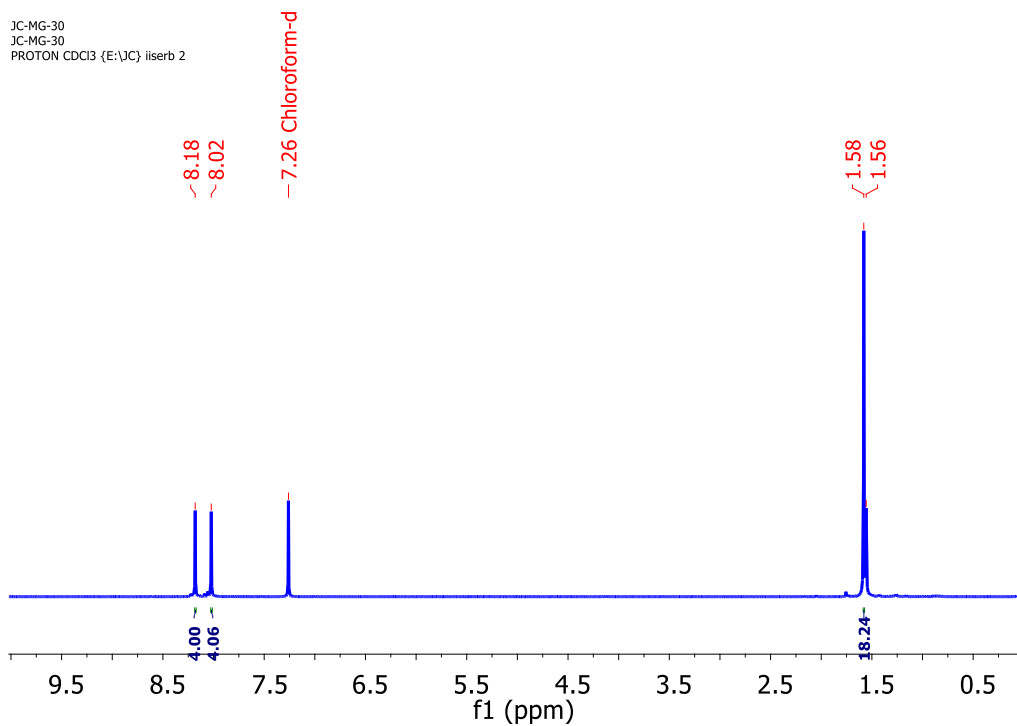

Figure S65.  $^1\text{H}$  NMR spectrum of **2a** in  $\text{CDCl}_3$  (400 MHz, 298 K)

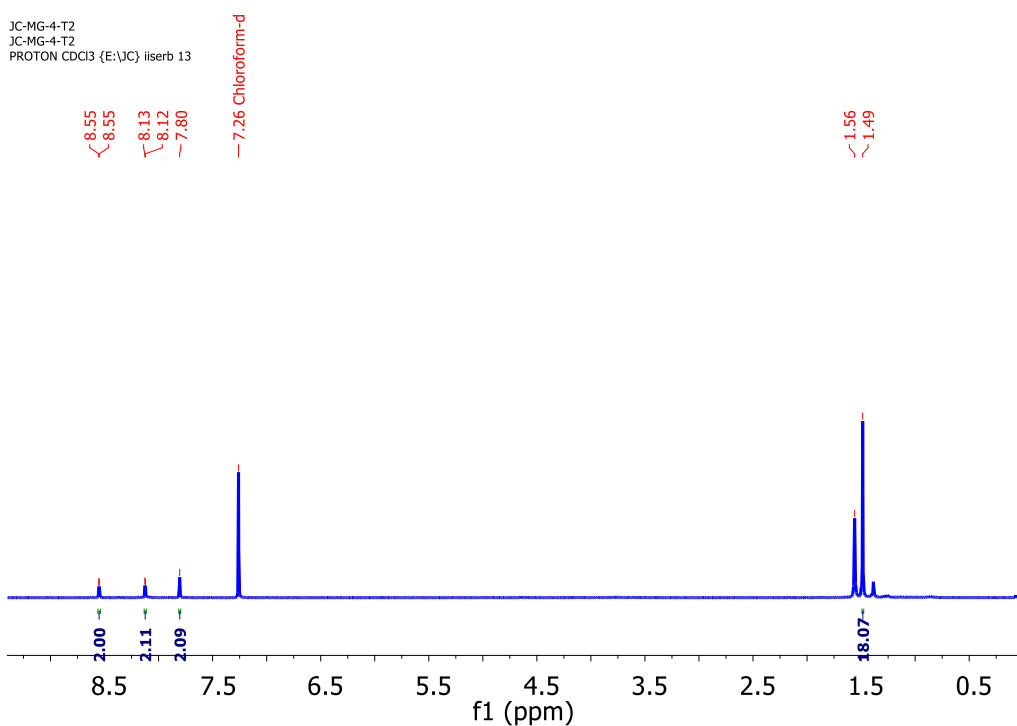

Figure S66.  $^1\text{H}$  NMR spectrum of **3a** in  $\text{CDCl}_3$  (400 MHz, 298 K)

JC-MG-26-4  
JC-MG-26-4  
PROTON DMSO {E:\JC} iiserb 9

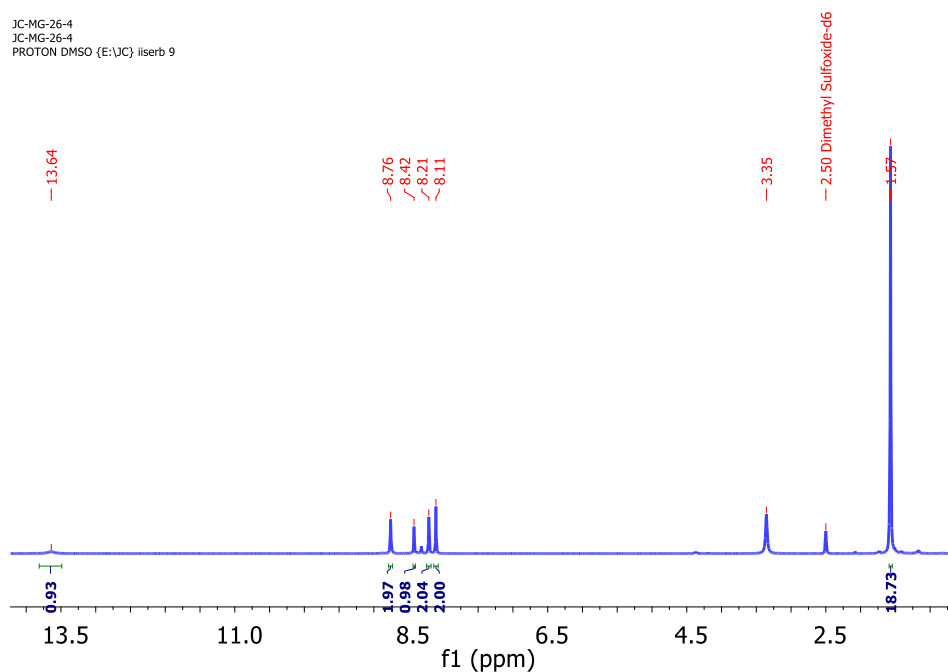

Figure S67.  $^1\text{H}$  NMR spectrum of **4a** in  $\text{DMSO-d}_6$  (400 MHz, 298 K)

JC-MG-02-CDCl3  
JC-MG-02-CDCl3  
PROTON CDCl3 {E:\JC} iiserb 15

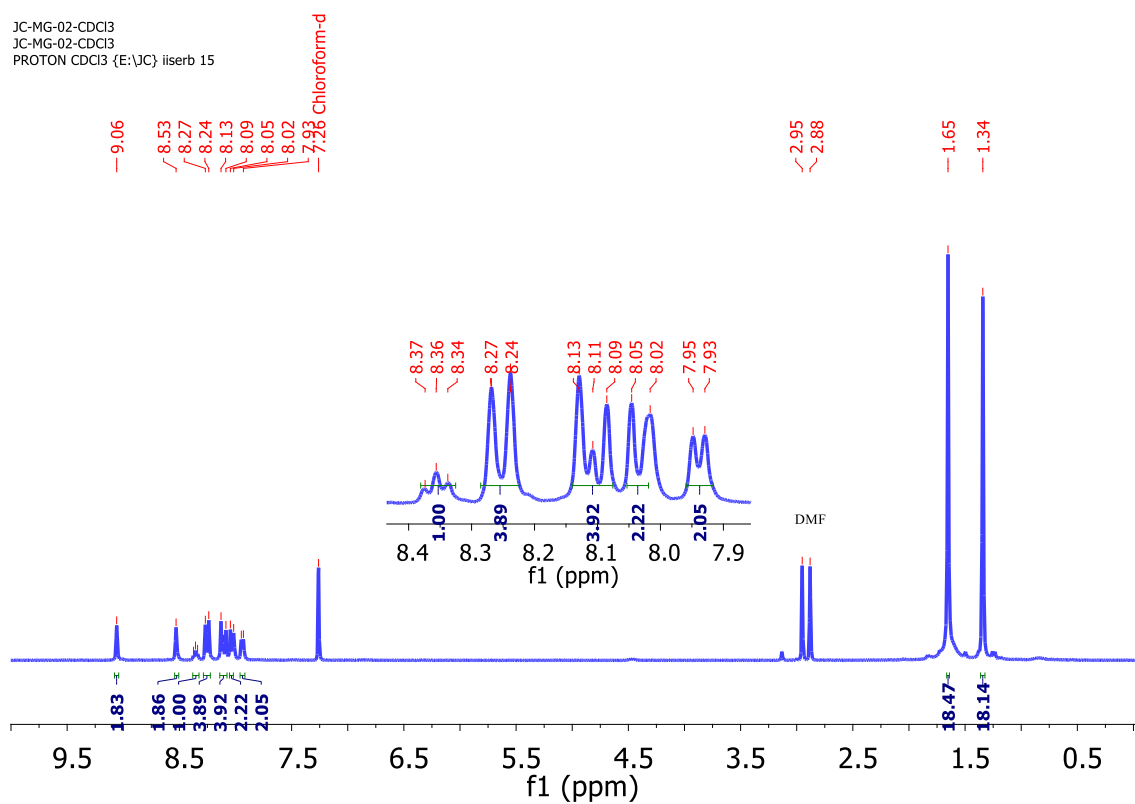

Figure S68.  $^1\text{H}$  NMR spectrum of **PYBIM** in  $\text{CDCl}_3$  (400 MHz, 298 K)

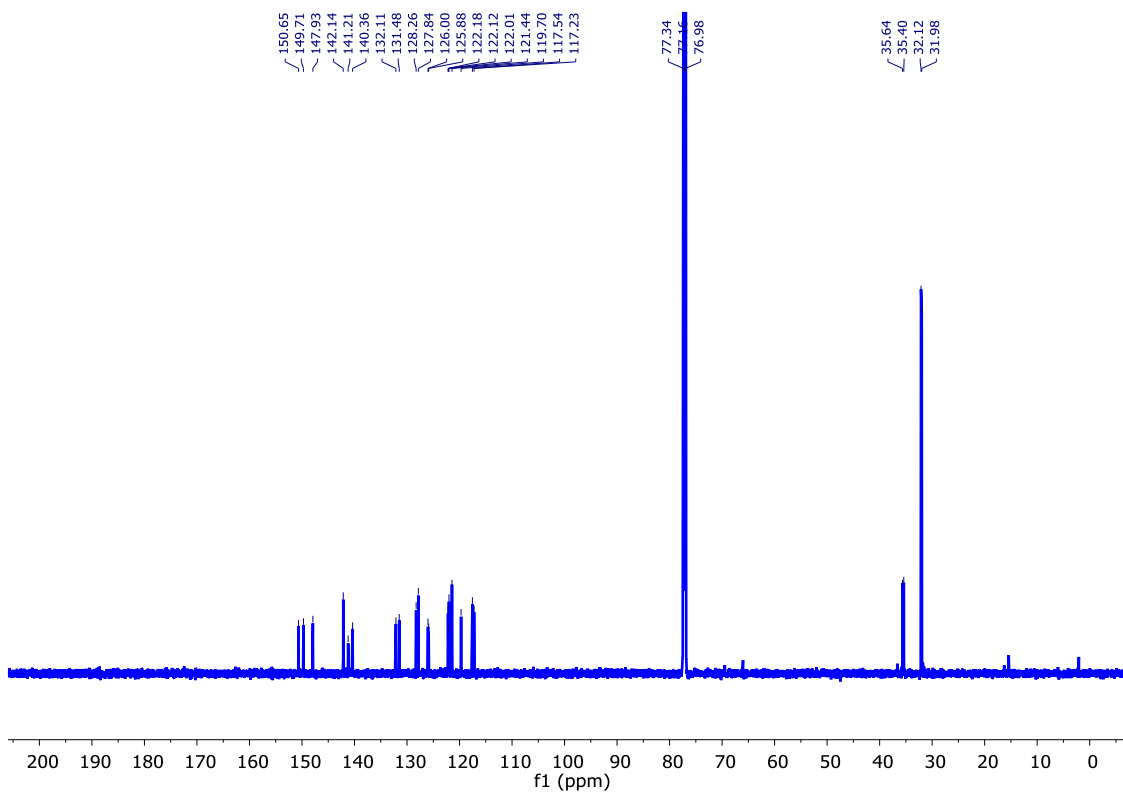

Figure S69.  $^{13}\text{C}$  NMR spectrum of PYBIM in  $\text{CDCl}_3$  (176 MHz, 298 K)

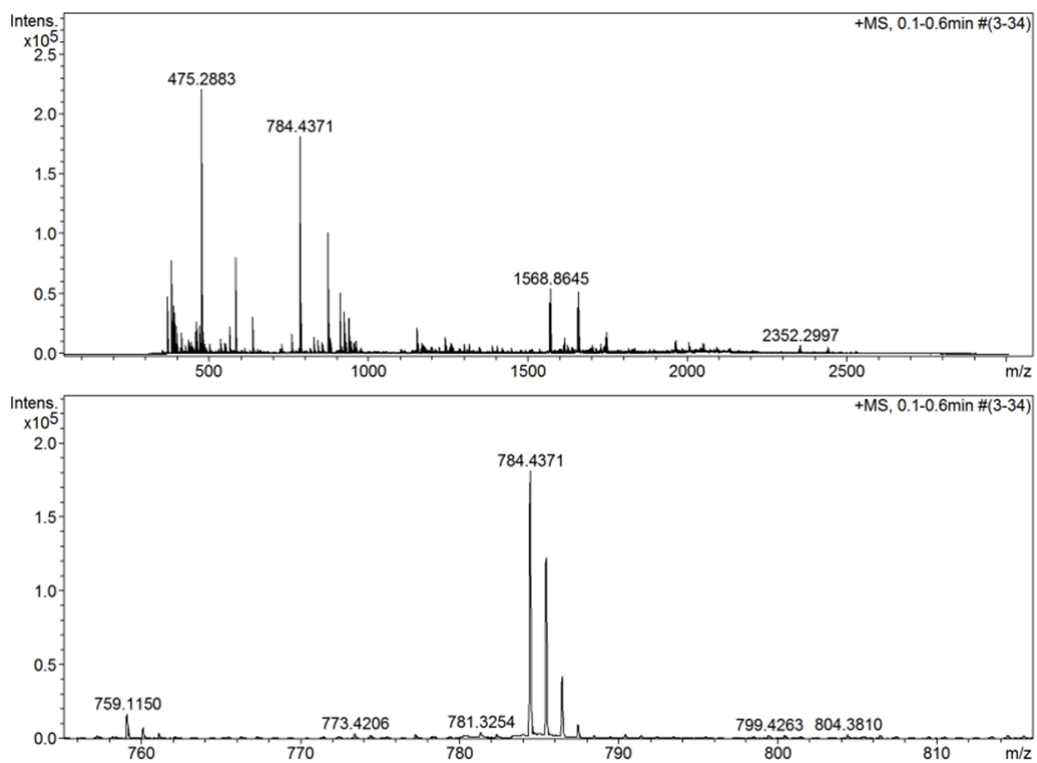

Figure S70. ESI-HRMS of PYBIM (positive ion mode)

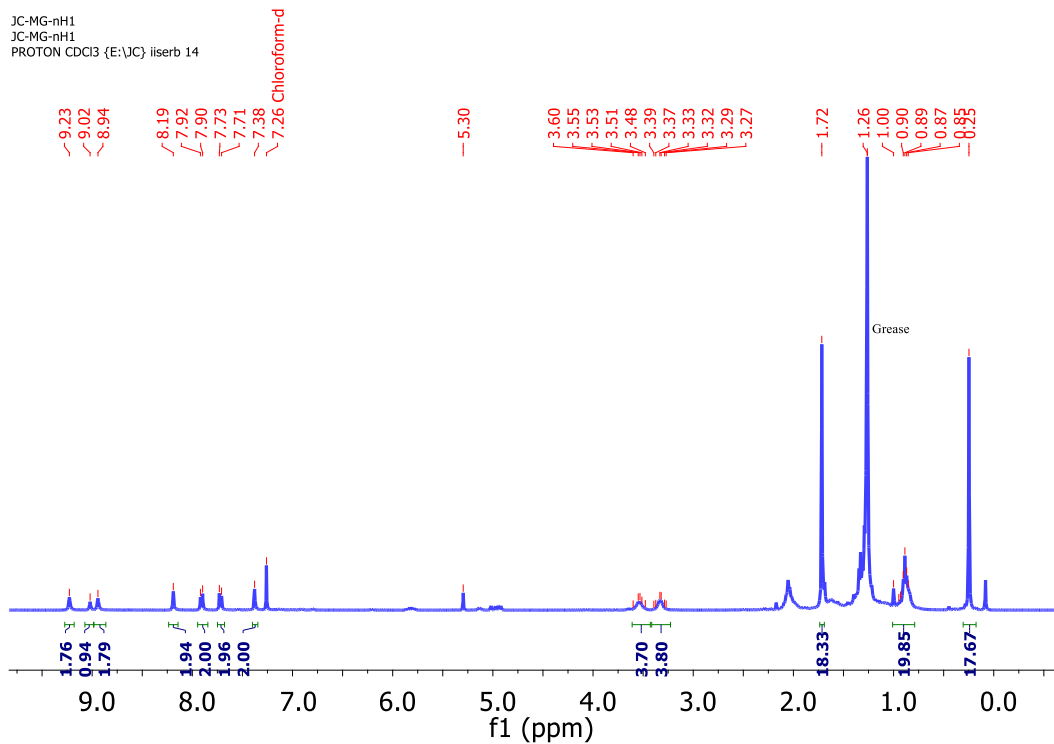

Figure S71.  $^1\text{H}$  NMR spectrum of HELI-1 in  $\text{CDCl}_3$  (400 MHz, 298 K)

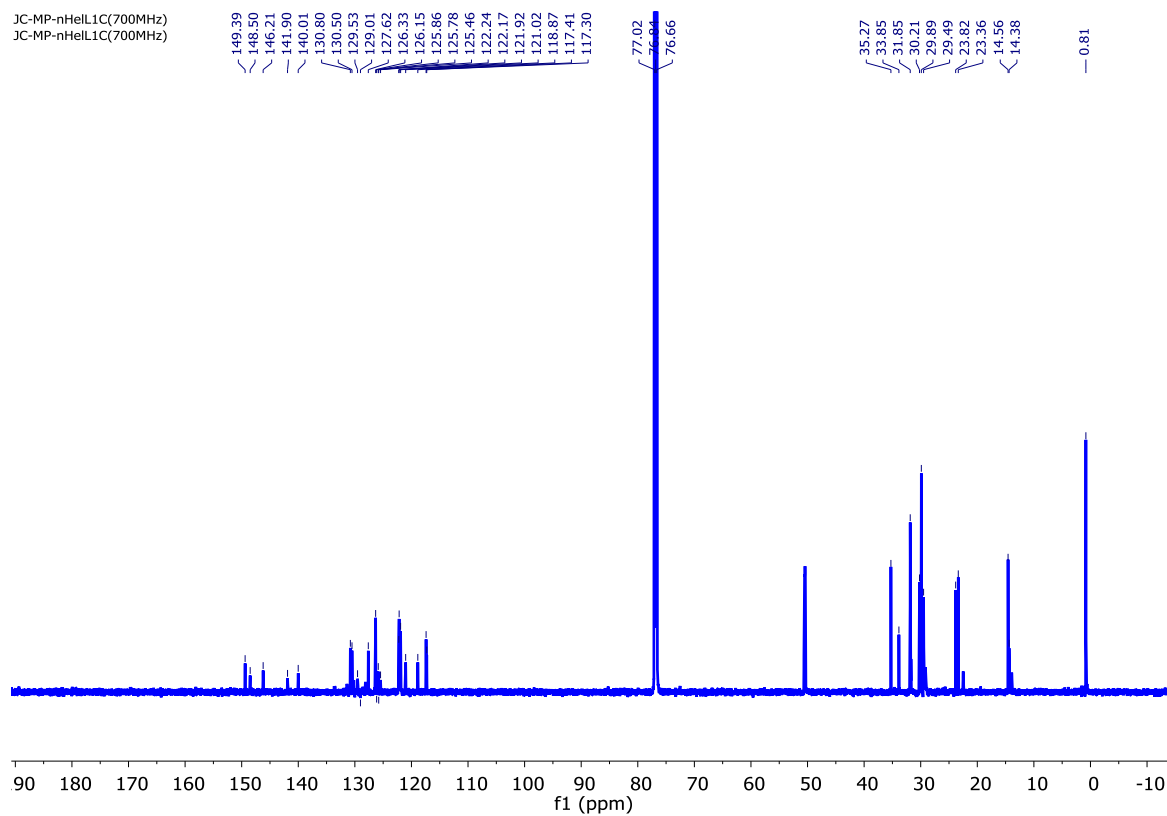

Figure S72.  $^{13}\text{C}$  NMR spectrum of HELI-1 in  $\text{CDCl}_3$  (176 MHz, 298 K)

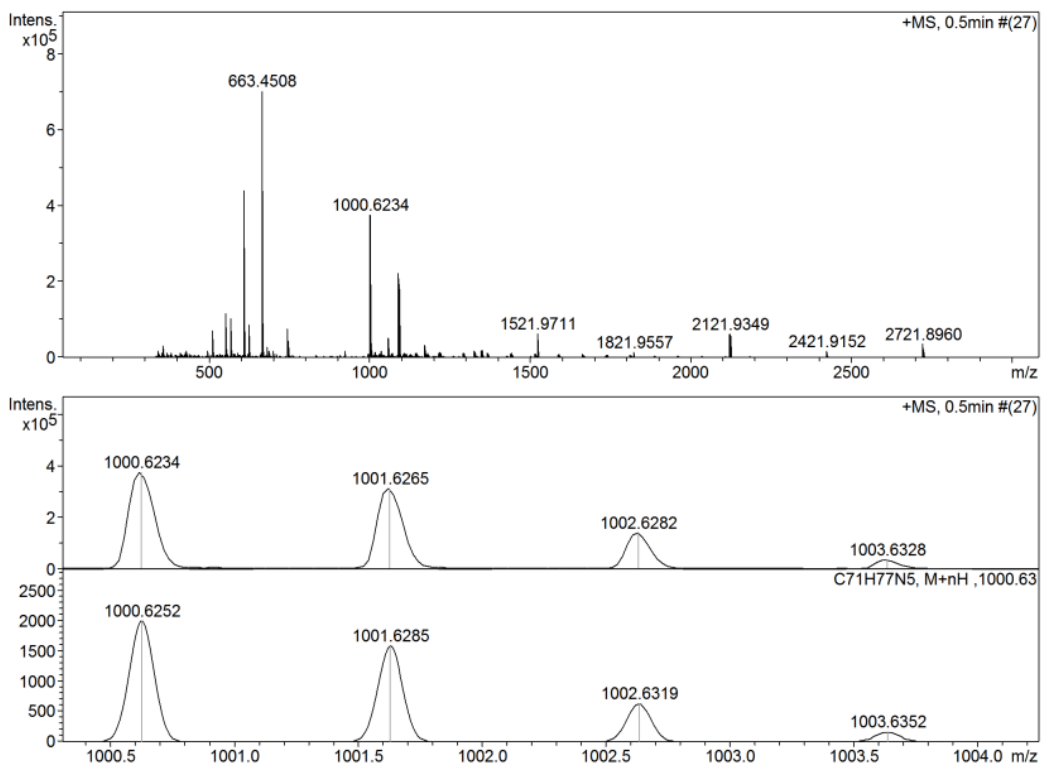

Figure S73. APCI-HRMS of HELI-1 (positive ion mode)

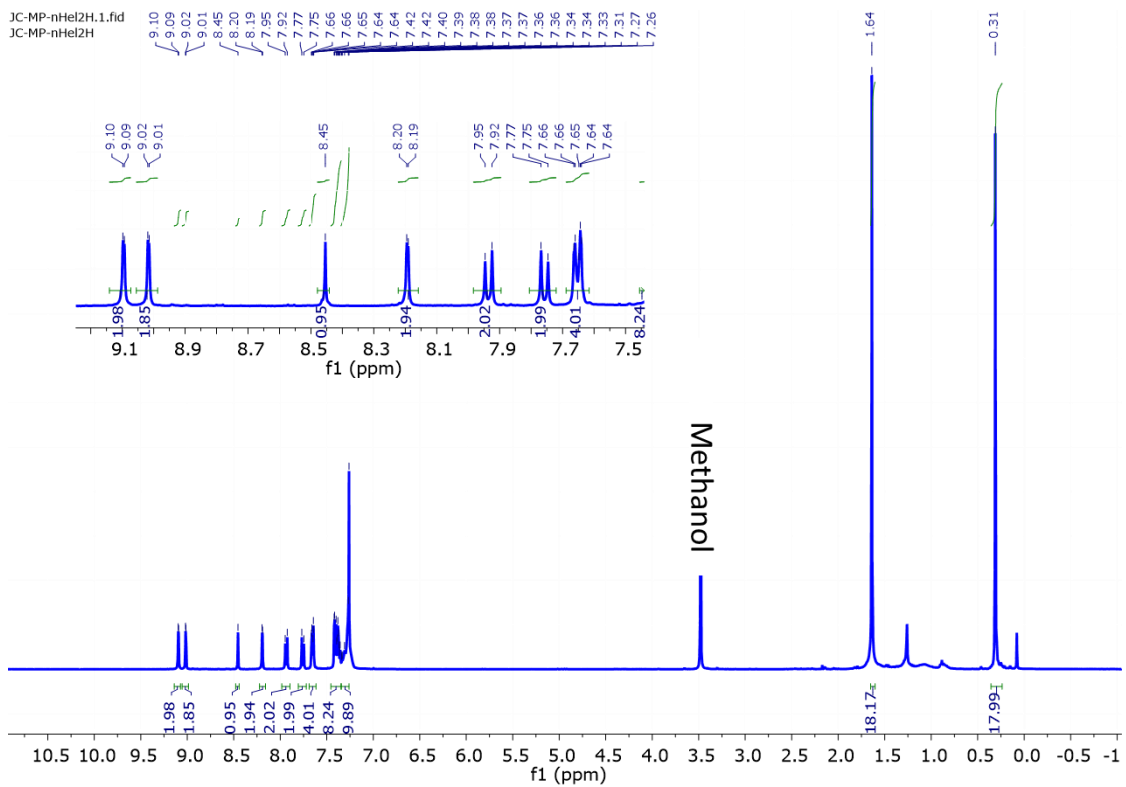

Figure S74.  $^1\text{H}$  NMR spectrum of HELI-2 in  $\text{CDCl}_3$  (400 MHz, 298 K)

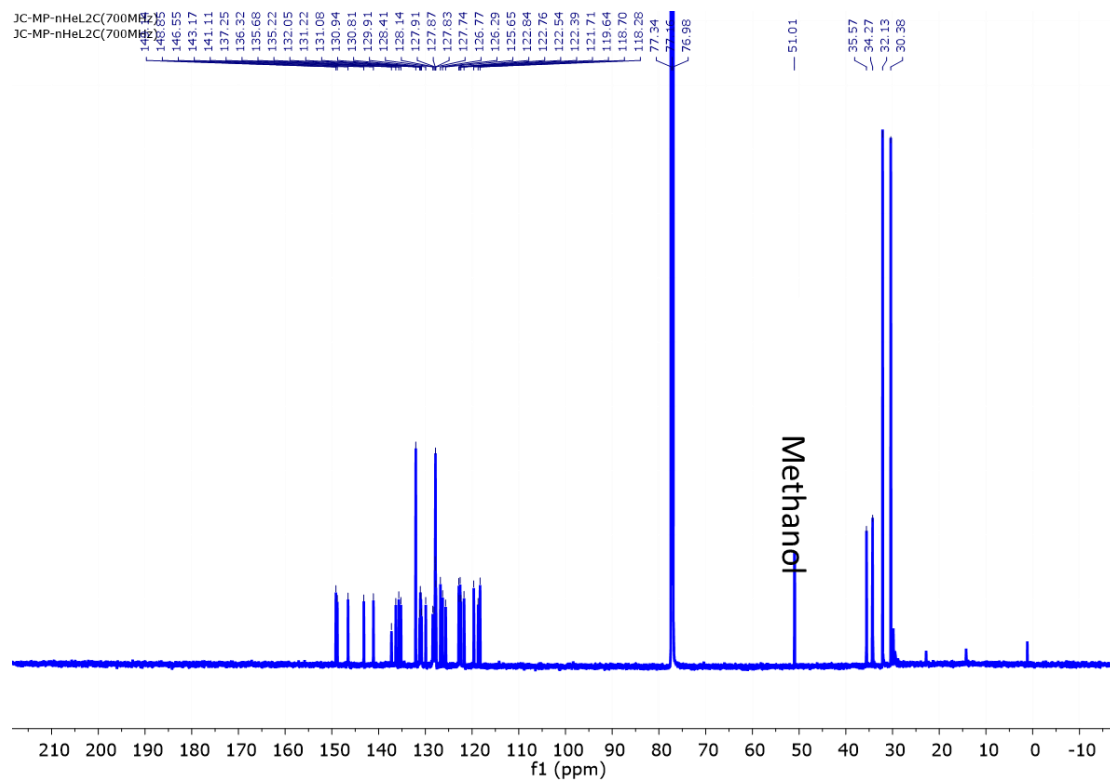

Figure S75.  $^{13}\text{C}$  NMR spectrum of HELI-2 in  $\text{CDCl}_3$  (176 MHz, 298 K)

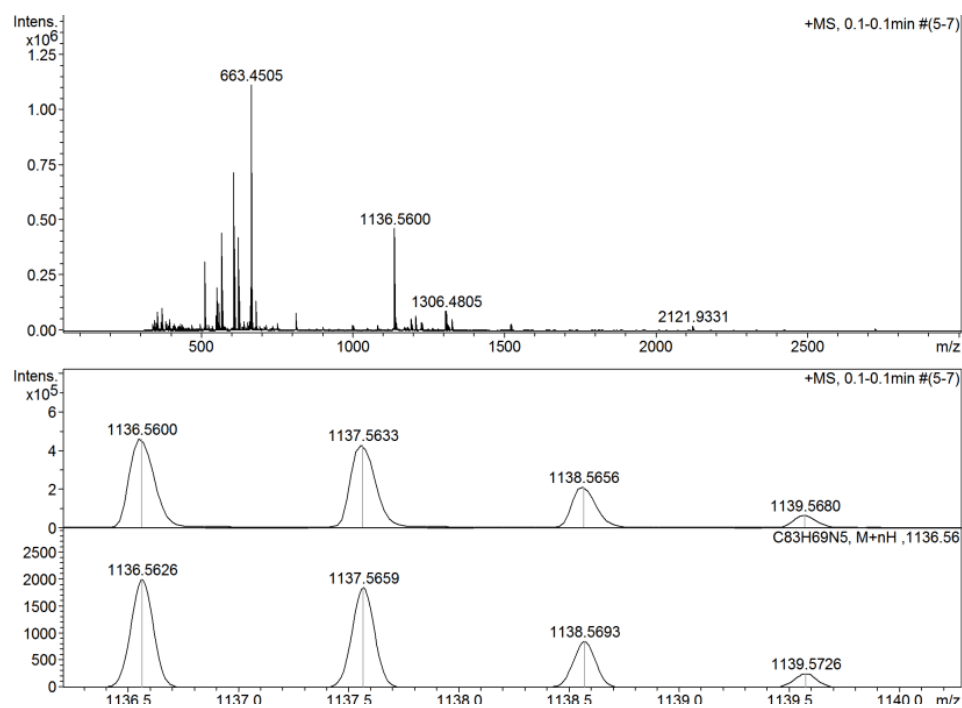

Figure S76. APCI-HRMS of HELI-2 (positive ion mode)

## S17. References

- S1 Y. Du, T. K. Hyster and T. Rovis, *Chem. Commun.*, 2011, **47**, 12074-12076.
- S2 T. H. El-Assaad, K. N. Parida, M. F. Cesario and D. V. McGrath, *Green Chem.*, 2020, **22**, 5966-5971.
- S3 S. Gonell and E. Peris, *ACS Catal.*, 2014, **4**, 2811-2817.
- S4 Gaussian 09, Revision D.01, M. J. Frisch, G. W. Trucks, H. B. Schlegel, G. E. Scuseria, M. A. Robb, J. R. Cheeseman, G. Scalmani, V. Barone, B. Mennucci, G. A. Petersson, H. Nakatsuji, M. Caricato, X. Li, H. P. Hratchian, A. F. Izmaylov, J. Bloino, G. Zheng, J. L. Sonnenberg, M. Hada, M. Ehara, K. Toyota, R. Fukuda, J. Hasegawa, M. Ishida, T. Nakajima, Y. Honda, O. Kitao, H. Nakai, T. Vreven, J. A. Jr. Montgomery, J. E. Peralta, F. Ogliaro, M. Bearpark, J. J. Heyd, E. Brothers, K. N. Kudin, V. N. Staroverov, T. Keith, R. Kobayashi, J. Normand, K. Raghavachari, A. Rendell, J. C. Burant, S. S. Iyengar, J. Tomasi, M. Cossi, N. Rega, J. M. Millam, M. Klene, J. E. Knox, J. B. Cross, V. Bakken, C. Adamo, J. Jaramillo, R. Gomperts, R. E. Stratmann, O. Yazyev, A. J. Austin, R. Cammi, C. Pomelli, J. W. Ochterski, R. L. Martin, K. Morokuma, V. G. Zakrzewski, G. A. Voth, P. Salvador, J. J. Dannenberg, S. Dapprich, A. D. Daniels, O. Farkas, J. B. Foresman, J. V. Ortiz, J. Cioslowski and D. J. Fox, Gaussian, Inc., Wallingford CT, 2013.
- S5 (a) C. Lee, W. Yang and R. G. Parr, *Physical Review B*, 1988, **37**, 785-789; (b) A. D. Becke, *The Journal of Chemical Physics*, 1993, **98**, 5648-5652.
